# Supplementary material for: Uncovering the pharmacological mechanism of the effects of the Banxia-Xiakucao Chinese Herb Pair on sleep disorder by a systems pharmacology approach
Source: PubMed Central journal article supplement (PMC7686484; doi:10.1038/s41598-020-77431-1), 2020-11-24
Supplement: 41598_2020_77431_MOESM1_ESM.pdf [file 41598_2020_77431_MOESM1_ESM.pdf]

## Supplementary tables

**Title:** Uncovering the Pharmacological Mechanism of the Effects of the Banxia-Xiakucuo Chinese Herb Pair on Sleep Disorder by A Systems Pharmacology Approach

**Authors:** Jing Guo, Meng-Ping Lou, Lin-Lin Hu, Xin Zhang

**Supplementary Table S1. All Chemical information of 176 compounds of BXHP**

| <b>Compound ID</b> | <b>Compound Name</b>       | <b>OB(%)</b> | <b>DL</b> | <b>Herb</b>       |
|--------------------|----------------------------|--------------|-----------|-------------------|
| MOL000105          | protocatechuic acid        | 25.37        | 0.04      | Pinellia ternata  |
| MOL000114          | vanillic acid              | 35.47        | 0.04      | Pinellia ternata  |
| MOL000127          | Neral                      | 19.48        | 0.02      | Pinellia ternata  |
| MOL001281          | L-alpha-Palmitin           | 26.66        | 0.22      | Pinellia ternata  |
| MOL000131          | EIC                        | 41.9         | 0.14      | Pinellia ternata  |
|                    |                            |              |           | Prunella vulgaris |
| MOL001385          | 9-Oxononanoic acid         | 19.6         | 0.03      | Pinellia ternata  |
| MOL001396          | PENTADECYLIC ACID          | 20.18        | 0.08      | Pinellia ternata  |
| MOL001452          | protocatechualdehyde       | 38.35        | 0.03      | Pinellia ternata  |
| MOL001492          | Ethyl icosanoate           | 16.67        | 0.25      | Pinellia ternata  |
| MOL000172          | Furool                     | 34.35        | 0.01      | Pinellia ternata  |
| MOL001729          | Crysophanol                | 18.64        | 0.21      | Pinellia ternata  |
| MOL001739          | zoomaric acid              | 35.78        | 0.1       | Pinellia ternata  |
| MOL001744          | uracil                     | 42.53        | 0.02      | Pinellia ternata  |
| MOL001755          | 24-Ethylcholest-4-en-3-one | 36.08        | 0.76      | Pinellia ternata  |
| MOL001757          | GUN                        | 42.45        | 0.04      | Pinellia ternata  |
| MOL001788          | adenine                    | 62.81        | 0.03      | Pinellia ternata  |
| MOL001816          | Amide HPL                  | 19.79        | 0.1       | Pinellia ternata  |
| MOL001818          | Methyl palmitelaidate      | 34.61        | 0.12      | Pinellia ternata  |
| MOL001831          | HX                         | 52.29        | 0.04      | Pinellia ternata  |
| MOL000223          | caffeic acid               | 25.76        | 0.05      | Pinellia ternata  |
|                    |                            |              |           | Prunella vulgaris |
| MOL002254          | Barolub                    | 16.29        | 0.22      | Pinellia ternata  |
| MOL002495          | 6-shogaol                  | 31           | 0.14      | Pinellia ternata  |
| MOL002670          | Cavidine                   | 35.64        | 0.81      | Pinellia ternata  |
| MOL002714          | baicalein                  | 33.52        | 0.21      | Pinellia ternata  |
| MOL002776          | Baicalin                   | 40.12        | 0.75      | Pinellia ternata  |
| MOL000346          | succinic acid              | 29.62        | 0.01      | Pinellia ternata  |
| MOL000357          | Sitogluside                | 20.63        | 0.62      | Pinellia ternata  |
|                    |                            |              |           | Prunella vulgaris |
| MOL000358          | beta-sitosterol            | 36.91        | 0.75      | Pinellia ternata  |
|                    |                            |              |           | Prunella vulgaris |
| MOL000384          | DL-Glucuronic acid         | 3.35         | 0.04      | Pinellia ternata  |
| MOL003870          | gynesine                   | 60.07        | 0.03      | Pinellia ternata  |
| MOL000388          | gamma-aminobutyric acid    | 24.09        | 0.01      | Pinellia ternata  |
| MOL000389          | FERULIC ACID (CIS)         | 54.97        | 0.06      | Pinellia ternata  |
| MOL000394          | choline                    | 0.47         | 0.01      | Pinellia ternata  |
| MOL003969          | L-Serin                    | 98.47        | 0.01      | Pinellia ternata  |
| MOL000397          | cis-p-Coumarate            | 45.98        | 0.04      | Pinellia ternata  |
| MOL003971          | Threonin                   | 73.52        | 0.01      | Pinellia ternata  |

|           |                                                                                  |       |      |                                       |
|-----------|----------------------------------------------------------------------------------|-------|------|---------------------------------------|
| MOL000399 | Docosanoate                                                                      | 15.69 | 0.26 | Pinellia ternata<br>Prunella vulgaris |
| MOL000432 | linolenic acid                                                                   | 45.01 | 0.15 | Pinellia ternata                      |
| MOL004481 | (2S)-2-amino-3-[(2R)-2-amino-3-hydroxy-3-oxopropyl]disulfanylpropanoic acid      | 73.59 | 0.05 | Pinellia ternata                      |
| MOL000449 | Stigmasterol                                                                     | 43.83 | 0.76 | Pinellia ternata<br>Prunella vulgaris |
| MOL000458 | campesterol                                                                      | 5.57  | 0.72 | Pinellia ternata                      |
| MOL004649 | 1-[(2R,3R,4S,5S)-3,4-dihydroxy-5-(hydroxymethyl)oxolan-2-yl]pyrimidine-2,4-dione | 17.85 | 0.11 | Pinellia ternata                      |
| MOL004738 | Spantol                                                                          | 2.42  | 0.04 | Pinellia ternata                      |
| MOL004739 | DAL                                                                              | 85.17 | 0.01 | Pinellia ternata                      |
| MOL000475 | anethole                                                                         | 32.49 | 0.03 | Pinellia ternata                      |
| MOL004796 | soya-cerebroside i                                                               | 3.86  | 0.37 | Pinellia ternata                      |
| MOL004797 | soya-cerebroside i qt                                                            | 21.22 | 0.51 | Pinellia ternata                      |
| MOL000050 | GLY                                                                              | 48.74 | 0    | Pinellia ternata                      |
| MOL005030 | gondoic acid                                                                     | 30.7  | 0.2  | Pinellia ternata                      |
| MOL005125 | ANN                                                                              | 29.69 | 0.03 | Pinellia ternata                      |
| MOL000513 | 3,4,5-trihydroxybenzoic acid                                                     | 31.69 | 0.04 | Pinellia ternata                      |
| MOL000519 | coniferin                                                                        | 31.11 | 0.32 | Pinellia ternata                      |
| MOL000052 | Glutamine                                                                        | 6.66  | 0.02 | Pinellia ternata                      |
| MOL000054 | L-                                                                               | 47.64 | 0.03 | Pinellia ternata                      |
| MOL005448 | Leucinum                                                                         | 72.92 | 0.01 | Pinellia ternata                      |
| MOL000055 | L-Lysin                                                                          | 29.33 | 0.02 | Pinellia ternata                      |
| MOL000056 | DTY                                                                              | 57.55 | 0.05 | Pinellia ternata                      |
| MOL000579 | hydroquinone                                                                     | 29.26 | 0.02 | Pinellia ternata                      |
| MOL006240 | THM                                                                              | 11.34 | 0.11 | Pinellia ternata                      |
| MOL000065 | ASI                                                                              | 79.74 | 0.02 | Pinellia ternata                      |
| MOL006594 | Eciphin                                                                          | 43.35 | 0.03 | Pinellia ternata                      |
| MOL006597 | OMD                                                                              | 92.44 | 0.04 | Pinellia ternata                      |
| MOL000067 | L-Valin                                                                          | 53.33 | 0.01 | Pinellia ternata                      |
| MOL000675 | oleic acid                                                                       | 33.13 | 0.14 | Pinellia ternata<br>Prunella vulgaris |
| MOL000068 | L-Ile                                                                            | 59.05 | 0.02 | Pinellia ternata                      |
| MOL006844 | Norharman                                                                        | 18.88 | 0.08 | Pinellia ternata                      |
| MOL000069 | palmitic acid                                                                    | 19.3  | 0.1  | Pinellia ternata<br>Prunella vulgaris |
| MOL006930 | (+) isolariciresinol 9-o-β-d-glucopyranoside                                     | 3.83  | 0.84 | Pinellia ternata                      |
| MOL006931 | isolariciresino                                                                  | 6.96  | 0.39 | Pinellia ternata                      |

|           |                                                              |        |      |                  |
|-----------|--------------------------------------------------------------|--------|------|------------------|
| MOL006932 | l-Pseudoephedrine                                            | 45.01  | 0.03 | Pinellia ternata |
| MOL006933 | 1,2,3,4,6-penta-o-galloyl- $\beta$ -d-glucose                | 3.01   | 0.13 | Pinellia ternata |
| MOL006934 | WLN: Q5Q                                                     | 24.8   | 0.01 | Pinellia ternata |
| MOL006935 | Octylene                                                     | 39.25  | 0.01 | Pinellia ternata |
| MOL006936 | 10,13-eicosadienoic                                          | 39.99  | 0.2  | Pinellia ternata |
| MOL006937 | 12,13-epoxy-9-hydroxynonadeca-7,10-dienoic acid              | 42.15  | 0.24 | Pinellia ternata |
| MOL006938 | DUR                                                          | 23.69  | 0.09 | Pinellia ternata |
| MOL006939 | Methylpyrazine                                               | 27.1   | 0.01 | Pinellia ternata |
| MOL006940 | D-2-Aminobutyrate                                            | 68.78  | 0.01 | Pinellia ternata |
| MOL006941 | 3-methyleicosa                                               | 10.18  | 0.15 | Pinellia ternata |
| MOL006942 | N-(5-methylisoxazol-3-yl)acetamide                           | 20.82  | 0.02 | Pinellia ternata |
| MOL006943 | 5,8-epidioxyergosta-6,22-dien-3-ol                           | 22.71  | 0.82 | Pinellia ternata |
| MOL006944 | 8-Octadecenoic acid                                          | 33.13  | 0.14 | Pinellia ternata |
| MOL006945 | 9-Heptadecanol                                               | 14.24  | 0.09 | Pinellia ternata |
| MOL006946 | adenosine                                                    | 19.85  | 0.16 | Pinellia ternata |
| MOL006947 | heptadecanoic acid 2,3-dihydroxy-propyl ester                | 25.9   | 0.26 | Pinellia ternata |
| MOL006948 | inosine                                                      | 11.17  | 0.18 | Pinellia ternata |
| MOL006949 | 6-Deoxy-gulose                                               | 44.03  | 0.03 | Pinellia ternata |
| MOL006950 | (2R)-2-acetamidoglutaric acid                                | 15.5   | 0.04 | Pinellia ternata |
| MOL006951 | pedatisectine a                                              | 64.09  | 0.16 | Pinellia ternata |
| MOL006952 | pedatisectine f                                              | 53.81  | 0.06 | Pinellia ternata |
| MOL006953 | Thy                                                          | 74.2   | 0.02 | Pinellia ternata |
| MOL006954 | BVE                                                          | 42.32  | 0.01 | Pinellia ternata |
| MOL000875 | Cedrol                                                       | 16.23  | 0.12 | Pinellia ternata |
| MOL006956 | cyclo-(leu-tyr)                                              | 111.16 | 0.15 | Pinellia ternata |
| MOL006957 | (3S,6S)-3-(benzyl)-6-(4-hydroxybenzyl)piperazin-e2,5-quinone | 46.89  | 0.27 | Pinellia ternata |
| MOL006958 | cyclo-(val-tyr)                                              | 122.79 | 0.14 | Pinellia ternata |
| MOL003578 | Cycloartenol                                                 | 38.69  | 0.78 | Pinellia ternata |
| MOL006960 | (5R)-5-hydroxy-1-(4-hydroxy-3-methoxyphenyl)tetradecan-3-one | 19.14  | 0.28 | Pinellia ternata |
| MOL006961 | GR                                                           | 20.9   | 0.21 | Pinellia ternata |
| MOL006962 | 2Z-hexadecenoic acid                                         | 34.02  | 0.1  | Pinellia ternata |
| MOL006963 | Ethyl linolelaidate                                          | 7.33   | 0.19 | Pinellia ternata |
| MOL006964 | valeraldoxime                                                | 82.58  | 0.01 | Pinellia ternata |
| MOL006965 | soya-cerebroside ii                                          | 3.86   | 0.35 | Pinellia ternata |

|           |                                                                                                                                                                                     |        |      |                   |
|-----------|-------------------------------------------------------------------------------------------------------------------------------------------------------------------------------------|--------|------|-------------------|
| MOL006966 | soya-cerebroside ii Qt                                                                                                                                                              | 21.22  | 0.49 | Pinellia ternata  |
| MOL006967 | beta-D-Ribofuranoside,<br>xanthine-9                                                                                                                                                | 44.72  | 0.21 | Pinellia ternata  |
| MOL000697 | MRY                                                                                                                                                                                 | 59.62  | 0.01 | Pinellia ternata  |
| MOL000708 | WLN: VHR                                                                                                                                                                            | 32.63  | 0.01 | Pinellia ternata  |
| MOL000071 | Istidina                                                                                                                                                                            | 53.18  | 0.03 | Pinellia ternata  |
| MOL000748 | HMF                                                                                                                                                                                 | 45.07  | 0.02 | Pinellia ternata  |
| MOL000774 | (-)-Citronellal                                                                                                                                                                     | 35.71  | 0.02 | Pinellia ternata  |
| MOL000858 | Glycerol palmitate                                                                                                                                                                  | 26.66  | 0.22 | Pinellia ternata  |
| MOL000860 | stearic acid                                                                                                                                                                        | 17.83  | 0.14 | Pinellia ternata  |
|           |                                                                                                                                                                                     |        |      | Prunella vulgaris |
| MOL000089 | catechol                                                                                                                                                                            | 29.86  | 0.02 | Pinellia ternata  |
| MOL000908 | beta-elemene                                                                                                                                                                        | 25.63  | 0.06 | Pinellia ternata  |
| MOL000924 | Mnk                                                                                                                                                                                 | 17.66  | 0.03 | Pinellia ternata  |
| MOL000971 | Ethylpalmitate                                                                                                                                                                      | 18.99  | 0.14 | Pinellia ternata  |
|           |                                                                                                                                                                                     |        |      | Prunella vulgaris |
| MOL000122 | 1,8-cineole                                                                                                                                                                         | 39.73  | 0.05 | Prunella vulgaris |
| MOL000126 | (-)-nopinene                                                                                                                                                                        | 44.84  | 0.05 | Prunella vulgaris |
| MOL000130 | CAM                                                                                                                                                                                 | 67.17  | 0.05 | Prunella vulgaris |
| MOL001393 | myristic acid                                                                                                                                                                       | 21.18  | 0.07 | Prunella vulgaris |
| MOL001654 | Oleanolic acid-28-O-beta-D-<br>glucopyranoside                                                                                                                                      | 11.48  | 0.41 | Prunella vulgaris |
| MOL000197 | Myrcene                                                                                                                                                                             | 24.96  | 0.02 | Prunella vulgaris |
| MOL000002 | cyanidol                                                                                                                                                                            | 1.36   | 0.24 | Prunella vulgaris |
| MOL002004 | endo-fenchol                                                                                                                                                                        | 76.43  | 0.05 | Prunella vulgaris |
| MOL002558 | Skimmetin                                                                                                                                                                           | 27.37  | 0.05 | Prunella vulgaris |
| MOL000263 | oleanolic acid                                                                                                                                                                      | 29.02  | 0.76 | Prunella vulgaris |
| MOL002841 | l-alpha-Fenchone                                                                                                                                                                    | 72.64  | 0.05 | Prunella vulgaris |
| MOL002902 | Ethyl caffeate                                                                                                                                                                      | 103.85 | 0.07 | Prunella vulgaris |
| MOL000305 | lauric acid                                                                                                                                                                         | 23.59  | 0.04 | Prunella vulgaris |
| MOL000361 | Amyrin                                                                                                                                                                              | 17.6   | 0.76 | Prunella vulgaris |
| MOL003837 | esculetin                                                                                                                                                                           | 22.97  | 0.07 | Prunella vulgaris |
| MOL000040 | Scopoletol                                                                                                                                                                          | 27.77  | 0.08 | Prunella vulgaris |
| MOL000415 | rutin                                                                                                                                                                               | 3.2    | 0.68 | Prunella vulgaris |
| MOL000422 | kaempferol                                                                                                                                                                          | 41.88  | 0.24 | Prunella vulgaris |
| MOL004355 | Spinasterol                                                                                                                                                                         | 42.98  | 0.76 | Prunella vulgaris |
| MOL004368 | Hyperin                                                                                                                                                                             | 6.94   | 0.77 | Prunella vulgaris |
| MOL004652 | (2R,3R,4S,5S,6R)-2-<br>[[[(3S,5S,9R,10S,13R,14R,17R)-<br>17-[(E,2R,5S)-5-ethyl-6-<br>methylhept-3-en-2-yl]-10,13-<br>dimethyl-<br>2,3,4,5,6,9,11,12,14,15,16,17-<br>dodecahydro-1H- | 21.2   | 0.63 | Prunella vulgaris |

|           |                                                                       |       |      |                   |
|-----------|-----------------------------------------------------------------------|-------|------|-------------------|
|           | cyclopenta[a]phenanthren-3-yl]oxy]-6-(hydroxymethyl)oxan-e3,4,5-triol |       |      |                   |
| MOL004798 | delphinidin                                                           | 40.63 | 0.28 | Prunella vulgaris |
| MOL000499 | malvidin                                                              | 2.48  | 0.34 | Prunella vulgaris |
| MOL000511 | ursolic acid                                                          | 16.77 | 0.75 | Prunella vulgaris |
| MOL000515 | Melissic acid                                                         | 13.22 | 0.49 | Prunella vulgaris |
| MOL005151 | [(3S)-3,7-dimethylocta-1,6-dien-3-yl] acetate                         | 36.84 | 0.04 | Prunella vulgaris |
| MOL005217 | $\Delta$ 7-stigmasterol                                               | 13.01 | 0.76 | Prunella vulgaris |
| MOL000561 | Astragalin                                                            | 14.03 | 0.74 | Prunella vulgaris |
| MOL000006 | luteolin                                                              | 36.16 | 0.25 | Prunella vulgaris |
| MOL000659 | Montanic acid                                                         | 13.69 | 0.46 | Prunella vulgaris |
| MOL000663 | lignoceric acid                                                       | 14.9  | 0.33 | Prunella vulgaris |
| MOL006763 | Malvidin-3,5-diglucoside                                              | 13.89 | 0.63 | Prunella vulgaris |
| MOL006764 | Peonin                                                                | 13.71 | 0.69 | Prunella vulgaris |
| MOL006765 | peonidin                                                              | 26.92 | 0.27 | Prunella vulgaris |
| MOL006766 | Vulgarsaponin B                                                       | 18.75 | 0.23 | Prunella vulgaris |
| MOL006767 | Vulgaxanthin-I                                                        | 56.14 | 0.26 | Prunella vulgaris |
| MOL006768 | arjunglucoside I                                                      | 8.11  | 0.35 | Prunella vulgaris |
| MOL006769 | isoquercetrin                                                         | 3.86  | 0.78 | Prunella vulgaris |
| MOL006770 | niga-chigoside F1                                                     | 8.1   | 0.35 | Prunella vulgaris |
| MOL006771 | poriferasterol monoglucoside                                          | 21.32 | 0.63 | Prunella vulgaris |
| MOL006772 | poriferasterol monoglucoside qt                                       | 43.83 | 0.76 | Prunella vulgaris |
| MOL006773 | sericoside                                                            | 7.76  | 0.35 | Prunella vulgaris |
| MOL006774 | stigmast-7-enol                                                       | 37.42 | 0.75 | Prunella vulgaris |
| MOL000698 | (R)-(-)-alpha-Phellandrene                                            | 27.51 | 0.02 | Prunella vulgaris |
| MOL000737 | morin                                                                 | 46.23 | 0.27 | Prunella vulgaris |
| MOL000771 | p-coumaric acid                                                       | 43.29 | 0.04 | Prunella vulgaris |
| MOL000498 | isoorientin                                                           | 23.3  | 0.76 | Prunella vulgaris |
| MOL000870 | HEXATRIACONTANE                                                       | 7.95  | 0.41 | Prunella vulgaris |
| MOL000009 | luteolin-7-o-glucoside                                                | 7.29  | 0.78 | Prunella vulgaris |
| MOL000098 | quercetin                                                             | 46.43 | 0.28 | Prunella vulgaris |

OB: Oral Bioavailability; DL: Drug-Likeness

**Supplementary Table S2. Chemical information of 22 candidate compounds of BXHP**

| <b>Compound ID</b> | <b>Compound name</b>                 | <b>OB(%)</b> | <b>DL</b> | <b>Herb</b>       |
|--------------------|--------------------------------------|--------------|-----------|-------------------|
| MOL001755          | 24-Ethylcholest-4-en-3-one           | 36.08        | 0.76      | Pinellia ternate  |
| MOL002670          | Cavidine                             | 35.64        | 0.81      | Pinellia ternate  |
| MOL002714          | baicalein                            | 33.52        | 0.21      | Pinellia ternate  |
| MOL002776          | Baicalin                             | 40.12        | 0.75      | Pinellia ternate  |
| MOL000358          | beta-sitosterol                      | 36.91        | 0.75      | Pinellia ternate  |
|                    |                                      |              |           | Prunella vulgaris |
| MOL000449          | Stigmasterol                         | 43.83        | 0.76      | Pinellia ternate  |
|                    |                                      |              |           | Prunella vulgaris |
| MOL005030          | gondoic acid                         | 30.7         | 0.2       | Pinellia ternate  |
| MOL000519          | coniferin                            | 31.11        | 0.32      | Pinellia ternate  |
| MOL006936          | 10,13-eicosadienoic                  | 39.99        | 0.2       | Pinellia ternate  |
|                    | 12,13-epoxy-9-                       | 42.15        | 0.24      | Pinellia ternate  |
| MOL006937          | hydroxynonadeca-7,10-dienoic acid    |              |           |                   |
|                    | (3S,6S)-3-(benzyl)-6-(4-             | 46.89        | 0.27      | Pinellia ternate  |
| MOL006957          | hydroxybenzyl)piperazine-2,5-quinone |              |           |                   |
| MOL003578          | Cycloartenol                         | 38.69        | 0.78      | Pinellia ternate  |
| MOL006967          | beta-D-Ribofuranoside, xanthine-9    | 44.72        | 0.21      | Pinellia ternate  |
| MOL000422          | kaempferol                           | 41.88        | 0.24      | Prunella vulgaris |
| MOL004355          | Spinasterol                          | 42.98        | 0.76      | Prunella vulgaris |
| MOL004798          | delphinidin                          | 40.63        | 0.28      | Prunella vulgaris |
| MOL000006          | luteolin                             | 36.16        | 0.25      | Prunella vulgaris |
| MOL006767          | Vulgaxanthin-I                       | 56.14        | 0.26      | Prunella vulgaris |
| MOL006772          | poriferasterol monoglucoside_qt      | 43.83        | 0.76      | Prunella vulgaris |
| MOL006774          | stigmast-7-enol                      | 37.42        | 0.75      | Prunella vulgaris |
| MOL000737          | morin                                | 46.23        | 0.27      | Prunella vulgaris |
| MOL000098          | quercetin                            | 46.43        | 0.28      | Prunella vulgaris |

OB: Oral Bioavailability; DL: Drug-Likeness

**Supplementary Table S3. All targets of 19 candidate compounds**

| <b>Compound ID</b> | <b>Compound Name</b>       | <b>Target</b>                                                   | <b>Symbol</b> |
|--------------------|----------------------------|-----------------------------------------------------------------|---------------|
| MOL001755          | 24-Ethylcholest-4-en-3-one | Progesterone receptor                                           | PGR           |
| MOL001755          | 24-Ethylcholest-4-en-3-one | Mineralocorticoid receptor                                      | NR3C2         |
| MOL002670          | Cavidine                   | Prostaglandin G/H synthase 1                                    | PTGS1         |
| MOL002670          | Cavidine                   | Muscarinic acetylcholine receptor M3                            | CHRM3         |
| MOL002670          | Cavidine                   | Potassium voltage-gated channel subfamily H member 2            | KCNH2         |
| MOL002670          | Cavidine                   | Muscarinic acetylcholine receptor M1                            | CHRM1         |
| MOL002670          | Cavidine                   | Beta-1 adrenergic receptor                                      | ADRB1         |
| MOL002670          | Cavidine                   | Sodium channel protein type 5 subunit alpha                     | SCN5A         |
| MOL002670          | Cavidine                   | Muscarinic acetylcholine receptor M5                            | CHRM5         |
| MOL002670          | Cavidine                   | Prostaglandin G/H synthase 2                                    | PTGS2         |
| MOL002670          | Cavidine                   | 5-hydroxytryptamine receptor 3A                                 | HTR3A         |
| MOL002670          | Cavidine                   | Alpha-2C adrenergic receptor                                    | ADRA2C        |
| MOL002670          | Cavidine                   | Muscarinic acetylcholine receptor M4                            | CHRM4         |
| MOL002670          | Cavidine                   | Retinoic acid receptor RXR-alpha                                | RXRA          |
| MOL002670          | Cavidine                   | Delta-type opioid receptor                                      | OPRD1         |
| MOL002670          | Cavidine                   | Alpha-1B adrenergic receptor                                    | ADRA1B        |
| MOL002670          | Cavidine                   | Beta-2 adrenergic receptor                                      | ADRB2         |
| MOL002670          | Cavidine                   | Alpha-1D adrenergic receptor                                    | ADRA1D        |
| MOL002670          | Cavidine                   | Mu-type opioid receptor                                         | OPRM1         |
| MOL002670          | Cavidine                   | Retinoic acid receptor RXR-beta                                 | RXRB          |
| MOL002670          | Cavidine                   | Sodium-dependent serotonin transporter                          | SLC6A4        |
| MOL002670          | Cavidine                   | Coagulation factor VII                                          | F7            |
| MOL002670          | Cavidine                   | cAMP and cAMP-inhibited cGMP 3',5'-cyclic phosphodiesterase 10A | PDE10A        |
| MOL002714          | baicalein                  | Prostaglandin G/H synthase 1                                    | PTGS1         |
| MOL002714          | baicalein                  | Androgen receptor                                               | AR            |
| MOL002714          | baicalein                  | Prostaglandin G/H synthase 2                                    | PTGS2         |
| MOL002714          | baicalein                  | Trypsin-1                                                       | PRSS1         |
| MOL002714          | baicalein                  | Nuclear receptor coactivator 2                                  | NCOA2         |
| MOL002714          | baicalein                  | Nuclear receptor coactivator 1                                  | NCOA1         |
| MOL002714          | baicalein                  | Transcription factor p65                                        | RELA          |



|           |                 |                                                         |            |
|-----------|-----------------|---------------------------------------------------------|------------|
| MOL002714 | baicalein       | RAC-alpha serine/threonine-<br>protein kinase           | AKT1       |
| MOL002714 | baicalein       | Vascular endothelial growth<br>factor A                 | VEGFA      |
| MOL002714 | baicalein       | Apoptosis regulator Bcl-2                               | BCL2       |
| MOL002714 | baicalein       | Proto-oncogene c-Fos                                    | FOS        |
| MOL002714 | baicalein       | Apoptosis regulator BAX                                 | BAX        |
| MOL002714 | baicalein       | Matrix metalloproteinase-9                              | MMP9       |
| MOL002714 | baicalein       | Caspase-3                                               | CASP3      |
| MOL002714 | baicalein       | Cellular tumor antigen p53                              | TP63       |
| MOL002714 | baicalein       | Hypoxia-inducible factor 1-<br>alpha                    | HIF1A      |
| MOL002714 | baicalein       | Fos-related antigen 1                                   | FOSL1      |
| MOL002714 | baicalein       | Fos-related antigen 2                                   | FOSL2      |
| MOL002714 | baicalein       | G2/mitotic-specific cyclin-B1                           | CCNB1      |
| MOL002714 | baicalein       | Myeloperoxidase                                         | MPO        |
| MOL002714 | baicalein       | Aryl hydrocarbon receptor                               | AHR        |
| MOL002714 | baicalein       | Insulin-like growth factor II                           | IGF2       |
| MOL002714 | baicalein       | Cytochrome c                                            | CYCS       |
| MOL002714 | baicalein       | Arachidonate 12-lipoxygenase,<br>12S-type               | ALOX12     |
| MOL002714 | baicalein       | Nuclear factor of activated T-<br>cells, cytoplasmic 1  | NFATC1     |
| MOL002714 | baicalein       | Tudor domain-containing<br>protein 7                    | TDRD7      |
| MOL002714 | baicalein       | Egl nine homolog 1                                      | EGLN1      |
| MOL002714 | baicalein       | NADPH oxidase 5                                         | NOX5       |
| MOL002714 | baicalein       | Apolipoprotein D                                        | APOD       |
| MOL000358 | beta-sitosterol | Progesterone receptor                                   | PGR        |
| MOL000358 | beta-sitosterol | Nuclear receptor coactivator 2                          | NCOA2      |
| MOL000358 | beta-sitosterol | Prostaglandin G/H synthase 1                            | PTGS1      |
| MOL000358 | beta-sitosterol | Prostaglandin G/H synthase 2                            | PTGS2      |
| MOL000358 | beta-sitosterol | Potassium voltage-gated channel<br>subfamily H member 2 | KCNH2      |
| MOL000358 | beta-sitosterol | Muscarinic acetylcholine<br>receptor M3                 | CHRM3      |
| MOL000358 | beta-sitosterol | Muscarinic acetylcholine<br>receptor M1                 | CHRM1      |
| MOL000358 | beta-sitosterol | Sodium channel protein type 5<br>subunit alpha          | SCN5A      |
| MOL000358 | beta-sitosterol | Muscarinic acetylcholine<br>receptor M4                 | CHRM4      |
| MOL000358 | beta-sitosterol | Alpha-1A adrenergic receptor                            | ADRA1<br>A |

|           |                 |                                                  |        |
|-----------|-----------------|--------------------------------------------------|--------|
| MOL000358 | beta-sitosterol | Muscarinic acetylcholine receptor M2             | CHRM2  |
| MOL000358 | beta-sitosterol | Alpha-1B adrenergic receptor                     | ADRA1B |
| MOL000358 | beta-sitosterol | Beta-2 adrenergic receptor                       | ADRB2  |
| MOL000358 | beta-sitosterol | Neuronal acetylcholine receptor subunit alpha-2  | CHRNA2 |
| MOL000358 | beta-sitosterol | Sodium-dependent serotonin transporter           | SLC6A4 |
| MOL000358 | beta-sitosterol | Mu-type opioid receptor                          | OPRM1  |
| MOL000358 | beta-sitosterol | Gamma-aminobutyric acid receptor subunit alpha-1 | GABRA1 |
| MOL000358 | beta-sitosterol | Apoptosis regulator Bcl-2                        | BCL2   |
| MOL000358 | beta-sitosterol | Apoptosis regulator BAX                          | BAX    |
| MOL000358 | beta-sitosterol | Caspase-9                                        | CASP9  |
| MOL000358 | beta-sitosterol | Transcription factor AP-1                        | JUN    |
| MOL000358 | beta-sitosterol | Caspase-3                                        | CASP3  |
| MOL000358 | beta-sitosterol | Caspase-8                                        | CASP8  |
| MOL000358 | beta-sitosterol | Protein kinase C alpha type                      | PRKCA  |
| MOL000358 | beta-sitosterol | Serum paraoxonase/arylesterase 1                 | PON1   |
| MOL000358 | beta-sitosterol | Microtubule-associated protein 2                 | MAP2   |
| MOL000449 | Stigmasterol    | Progesterone receptor                            | PGR    |
| MOL000449 | Stigmasterol    | Mineralocorticoid receptor                       | NR3C2  |
| MOL000449 | Stigmasterol    | Nuclear receptor coactivator 2                   | NCOA2  |
| MOL000449 | Stigmasterol    | Alcohol dehydrogenase 1C                         | ADH1C  |
| MOL000449 | Stigmasterol    | Retinoic acid receptor RXR-alpha                 | RXRA   |
| MOL000449 | Stigmasterol    | Nuclear receptor coactivator 1                   | NCOA1  |
| MOL000449 | Stigmasterol    | Prostaglandin G/H synthase 1                     | PTGS1  |
| MOL000449 | Stigmasterol    | Prostaglandin G/H synthase 2                     | PTGS2  |
| MOL000449 | Stigmasterol    | Alpha-2A adrenergic receptor                     | ADRA2A |
| MOL000449 | Stigmasterol    | Sodium-dependent noradrenaline transporter       | SLC6A2 |
| MOL000449 | Stigmasterol    | Sodium-dependent dopamine transporter            | SLC6A3 |
| MOL000449 | Stigmasterol    | Beta-2 adrenergic receptor                       | ADRB2  |
| MOL000449 | Stigmasterol    | Aldose reductase                                 | AKR1B1 |
| MOL000449 | Stigmasterol    | Urokinase-type plasminogen activator             | PLAU   |
| MOL000449 | Stigmasterol    | Leukotriene A-4 hydrolase                        | LTA4H  |
| MOL000449 | Stigmasterol    | Amine oxidase [flavin-containing] B              | MAOB   |

|           |                                                              |                                                  |        |
|-----------|--------------------------------------------------------------|--------------------------------------------------|--------|
| MOL000449 | Stigmasterol                                                 | Amine oxidase [flavin-containing] A              | MAOA   |
| MOL000449 | Stigmasterol                                                 | Chymotrypsinogen B                               | CTRB1  |
| MOL000449 | Stigmasterol                                                 | Muscarinic acetylcholine receptor M3             | CHRM3  |
| MOL000449 | Stigmasterol                                                 | Muscarinic acetylcholine receptor M1             | CHRM1  |
| MOL000449 | Stigmasterol                                                 | Beta-1 adrenergic receptor                       | ADRB1  |
| MOL000449 | Stigmasterol                                                 | Sodium channel protein type 5 subunit alpha      | SCN5A  |
| MOL000449 | Stigmasterol                                                 | Alpha-1A adrenergic receptor                     | ADRA1A |
| MOL000449 | Stigmasterol                                                 | Muscarinic acetylcholine receptor M2             | CHRM2  |
| MOL000449 | Stigmasterol                                                 | Alpha-1B adrenergic receptor                     | ADRA1B |
| MOL000449 | Stigmasterol                                                 | Gamma-aminobutyric acid receptor subunit alpha-1 | GABRA1 |
| MOL005030 | gondoic acid                                                 | Prostaglandin G/H synthase 1                     | PTGS1  |
| MOL005030 | gondoic acid                                                 | Nuclear receptor coactivator 2                   | NCOA2  |
| MOL000519 | coniferin                                                    | Muscarinic acetylcholine receptor M3             | CHRM3  |
| MOL000519 | coniferin                                                    | Muscarinic acetylcholine receptor M1             | CHRM1  |
| MOL000519 | coniferin                                                    | Estrogen receptor                                | ESR1   |
| MOL000519 | coniferin                                                    | Androgen receptor                                | AR     |
| MOL000519 | coniferin                                                    | Sodium channel protein type 5 subunit alpha      | SCN5A  |
| MOL000519 | coniferin                                                    | Peroxisome proliferator activated receptor gamma | PPARG  |
| MOL000519 | coniferin                                                    | Prostaglandin G/H synthase 2                     | PTGS2  |
| MOL000519 | coniferin                                                    | Alpha-1B adrenergic receptor                     | ADRA1B |
| MOL000519 | coniferin                                                    | Beta-2 adrenergic receptor                       | ADRB2  |
| MOL000519 | coniferin                                                    | Alpha-1D adrenergic receptor                     | ADRA1D |
| MOL000519 | coniferin                                                    | Mu-type opioid receptor                          | OPRM1  |
| MOL000519 | coniferin                                                    | Cyclin-A2                                        | CCNA2  |
| MOL000519 | coniferin                                                    | Nuclear receptor coactivator 2                   | NCOA2  |
| MOL000519 | coniferin                                                    | Nuclear receptor coactivator 1                   | NCOA1  |
| MOL006936 | 10,13-eicosadienoic                                          | Prostaglandin G/H synthase 1                     | PTGS1  |
| MOL006936 | 10,13-eicosadienoic                                          | Nuclear receptor coactivator 2                   | NCOA2  |
| MOL006957 | (3S,6S)-3-(benzyl)-6-(4-hydroxybenzyl)piperazine-2,5-quinone | Androgen receptor                                | AR     |
| MOL006957 | (3S,6S)-3-(benzyl)-6-(4-                                     | Prostaglandin G/H synthase 2                     | PTGS2  |

|           |                                                                      |                                                             |         |
|-----------|----------------------------------------------------------------------|-------------------------------------------------------------|---------|
|           | hydroxybenzyl)piperazine-<br>2,5-quinone                             |                                                             |         |
| MOL006957 | (3S,6S)-3-(benzyl)-6-(4-<br>hydroxybenzyl)piperazine-<br>2,5-quinone | Beta-2 adrenergic receptor                                  | ADRB2   |
| MOL003578 | Cycloartenol                                                         | Mineralocorticoid receptor                                  | NR3C2   |
| MOL006967 | beta-D-Ribofuranoside,<br>xanthine-9                                 | Purine nucleoside phosphorylase                             | MTAP    |
| MOL006967 | beta-D-Ribofuranoside,<br>xanthine-9                                 | Prostaglandin G/H synthase 2                                | PTGS2   |
| MOL000422 | kaempferol                                                           | Nitric oxide synthase, inducible                            | NOS2    |
| MOL000422 | kaempferol                                                           | Prostaglandin G/H synthase 1                                | PTGS1   |
| MOL000422 | kaempferol                                                           | Androgen receptor                                           | AR      |
| MOL000422 | kaempferol                                                           | Peroxisome proliferator<br>activated receptor gamma         | PPARG   |
| MOL000422 | kaempferol                                                           | Prostaglandin G/H synthase 2                                | PTGS2   |
| MOL000422 | kaempferol                                                           | Nuclear receptor coactivator 2                              | NCOA2   |
| MOL000422 | kaempferol                                                           | Trypsin-1                                                   | PRSS1   |
| MOL000422 | kaempferol                                                           | Progesterone receptor                                       | PGR     |
| MOL000422 | kaempferol                                                           | Muscarinic acetylcholine<br>receptor M1                     | CHRM1   |
| MOL000422 | kaempferol                                                           | Acetylcholinesterase                                        | ACHE    |
| MOL000422 | kaempferol                                                           | Sodium-dependent<br>noradrenaline transporter               | SLC6A2  |
| MOL000422 | kaempferol                                                           | Muscarinic acetylcholine<br>receptor M2                     | CHRM2   |
| MOL000422 | kaempferol                                                           | Alpha-1B adrenergic receptor                                | ADRA1B  |
| MOL000422 | kaempferol                                                           | Gamma-aminobutyric acid<br>receptor subunit alpha-1         | GABRA1  |
| MOL000422 | kaempferol                                                           | Coagulation factor VII                                      | F7      |
| MOL000422 | kaempferol                                                           | Transcription factor p65                                    | RELA    |
| MOL000422 | kaempferol                                                           | Inhibitor of nuclear factor kappa-<br>B kinase subunit beta | IKBKB   |
| MOL000422 | kaempferol                                                           | RAC-alpha serine/threonine-<br>protein kinase               | AKT1    |
| MOL000422 | kaempferol                                                           | Apoptosis regulator Bcl-2                                   | BCL2    |
| MOL000422 | kaempferol                                                           | Apoptosis regulator BAX                                     | BAX     |
| MOL000422 | kaempferol                                                           | Tumor necrosis factor                                       | TNFSF15 |
| MOL000422 | kaempferol                                                           | Transcription factor AP-1                                   | JUN     |
| MOL000422 | kaempferol                                                           | Activator of 90 kDa heat shock<br>protein ATPase homolog 1  | AHSA1   |
| MOL000422 | kaempferol                                                           | Caspase-3                                                   | CASP3   |
| MOL000422 | kaempferol                                                           | Mitogen-activated protein<br>kinase 8                       | MAPK8   |

|           |             |                                                                         |        |
|-----------|-------------|-------------------------------------------------------------------------|--------|
| MOL000422 | kaempferol  | Interstitial collagenase                                                | MMP1   |
| MOL000422 | kaempferol  | Signal transducer and activator of transcription 1-alpha/beta           | STAT1  |
| MOL000422 | kaempferol  | Peroxisome proliferator-activated receptor gamma                        | PPARG  |
| MOL000422 | kaempferol  | Heme oxygenase 1                                                        | HMOX1  |
| MOL000422 | kaempferol  | Cytochrome P450 3A4                                                     | CYP3A4 |
| MOL000422 | kaempferol  | Cytochrome P450 1A2                                                     | CYP1A2 |
| MOL000422 | kaempferol  | Cytochrome P450 1A1                                                     | CYP1A1 |
| MOL000422 | kaempferol  | Intercellular adhesion molecule 1                                       | ICAM1  |
| MOL000422 | kaempferol  | e-selectin                                                              | SELE   |
| MOL000422 | kaempferol  | Vascular cell adhesion protein 1                                        | VCAM1  |
| MOL000422 | kaempferol  | Nuclear receptor subfamily 1 group I member 2                           | NR1I2  |
| MOL000422 | kaempferol  | Cytochrome P450 1B1                                                     | CYP1B1 |
| MOL000422 | kaempferol  | Arachidonate 5-lipoxygenase                                             | ALOX5  |
| MOL000422 | kaempferol  | Hyaluronan synthase 2                                                   | HAS2   |
| MOL000422 | kaempferol  | Glutathione S-transferase P                                             | GSTP1  |
| MOL000422 | kaempferol  | Aryl hydrocarbon receptor                                               | AHR    |
| MOL000422 | kaempferol  | 26S proteasome non-ATPase regulatory subunit 3                          | PSMD3  |
| MOL000422 | kaempferol  | Solute carrier family 2, facilitated glucose transporter member 4       | SLC2A4 |
| MOL000422 | kaempferol  | Nuclear receptor subfamily 1 group I member 3                           | NR1I3  |
| MOL000422 | kaempferol  | Insulin receptor                                                        | INSR   |
| MOL000422 | kaempferol  | Type I iodothyronine deiodinase                                         | DIO1   |
| MOL000422 | kaempferol  | Serine/threonine-protein phosphatase 2B catalytic subunit alpha isoform | PPP3CA |
| MOL000422 | kaempferol  | Glutathione S-transferase Mu 1                                          | GSTM1  |
| MOL000422 | kaempferol  | Glutathione S-transferase Mu 2                                          | GSTM2  |
| MOL000422 | kaempferol  | Aldo-keto reductase family 1 member C3                                  | AKR1C3 |
| MOL000422 | kaempferol  | Antileukoproteinase                                                     | SLPI   |
| MOL004355 | Spinasterol | Progesterone receptor                                                   | PGR    |
| MOL004355 | Spinasterol | Mineralocorticoid receptor                                              | NR3C2  |
| MOL004355 | Spinasterol | Nuclear receptor coactivator 2                                          | NCOA2  |
| MOL004798 | delphinidin | Nitric oxide synthase, inducible                                        | NOS2   |
| MOL004798 | delphinidin | Prostaglandin G/H synthase 1                                            | PTGS1  |
| MOL004798 | delphinidin | Androgen receptor                                                       | AR     |
| MOL004798 | delphinidin | Prostaglandin G/H synthase 2                                            | PTGS2  |

|           |             |                                                  |         |
|-----------|-------------|--------------------------------------------------|---------|
| MOL004798 | delphinidin | Nuclear receptor coactivator 2                   | NCOA2   |
| MOL000006 | luteolin    | Prostaglandin G/H synthase 1                     | PTGS1   |
| MOL000006 | luteolin    | Androgen receptor                                | AR      |
| MOL000006 | luteolin    | Prostaglandin G/H synthase 2                     | PTGS2   |
| MOL000006 | luteolin    | Trypsin-1                                        | PRSS1   |
| MOL000006 | luteolin    | Nuclear receptor coactivator 2                   | NCOA2   |
| MOL000006 | luteolin    | Transcription factor p65                         | RELA    |
| MOL000006 | luteolin    | Epidermal growth factor receptor                 | EGFR    |
| MOL000006 | luteolin    | RAC-alpha serine/threonine-protein kinase        | AKT1    |
| MOL000006 | luteolin    | Vascular endothelial growth factor A             | VEGFA   |
| MOL000006 | luteolin    | G1/S-specific cyclin-D1                          | CCND1   |
| MOL000006 | luteolin    | Bcl-2-like protein 1                             | BCL2L1  |
| MOL000006 | luteolin    | Cyclin-dependent kinase inhibitor 1              | CDKN1A  |
| MOL000006 | luteolin    | Caspase-9                                        | CASP9   |
| MOL000006 | luteolin    | 72 kDa type IV collagenase                       | MMP2    |
| MOL000006 | luteolin    | Matrix metalloproteinase-9                       | MMP9    |
| MOL000006 | luteolin    | Mitogen-activated protein kinase 1               | MAPK1   |
| MOL000006 | luteolin    | Interleukin-10                                   | IL10    |
| MOL000006 | luteolin    | Retinoblastoma-associated protein                | RB1     |
| MOL000006 | luteolin    | Tumor necrosis factor                            | TNFSF15 |
| MOL000006 | luteolin    | Transcription factor AP-1                        | JUN     |
| MOL000006 | luteolin    | Interleukin-6                                    | IL6     |
| MOL000006 | luteolin    | Caspase-3                                        | CASP3   |
| MOL000006 | luteolin    | Cellular tumor antigen p53                       | TP63    |
| MOL000006 | luteolin    | NF-kappa-B inhibitor alpha                       | NFKBIA  |
| MOL000006 | luteolin    | DNA topoisomerase 1                              | TOP1    |
| MOL000006 | luteolin    | E3 ubiquitin-protein ligase Mdm2                 | MDM2    |
| MOL000006 | luteolin    | Amyloid beta A4 protein                          | APP     |
| MOL000006 | luteolin    | Interstitial collagenase                         | MMP1    |
| MOL000006 | luteolin    | Proliferating cell nuclear antigen               | PCNA    |
| MOL000006 | luteolin    | Receptor tyrosine-protein kinase erbB-2          | ERBB2   |
| MOL000006 | luteolin    | Peroxisome proliferator-activated receptor gamma | PPARG   |
| MOL000006 | luteolin    | Heme oxygenase 1                                 | HMOX1   |
| MOL000006 | luteolin    | Caspase-7                                        | CASP7   |
| MOL000006 | luteolin    | Intercellular adhesion molecule                  | ICAM1   |

|           |                                 |                                                                   |        |
|-----------|---------------------------------|-------------------------------------------------------------------|--------|
|           |                                 | 1                                                                 |        |
| MOL000006 | luteolin                        | Induced myeloid leukemia cell differentiation protein Mcl-1       | MCL1   |
| MOL000006 | luteolin                        | Baculoviral IAP repeat-containing protein 5                       | BIRC5  |
| MOL000006 | luteolin                        | Interleukin-2                                                     | IL2    |
| MOL000006 | luteolin                        | G2/mitotic-specific cyclin-B1                                     | CCNB1  |
| MOL000006 | luteolin                        | Tyrosinase                                                        | TYR    |
| MOL000006 | luteolin                        | Interferon gamma                                                  | IFNG   |
| MOL000006 | luteolin                        | Interleukin-4                                                     | IL4    |
| MOL000006 | luteolin                        | DNA topoisomerase 2-alpha                                         | TOP2A  |
| MOL000006 | luteolin                        | Glutathione S-transferase P                                       | GSTP1  |
| MOL000006 | luteolin                        | Solute carrier family 2, facilitated glucose transporter member 4 | SLC2A4 |
| MOL000006 | luteolin                        | Insulin receptor                                                  | INSR   |
| MOL000006 | luteolin                        | CD40 ligand                                                       | CD40LG |
| MOL000006 | luteolin                        | Prostaglandin E synthase                                          | PTGES  |
| MOL000006 | luteolin                        | Kinetochose protein Nuf2                                          | NUF2   |
| MOL000006 | luteolin                        | Adenylate cyclase type 2                                          | ADCY2  |
| MOL000006 | luteolin                        | Hepatocyte growth factor receptor                                 | MET    |
| MOL006767 | Vulgaxanthin-I                  | Nitric oxide synthase, inducible                                  | NOS2   |
| MOL006767 | Vulgaxanthin-I                  | Prostaglandin G/H synthase 2                                      | PTGS2  |
| MOL006772 | poriferasterol monoglucoside_qt | Progesterone receptor                                             | PGR    |
| MOL006772 | poriferasterol monoglucoside_qt | Nuclear receptor coactivator 2                                    | NCOA2  |
| MOL006774 | stigmast-7-enol                 | Progesterone receptor                                             | PGR    |
| MOL006774 | stigmast-7-enol                 | Nuclear receptor coactivator 2                                    | NCOA2  |
| MOL000737 | morin                           | Prostaglandin G/H synthase 1                                      | PTGS1  |
| MOL000737 | morin                           | Androgen receptor                                                 | AR     |
| MOL000737 | morin                           | Peroxisome proliferator activated receptor gamma                  | PPARG  |
| MOL000737 | morin                           | Prostaglandin G/H synthase 2                                      | PTGS2  |
| MOL000737 | morin                           | DNA topoisomerase 1                                               | TOP1   |
| MOL000737 | morin                           | Endothelin-1                                                      | EDN3   |
| MOL000737 | morin                           | Multidrug resistance protein 1                                    | ABCB1  |
| MOL000737 | morin                           | Arachidonate 5-lipoxygenase                                       | ALOX5  |
| MOL000737 | morin                           | Platelet glycoprotein 4                                           | CD36   |
| MOL000737 | morin                           | Type I iodothyronine deiodinase                                   | DIO1   |
| MOL000737 | morin                           | Glutathione reductase, mitochondrial                              | GSR    |
| MOL000737 | morin                           | Basic leucine zipper                                              | BATF3  |

---

transcriptional factor ATF-like 3

---



**Supplementary Table S4. SD-Related Targets**

| <b>Gene Symbol</b> | <b>Source</b> | <b>Gene Symbol</b> | <b>Source</b> | <b>Gene Symbol</b> | <b>Source</b> |
|--------------------|---------------|--------------------|---------------|--------------------|---------------|
| SLC6A4             | GC            | PDHX               | GC            | MRPL23             | GC            |
|                    | GC            |                    |               |                    |               |
| HCRT               | DrugBan       | PLEKHB2            | GC            | HAP1               | GC            |
|                    | k             |                    |               |                    |               |
| BDNF               | GC            | TSEN2              | GC            | FRG1               | GC            |
| IL6                | GC            | FTSJ1              | GC            | PLOD2              | GC            |
|                    | GC            |                    |               |                    |               |
| HTR2A              | OMIM          | PLEKHM1            | GC            | CPA1               | GC            |
|                    | TTD           |                    |               |                    |               |
| SLC6A3             | GC            | STH                | GC            | NELL1              | GC            |
| TNF                | GC            | ATF4               | GC            | FAM155A            | GC            |
| DRD2               | GC            | ACAT1              | GC            | TOR2A              | GC            |
| APOE               | GC            | PLAG1              | GC            | ZNF589             | GC            |
| COMT               | GC            | TPPP               | GC            | BSPRY              | GC            |
| LEP                | GC            | ZIC2               | GC            | FAM170B            | GC            |
| IGF1               | GC            | CEBPD              | GC            | CD200              | GC            |
| PER3               | GC            | TSEN15             | GC            | B4GALNT2           | GC            |
| MAPT               | GC            | COQ8B              | GC            | TADA2B             | GC            |
| GRIN2A             | GC            | FOXO1              | GC            | SLC4A2             | GC            |
| INS                | GC            | AMPH               | GC            | SPATS2L            | GC            |
| SNCA               | GC            | GNAI2              | GC            | RAB11FIP2          | GC            |
| PER2               | GC            | RHD                | GC            | INSM1              | GC            |
| MAOA               | GC            | BLK                | GC            | DEFB119            | GC            |
| MECP2              | GC            | PAPPA              | GC            | BPIFB6             | GC            |
| ACE                | GC            | NAT8L              | GC            | SPTSSA             | GC            |
| RYR1               | GC            | CD81               | GC            | VPS37D             | GC            |
| GHRL               | GC            | SHROOM4            | GC            | ELP6               | GC            |
| POMC               | GC            | MGR2               | GC            | TRIM73             | GC            |
| ALB                | GC            | RSPO1              | GC            | STAG3L1            | GC            |
| TH                 | GC            | YWHAH              | GC            | STAG3L4            | GC            |
|                    | GC            |                    |               |                    |               |
| DRD4               | OMIM          | TKT                | GC            | STAG3L2            | GC            |
| DRD3               | GC            | TGM3               | GC            | STAG3L3            | GC            |
| EDN1               | GC            | LOC108663993       | GC            | SPDYE7P            | GC            |
| IL1B               | GC            | PPAN               | GC            | LINC01163          | GC            |
| CACNA1C            | GC            | BCORL1             | GC            | EIF4HP1            | GC            |
| IL10               | GC            | LRP2               | GC            | SPDYE8             | GC            |
| CNTNAP2            | GC            | UGT1A1             | GC            | SPDYE12P           | GC            |
| CRH                | GC            | ADGRA3             | GC            | SPDYE10P           | GC            |
| HLA-DRB1           | GC            | EIF3G              | GC            | ENSG000002669      | GC            |
|                    |               |                    |               | 19                 |               |

|          |    |              |    |              |    |
|----------|----|--------------|----|--------------|----|
| MOG      | GC | PLVAP        | GC | LOC102723692 | GC |
| REN      | GC | YWHAZ        | GC | SPDYE14      | GC |
| FMR1     | GC | ULK4         | GC | SPDYE9       | GC |
| ATXN3    | GC | DLG2         | GC | SPDYE13      | GC |
| GRIN2B   | GC | PCSK9        | GC | SPDYE15      | GC |
| PRKN     | GC | MBL2         | GC | LRP5L        | GC |
| CACNA1A  | GC | ALDH9A1      | GC | ADAMTS12     | GC |
| ANK3     | GC | NQO2         | GC | PGA4         | GC |
| HLA-DQB1 | GC | HIRA         | GC | UBA52        | GC |
| PRODH    | GC | EXT2         | GC | CCNG1        | GC |
| SOD1     | GC | ADCYAP1R1    | GC | KLHL12       | GC |
| NRXN1    | GC | MGR1         | GC | SELENOP      | GC |
| GDNF     | GC | NAALADL2     | GC | MIR494       | GC |
| TPH2     | GC | ACSL4        | GC | PDIA6        | GC |
| POLG     | GC | NR2F2        | GC | SMC4         | GC |
| SLC18A2  | GC | CYC1         | GC | PRDX2        | GC |
| DBH      | GC | MARCKS       | GC | FAU          | GC |
| MTHFR    | GC | MT-TS2       | GC | IL17C        | GC |
| PHOX2B   | GC | RAB3GAP1     | GC | RRAGA        | GC |
| PRL      | GC | NEB          | GC | RRAGB        | GC |
| APP      | GC | DLGAP2       | GC | IMMP1L       | GC |
| CHAT     | GC | CALCR        | GC | TMEM11       | GC |
| UBE3A    | GC | MGR3         | GC | RPS19BP1     | GC |
| DRD5     | GC | MGR12        | GC | PURB         | GC |
| SLC6A2   | GC | MGR8         | GC | SURF4        | GC |
| NTRK2    | GC | CCNA2        | GC | CNOT8        | GC |
| SCN1A    | GC | PARP1        | GC | AUP1         | GC |
| SCN2A    | GC | KALRN        | GC | GEMIN7       | GC |
| PRNP     | GC | WNT7B        | GC | CYTL1        | GC |
| GAD1     | GC | NCAN         | GC | UCN3         | GC |
| NGF      | GC | PPAN-P2RY11  | GC | ACACA        | GC |
| NR3C1    | GC | NFKB1        | GC | RAB28        | GC |
| GFAP     | GC | TMCO1        | GC | DYTN         | GC |
| DNMT1    | GC | MACROD2      | GC | WHCR         | GC |
| CDKL5    | GC | FST          | GC | LRRC4C       | GC |
| EPO      | GC | ARF1         | GC | PSMC3        | GC |
| NOS3     | GC | LOC102724058 | GC | UGT1A        | GC |
| HTT      | GC | KIF7         | GC | DKFZP434H168 | GC |
| CCL2     | GC | SEC61A1      | GC | ASCL2        | GC |
| GRIA3    | GC | NES          | GC | CER1         | GC |
| GCH1     | GC | IL11RA       | GC | DTL          | GC |
| PINK1    | GC | SLC34A1      | GC | ATP6V0E2     | GC |
| GABRA1   | GC | PICSAR       | GC | ZNF620       | GC |
| RAI1     | GC | LINC00163    | GC | RNASE13      | GC |

|          |        |           |    |                   |    |
|----------|--------|-----------|----|-------------------|----|
| LRRK2    | GC     | LINC00165 | GC | RTL10             | GC |
| CRP      | GC     | INPPL1    | GC | PRSS3P2           | GC |
| SCN8A    | GC     | FGF7      | GC | SNORD97           | GC |
| SLC2A1   | GC     | MIR204    | GC | DPYD-AS1          | GC |
| SNAP25   | GC     | EWSR1     | GC | RNASEH2B-AS1      | GC |
| C9orf72  | GC     | RAB7B     | GC | UNC5C             | GC |
| KCNQ2    | GC     | ZBTB24    | GC | ELOVL6            | GC |
| AKT1     | GC     | GRIK5     | GC | ROS1              | GC |
| DISC1    | GC     | FIS1      | GC | SLC25A16          | GC |
| CSNK1D   | GC     | TDP2      | GC | PTPN3             | GC |
| IFNG     | GC     | CASP1     | GC | ZNF622            | GC |
| HTR1A    | GC     | IL17RA    | GC | C17orf80          | GC |
| VWF      | GC     | IL10RA    | GC | PCSK6             | GC |
| SHANK3   | GC     | WNT3      | GC | CNN1              | GC |
| SERPINE1 | GC     | GLT8D1    | GC | NUDT9             | GC |
| APOB     | GC     | NUP155    | GC | ORMDL1            | GC |
| F2       | GC     | MIRLET7I  | GC | FUT1              | GC |
| NOS1     | GC     | GPX1      | GC | COL6A5            | GC |
| CRY1     | GC     | SCZD11    | GC | MIR451A           | GC |
| GABRB3   | GC     | SCZD12    | GC | IRAK3             | GC |
| ICAM1    | GC     | SCZD13    | GC | ATL2              | GC |
| GH1      | GC     | SCZD14    | GC | KRTCAP2           | GC |
| RETN     | GC     | GREM2     | GC | VSTM5             | GC |
| CD40LG   | GC     | PIK3C3    | GC | MIR299            | GC |
| GABRG2   | GC     | PTLS      | GC | PLCXD3            | GC |
| CLOCK    | GC     | XPA       | GC | TPTEP2-<br>CSNK1E | GC |
| FGFR1    | GC     | IDH1      | GC | RRP15             | GC |
| GBA      | GC     | GYPA      | GC | APOA4             | GC |
| CHRNA7   | GC     | INPP1     | GC | PRSS57            | GC |
| SCN9A    | GC     | SLMAP     | GC | MIR519D           | GC |
| FOXP2    | GC     | PYGM      | GC | PRD               | GC |
| POGZ     | GC     | PANK1     | GC | UHRF1             | GC |
| RELN     | GC     | KIF15     | GC | ZKSCAN3           | GC |
| AGT      | GC     | HDAC1     | GC | GTF2H4            | GC |
| HTR2C    | GC TTD | HSPA5     | GC | NET1              | GC |
| ATXN2    | GC     | CPQ       | GC | MDM1              | GC |
| GRIN1    | GC     | RECK      | GC | SLC9B1            | GC |
| PCDH19   | GC     | MIR185    | GC | RPH3A             | GC |
| PDYN     | GC     | EBF3      | GC | CXCL2             | GC |
| STXBP1   | GC     | NAV1      | GC | KAT2A             | GC |
| WFS1     | GC     | DAOA-AS1  | GC | TXNRD1            | GC |
| AR       | GC     | ARMC5     | GC | FLOT1             | GC |
| TP53     | GC     | RBX1      | GC | LOC108660404      | GC |

|            |    |              |    |          |    |
|------------|----|--------------|----|----------|----|
| AHDC1      | GC | VSNL1        | GC | MTHFD1L  | GC |
| FOXG1      | GC | ANCR         | GC | GALR1    | GC |
| FGFR3      | GC | CDR1         | GC | CUTC     | GC |
| NAGLU      | GC | CD38         | GC | YIPF3    | GC |
| ATP13A2    | GC | CDK1         | GC | MS4A4A   | GC |
| ADAMTS2    | GC | ENO1         | GC | UBE2QL1  | GC |
| ERCC6      | GC | SOX5         | GC | CSH2     | GC |
| ESR1       | GC | HSP90B1      | GC | OR14C36  | GC |
| TCF20      | GC | MIR324       | GC | OOEP     | GC |
| DDC        | GC | ATP6AP2      | GC | PPRC1    | GC |
| PMM2       | GC | GPD2         | GC | PCK2     | GC |
| IQSEC2     | GC | AFF4         | GC | STOX2    | GC |
| SLC1A2     | GC | RAPGEF2      | GC | CEND1    | GC |
| TCF4       | GC | PLCG1        | GC | PTPA     | GC |
| PSEN1      | GC | MDGA1        | GC | CD151    | GC |
| MBD5       | GC | GALT         | GC | GIT1     | GC |
| CREBBP     | GC | CACNG5       | GC | ADCY3    | GC |
| TSC2       | GC | CLCF1        | GC | NIPBL-DT | GC |
| ADIPOQ     | GC | SYN3         | GC | EBF1     | GC |
| VCP        | GC | EIF4EBP1     | GC | AMBRA1   | GC |
| DEAF1      | GC | FAF1         | GC | UBR4     | GC |
| TFAP2B     | GC | SFTPD        | GC | CERK     | GC |
| TBP        | GC | LOC109610631 | GC | ARHGAP4  | GC |
| MIR132     | GC | TLR1         | GC | POLD4    | GC |
| RORA       | GC | PDXK         | GC | RAB4A    | GC |
| DCTN1      | GC | CSMD2        | GC | SPAG17   | GC |
| ADNP       | GC | STK39        | GC | CPA4     | GC |
| SNRPN      | GC | CCR7         | GC | IGHG1    | GC |
| ELN        | GC | IL1RAPL2     | GC | ADCY8    | GC |
| RET        | GC | UFD1         | GC | SMDT1    | GC |
| FGFR2      | GC | FLAD1        | GC | PACSIN3  | GC |
| CHD8       | GC | ALK          | GC | MFGE8    | GC |
| EHMT1      | GC | CCNF         | GC | CD3D     | GC |
| CAT        | GC | VIPR2        | GC | WDR48    | GC |
| FLNA       | GC | SUN2         | GC | OTX1     | GC |
| LOC1108062 | GC | MID2         | GC | ABRA     | GC |
| 62         |    |              |    |          |    |
| SYP        | GC | LOC110011216 | GC | IGF2BP3  | GC |
| PARK7      | GC | HTR3C        | GC | ASIC2    | GC |
| HRAS       | GC | GJA8         | GC | GTF3C1   | GC |
| CHRNA4     | GC | ZNF592       | GC | EIPR1    | GC |
| CASK       | GC | HSPB2        | GC | NAP1L5   | GC |
| HTR3A      | GC | ODC1         | GC | WEE1     | GC |
| NIPBL      | GC | VCL          | GC | ZNF275   | GC |

---

|          |    |              |    |              |    |
|----------|----|--------------|----|--------------|----|
| MMP9     | GC | PMS1         | GC | FIBIN        | GC |
| NEXMIF   | GC | LRIT3        | GC | FAM183A      | GC |
| CTLA4    | GC | SLCO1B3      | GC | LOC113960611 | GC |
| ATXN7    | GC | STIN2-VNTR   | GC | MIR130A      | GC |
| CHI3L1   | GC | ALYREF       | GC | ZNF214       | GC |
| AHI1     | GC | RNF19A       | GC | UHRF2        | GC |
| GRN      | GC | JAKMIP1      | GC | ADARB1       | GC |
| TNFRSF1B | GC | CSTA         | GC | TRPC4        | GC |
| HLA-B    | GC | PIEZO2       | GC | FAM53B       | GC |
| TLR4     | GC | CTC1         | GC | SEPTIN12     | GC |
| ALG2     | GC | NELFA        | GC | APPL2        | GC |
| TNFSF4   | GC | KCTD17       | GC | SP3          | GC |
| TARDBP   | GC | RPS15        | GC | CYB5B        | GC |
| ATN1     | GC | GZMB         | GC | LBP          | GC |
| TPH1     | GC | CPLX2        | GC | CISD1        | GC |
| MTOR     | GC | TUBGCP5      | GC | NPBWR1       | GC |
| PRRT2    | GC | DOCK8        | GC | PPP1R3B      | GC |
| VDR      | GC | CPA6         | GC | PRKAB2       | GC |
| TRPV4    | GC | QRICH1       | GC | TCF7         | GC |
| UCHL1    | GC | CACNA1C-AS1  | GC | SMC2         | GC |
| NGLY1    | GC | LOC106020709 | GC | ZNF215       | GC |
| COQ2     | GC | LOC106020710 | GC | GNAI1        | GC |
| FKBP5    | GC | LAPTM4A      | GC | LTB          | GC |
| LMNA     | GC | LOC106627981 | GC | TRPM5        | GC |
| PDSS2    | GC | OLIG2        | GC | PTRH1        | GC |
| ATXN1    | GC | SPTA1        | GC | MEAK7        | GC |
| CTNNB1   | GC | NPM1         | GC | SLC25A5P2    | GC |
| ARNTL    | GC | UCP2         | GC | TFF3         | GC |
| BSCL2    | GC | CISH         | GC | LTB4R        | GC |
| IL1RN    | GC | EPHA4        | GC | GNPDA2       | GC |
| CXCL8    | GC | SCYL1        | GC | PLCL1        | GC |
| IGF2     | GC | ADGRL3       | GC | LCORL        | GC |
| FTL      | GC | DPP10        | GC | SELENOK      | GC |
| GRM1     | GC | HMCN1        | GC | SMC6         | GC |
| SLC17A5  | GC | LOC108745275 | GC | CDC25C       | GC |
| IDUA     | GC | LOC108745276 | GC | IFIT5        | GC |
| TGFB1    | GC | ADAT3        | GC | MYRIP        | GC |
| GNRH1    | GC | EMP1         | GC | MUCL3        | GC |
| GRIK2    | GC | PPCS         | GC | UACA         | GC |
| SGSH     | GC | HOXA13       | GC | GUSBP2       | GC |
| SCN5A    | GC | SH3PXD2B     | GC | WDR70        | GC |
| PTH      | GC | CFAP47       | GC | NRSN1        | GC |
| SHH      | GC | ELP3         | GC | MARCHF11     | GC |
| DYNC1H1  | GC | PRND         | GC | SLC23A3      | GC |

---

|          |        |          |    |                     |    |
|----------|--------|----------|----|---------------------|----|
| IDS      | GC     | ARC      | GC | DDX39B              | GC |
| ARX      | GC     | EN2      | GC | DMRT2               | GC |
| MAGEL2   | GC     | IRAK1    | GC | H2AC15              | GC |
| MFN2     | GC     | SLC32A1  | GC | MYSM1               | GC |
| GNAS     | GC     | AQP1     | GC | ERG28               | GC |
| CP       | GC     | IL9      | GC | CREM                | GC |
| GABRA5   | GC     | DLX5     | GC | AKAP13              | GC |
| DRD1     | GC     | MAPT-AS1 | GC | NACA                | GC |
| SLC25A13 | GC     | DNAJB1   | GC | SPNS3               | GC |
| DHCR7    | GC     | CHRM3    | GC | PLGRKT              | GC |
| SOX2     | GC     | COL9A2   | GC | ANO2                | GC |
| AVP      | GC     | ANGPT2   | GC | BICD1               | GC |
| VEGFA    | GC     | FUT8     | GC | SASH1               | GC |
| NR3C2    | GC     | TNFRSF8  | GC | TLL2                | GC |
| SLC1A3   | GC     | KHDC3L   | GC | ACOX3               | GC |
| ARSA     | GC     | IBSP     | GC | REG1A               | GC |
| MT-ND1   | GC     | ITGAL    | GC | OR51S1              | GC |
| CSNK1E   | GC     | GUF1     | GC | P3H4                | GC |
| KRAS     | GC     | SHMT1    | GC | CISD3               | GC |
| ALG9     | GC     | LHPP     | GC | MIR3911             | GC |
| COL2A1   | GC     | RIT2     | GC | DENND1B             | GC |
| MTNR1A   | GC TTD | BSG      | GC | SMURF1              | GC |
| HDAC4    | GC     | CELF4    | GC | KIR2DL3             | GC |
| PLA2G6   | GC     | TPPP3    | GC | SSTR3               | GC |
| SLC9A6   | GC     | RANGRF   | GC | PTPRT               | GC |
| PTEN     | GC     | UBE2N    | GC | DUOXA1              | GC |
| NPY      | GC     | ERMARD   | GC | CENPBD1             | GC |
| NF1      | GC     | SOCS3    | GC | MIR367              | GC |
| PSEN2    | GC     | ITIH4    | GC | MIR302D             | GC |
| HCRTR2   | GC     | MLX      | GC | LINC01828           | GC |
| TTR      | GC     | FOLH1    | GC | ENSG000002349<br>40 | GC |
| DAOA     | GC     | ITGA1    | GC | ENSG000002307<br>04 | GC |
| SLC6A1   | GC     | GRM8     | GC | ENSG000002861<br>45 | GC |
| NR4A2    | GC     | KANK1    | GC | GRDX                | GC |
| FBN1     | GC     | SLC12A2  | GC | LOC108281110        | GC |
| NEFL     | GC     | FRZB     | GC | CPA5                | GC |
| NDUFS4   | GC     | MT-TQ    | GC | FFAR4               | GC |
| IL13     | GC     | MTMR2    | GC | PAX5                | GC |
| SYN1     | GC     | PPIG     | GC | SLCO1C1             | GC |
| CHKB     | GC     | PLXND1   | GC | COLEC12             | GC |
| APOA1    | GC     | F12      | GC | HEG1                | GC |

|          |                  |          |    |            |    |
|----------|------------------|----------|----|------------|----|
| NKX2-1   | GC               | FAH      | GC | OSBPL5     | GC |
| MRE11    | GC               | TACR2    | GC | CLSTN2     | GC |
| GPHN     | GC               | FKBP4    | GC | P2RY2      | GC |
| DTNBP1   | GC               | ADRA2C   | GC | TSSC4      | GC |
| WDR45    | GC               | FGF1     | GC | PTDSS1     | GC |
| NLGN4X   | GC               | NUP88    | GC | PTPRZ1     | GC |
| DMD      | GC               | AKR1A1   | GC | LHX1       | GC |
| TSC1     | GC               | CANX     | GC | TMEM147    | GC |
| SGCE     | GC               | HLA-DRB5 | GC | SLC22A18AS | GC |
| CHD7     | GC               | NEAT1    | GC | TIMD4      | GC |
| NSD1     | GC               | GADL1    | GC | LAX1       | GC |
| PMP22    | GC               | FTCD     | GC | BNIP3L     | GC |
| SST      | GC               | CFAP43   | GC | SORBS1     | GC |
| PON1     | GC               | ATL3     | GC | COPG2      | GC |
| NDN      | GC               | PCCB     | GC | TRIB1      | GC |
| KCNQ1    | GC               | HOTAIR   | GC | ADAM33     | GC |
| GABRB2   | GC               | NLGN2    | GC | PPM1H      | GC |
| F5       | GC               | PRX      | GC | GCM1       | GC |
|          | GC               |          |    |            |    |
| GABBR2   | OMIM<br>DrugBank | PSMC4    | GC | DCTPP1     | GC |
|          | k                |          |    |            |    |
| IL2RA    | GC               | PENK     | GC | GLYATL1    | GC |
| PAH      | GC               | BCOR     | GC | BABAM1     | GC |
| CACNA1H  | GC               | FNDC5    | GC | PPP1R3D    | GC |
| KCNA1    | GC               | CMIP     | GC | SPCS2      | GC |
| ATP1A3   | GC               | GABRR2   | GC | PGGHG      | GC |
| CABP4    | GC               | LCOR     | GC | ATP11AUN   | GC |
| SPR      | GC               | PLEK     | GC | EMC3       | GC |
| MTR      | GC               | DRC3     | GC | HTR3D      | GC |
| SCN4A    | GC               | LBX1     | GC | PRKCH      | GC |
| TF       | GC               | FABP3    | GC | PRDM13     | GC |
| SQSTM1   | GC               | USP9Y    | GC | GRB7       | GC |
| HLA-DQA1 | GC               | ZMYM2    | GC | GID8       | GC |
| NPAS2    | GC               | PHIP     | GC | TEX28      | GC |
| GNB3     | GC               | UPK3A    | GC | RABL2B     | GC |
| DLG3     | GC               | PECAM1   | GC | C16orf87   | GC |
| SLC1A1   | GC               | IVL      | GC | SPRY4-IT1  | GC |
| TSPO     | GC               | DAZ1     | GC | NFATC2     | GC |
| ZNF365   | GC               | DUSP6    | GC | EFNA4      | GC |
| AUTS2    | GC               | SLC19A3  | GC | PDCD6IP    | GC |
| TOR1A    | GC               | CPT1A    | GC | MIR708     | GC |
| GGT1     | GC               | DHTKD1   | GC | COPA       | GC |
| SYT1     | GC               | NFIA     | GC | RNF138     | GC |

|         |        |                     |    |                     |    |
|---------|--------|---------------------|----|---------------------|----|
| ALG6    | GC     | MYRF                | GC | AP1S3               | GC |
| SYNGAP1 | GC     | SCARB1              | GC | PLLP                | GC |
| FOS     | GC     | DCANP1              | GC | STRN                | GC |
| SLC6A8  | GC     | DBN1                | GC | SMC1B               | GC |
| HCRTR1  | GC TTD | EEF1A1              | GC | GPR107              | GC |
| TBC1D24 | GC     | CCN2                | GC | FXYD7               | GC |
| SHANK2  | GC     | ENSG000002024<br>98 | GC | ZNF695              | GC |
| CNR1    | GC     | DPYSL5              | GC | MARVELD3            | GC |
| ARID1B  | GC     | UBE2D2              | GC | DSCC1               | GC |
| MPO     | GC     | SEMA3E              | GC | RABL2A              | GC |
| RUNX1   | GC     | TARS1               | GC | ENSG000002522<br>83 | GC |
| CRY2    | GC     | MYO1E               | GC | TLN2                | GC |
| PANK2   | GC     | CYP1B1              | GC | C1orf94             | GC |
| AGRN    | GC     | ADRA2B              | GC | CYP4F3              | GC |
| ACADM   | GC     | KIF2A               | GC | RNF166              | GC |
| HTR1B   | GC     | SMCR8               | GC | ADH5P2              | GC |
| EP300   | GC     | PSMD2               | GC | NOX4                | GC |
| EDNRB   | GC     | HBS1L               | GC | PKD1L2              | GC |
| GJB1    | GC     | AGXT                | GC | VPS52               | GC |
| FUS     | GC     | MIR181A1            | GC | ADPRH               | GC |
| HMOX1   | GC     | TLK2                | GC | TPRN                | GC |
| ALG13   | GC     | SEC24C              | GC | AKAP6               | GC |
| MAOB    | GC     | MARS1               | GC | CAMK1D              | GC |
| DISC2   | GC     | LORICRIN            | GC | MBD3                | GC |
| NPPA    | GC     | GBA2                | GC | PTPRS               | GC |
| MAN1B1  | GC     | LAMB1               | GC | PASK                | GC |
| VPS13A  | GC     | MIEF2               | GC | GSDMB               | GC |
| TFRC    | GC     | CYB5R3              | GC | TMEM14A             | GC |
| BRAF    | GC     | DCC                 | GC | GUSBP15             | GC |
| BRCA2   | GC     | CCKBR               | GC | BAAT                | GC |
| KCNQ3   | GC     | CNTFR               | GC | SLC8A1              | GC |
| NLGN3   | GC     | IL12B               | GC | FGF19               | GC |
| CYBB    | GC     | FOXO3               | GC | LIME1               | GC |
| HADHA   | GC     | TOX3                | GC | FBXO15              | GC |
| TTN     | GC     | HEXB                | GC | OFCC1               | GC |
| SLITRK1 | GC     | IRF4                | GC | INTS3               | GC |
| HFE     | GC     | SMIM30              | GC | ODAM                | GC |
| NAGS    | GC     | MLH3                | GC | OARD1               | GC |
| PNKD    | GC     | GPR37               | GC | TMEM128             | GC |
| MYH9    | GC     | DEL1Q21             | GC | SVBP                | GC |
| TLR2    | GC     | LOC108660406        | GC | DTD1                | GC |
| SCN3A   | GC     | RREB1               | GC | FAF2                | GC |



|          |        |              |    |              |    |
|----------|--------|--------------|----|--------------|----|
| COL1A1   | GC     | AFG3L2       | GC | LOC109611589 | GC |
| NPC1     | GC     | ERDA1        | GC | MIR19B1      | GC |
| PLP1     | GC     | COX5A        | GC | USP25        | GC |
| DMPK     | GC     | VGF          | GC | TOP1MT       | GC |
| P2RY11   | GC     | PSMD3        | GC | CCR10        | GC |
| MPI      | GC     | APEX1        | GC | ASPG         | GC |
| NOTCH1   | GC     | SGK1         | GC | OST4         | GC |
| MEN1     | GC     | GNA11        | GC | GUSBP4       | GC |
| DPP6     | GC     | CD63         | GC | MIR6084      | GC |
| MC4R     | GC     | CDR2         | GC | NOSTRIN      | GC |
| TAC1     | GC     | NOG          | GC | CXADR        | GC |
| MKRN3    | GC     | KLHL24       | GC | CERS6        | GC |
| SERPINC1 | GC     | ARHGAP24     | GC | DCDC2B       | GC |
| CDK5     | GC     | SKOR1        | GC | TMC5         | GC |
| GABRD    | GC     | CHRNA4       | GC | ATRNL1       | GC |
| PAX6     | GC     | DYNC2H1      | GC | RPN1         | GC |
| NOS2     | GC     | SCAP         | GC | NRF1         | GC |
| U2AF1    | GC     | TET1         | GC | ARL6IP5      | GC |
| HERC2    | GC     | SERPINF1     | GC | RHOF         | GC |
| RUNX2    | GC     | H3-2         | GC | MAK16        | GC |
| ATRX     | GC     | SBF2         | GC | SMIM23       | GC |
| MMP2     | GC     | SPRY2        | GC | KCNA6        | GC |
| COL3A1   | GC     | PCSK1        | GC | SLC35F4      | GC |
| HCN1     | GC     | CARTPT       | GC | DUX4L1       | GC |
| SLC5A7   | GC     | NT5M         | GC | FAM149A      | GC |
| FA2H     | GC     | LINC02153    | GC | STPG3        | GC |
| KCNH2    | GC TTD | ADCY1        | GC | WFDC21P      | GC |
| SYNJ1    | GC     | MIR26B       | GC | LINC00976    | GC |
| CAV3     | GC     | CIC          | GC | RACK1        | GC |
| TAF1     | GC     | RAB18        | GC | TYW5         | GC |
| TG       | GC     | SLC9A3       | GC | F2RL2        | GC |
| PCLO     | GC     | ITSN2        | GC | RAD54L2      | GC |
| SNCAIP   | GC     | MYO15A       | GC | C8orf37-AS1  | GC |
| OXT      | GC     | LOC106050102 | GC | L3MBTL4      | GC |
| TYR      | GC     | RBM4         | GC | GTF2H1       | GC |
| CDH23    | GC     | AFG1L        | GC | PXDNL        | GC |
| HGSNAT   | GC     | SEMA4A       | GC | TIMM17A      | GC |
| CTSD     | GC     | NUDT1        | GC | CBLB         | GC |
| EGF      | GC     | CYSLTR1      | GC | ING3         | GC |
| PPT1     | GC     | SORCS2       | GC | SLC25A40     | GC |
| MEF2C    | GC     | CAMP         | GC | MTCL1        | GC |
| AANAT    | GC     | CORT         | GC | DUSP3        | GC |
| MPZ      | GC     | CD14         | GC | SLC22A2      | GC |
| SRPX2    | GC     | GRID1        | GC | PPP1R27      | GC |

|          |    |                    |    |            |    |
|----------|----|--------------------|----|------------|----|
| GNS      | GC | MIR146B            | GC | IMMT       | GC |
| GNAO1    | GC | RPS6               | GC | DCT        | GC |
| PSAP     | GC | LIPC               | GC | GOLIM4     | GC |
| TPO      | GC | ARHGEF6            | GC | SLC9A8     | GC |
| ITGB3    | GC | PTX3               | GC | TCF15      | GC |
| SMC3     | GC | FH                 | GC | MLLT10     | GC |
| PTPN11   | GC | BECN1              | GC | TP53RK     | GC |
| BHLHE41  | GC | NMB                | GC | CAMK4      | GC |
| EPRS1    | GC | TRMT10C            | GC | TRA        | GC |
| ADORA2A  | GC | DCLK1              | GC | NOP9       | GC |
| TUSC3    | GC | IGF2BP2            | GC | RPL3       | GC |
| SOX3     | GC | RIC3               | GC | BMP8B      | GC |
| ALG11    | GC | HNRNPUL2-<br>BSCL2 | GC | NSMCE4A    | GC |
| CHMP2B   | GC | PCDH15             | GC | YIPF6      | GC |
| SMPD1    | GC | ST8SIA2            | GC | ZUP1       | GC |
| CACNB2   | GC | CAPN2              | GC | KPNA7      | GC |
| FAS      | GC | IKZF3              | GC | RAPGEF6    | GC |
| KDM5C    | GC | YWHAB              | GC | MCC        | GC |
| HMBS     | GC | MYL1               | GC | SLC24A2    | GC |
| SLC9A7   | GC | FYN                | GC | VPS50      | GC |
| CALR     | GC | KIF3A              | GC | ZWINT      | GC |
| CYP2D6   | GC | RBMY1A1            | GC | KANSL1-AS1 | GC |
| ASCL1    | GC | CADPS2             | GC | SLC29A4    | GC |
| BMP2     | GC | PSMD14             | GC | TXNDC2     | GC |
| MED12    | GC | SLC1A7             | GC | EPHA1      | GC |
| GNAL     | GC | OMD                | GC | RBFOX2     | GC |
| SMARCA2  | GC | CCND2              | GC | HLA-S      | GC |
| LDLR     | GC | PARS2              | GC | TFAP2C     | GC |
| IREB2    | GC | STRADA             | GC | CYP39A1    | GC |
| NTRK1    | GC | SPON1              | GC | IDNK       | GC |
| CLCN2    | GC | KCNK5              | GC | DUSP26     | GC |
| TNFRSF1A | GC | MOBP               | GC | TMEM134    | GC |
| RAB39B   | GC | TMEM138            | GC | ABHD14A    | GC |
| SPTAN1   | GC | LRRTM1             | GC | ABHD18     | GC |
| MIR21    | GC | HDAC2              | GC | CCDC177    | GC |
| PTCHD1   | GC | SIGLEC5            | GC | ZIM2-AS1   | GC |
| PRPS1    | GC | MAPRE3             | GC | SLC2A1-AS1 | GC |
| GHR      | GC | VPS51              | GC | MESTIT1    | GC |
| KCNT1    | GC | PHGDH              | GC | LRIG2      | GC |
| CBL      | GC | PIKFYVE            | GC | IRX1       | GC |
| H2AC18   | GC | TLX3               | GC | PLPPR5     | GC |
| NPC2     | GC | PTCH2              | GC | FHAD1      | GC |
| RBFOX1   | GC | IL4R               | GC | WSCD2      | GC |

|          |          |            |    |           |    |
|----------|----------|------------|----|-----------|----|
| CHRN2    | GC       | LIG3       | GC | CD180     | GC |
| GNE      | GC       | PIR        | GC | DPEP1     | GC |
| RYR2     | GC       | TOMM40     | GC | TLL1      | GC |
| ADRB2    | GC TTD   | ARTN       | GC | CSNK1A1   | GC |
| HLA-DPB1 | GC       | DEL15Q11.2 | GC | CCDC136   | GC |
| STAT3    | GC       | LINC01108  | GC | PKP4      | GC |
| IL2      | GC       | LINC02152  | GC | RND3      | GC |
|          | GC       |            |    |           |    |
| GABBR1   | DrugBank | CNNM2      | GC | CBY1      | GC |
|          | k        |            |    |           |    |
| MT-ATP6  | GC       | KLF4       | GC | DDR1      | GC |
| GRIA4    | GC       | UTRN       | GC | STK4      | GC |
| GABRA2   | GC       | EEA1       | GC | SERPINA12 | GC |
| TPP1     | GC       | ACMSD      | GC | BTC       | GC |
| HNMT     | GC       | COPS3      | GC | KIR2DL4   | GC |
| CACNB4   | GC       | KLK6       | GC | ADAMTS16  | GC |
| GLA      | GC       | RNF2       | GC | HSD17B1   | GC |
| CLN5     | GC       | ADRA1D     | GC | TMCO4     | GC |
| HSPD1    | GC       | TLR7       | GC | TCFL5     | GC |
| DPAGT1   | GC       | VIPR1      | GC | MIR302CHG | GC |
| GJA1     | GC       | GRIK3      | GC | ANAPC1    | GC |
| FN1      | GC       | DDIT3      | GC | IFI16     | GC |
| TRAPPC9  | GC       | TIMP2      | GC | LINC01194 | GC |
| SRC      | GC       | EHMT2      | GC | QTRT1     | GC |
| PNKP     | GC       | HLA-DRA    | GC | PRELP     | GC |
| MT-CO1   | GC       | KDSR       | GC | CSAG1     | GC |
| MAG      | GC       | CS         | GC | GOPC      | GC |
| MT-ND5   | GC       | PMCH       | GC | PSMD8     | GC |
| CREB1    | GC       | PCDH11X    | GC | OSMR      | GC |
| DHX30    | GC       | LCN2       | GC | BTRC      | GC |
| MT-TL1   | GC       | GLRA2      | GC | KCNMB1    | GC |
| HSPG2    | GC       | APELA      | GC | APCS      | GC |
| SPG11    | GC       | GLS        | GC | ITPK1     | GC |
| FRRS1L   | GC       | ARHGAP11A  | GC | NGB       | GC |
| SLC18A3  | GC       | CRKL       | GC | PRDM4     | GC |
| KCNJ11   | GC       | FCER2      | GC | LGALS13   | GC |
| RERE     | GC       | LINC02694  | GC | CHRAC1    | GC |
| TSHR     | GC       | IER3       | GC | SAMD8     | GC |
| MOGS     | GC       | CXCL1      | GC | MRXSL     | GC |
| MAP2K1   | GC       | PRDM12     | GC | APBB2     | GC |
| CASR     | GC       | CAMTA1     | GC | ADORA3    | GC |
| DAO      | GC       | NUP93      | GC | ENTPD5    | GC |
| CLN3     | GC       | TUBB8      | GC | TTC9B     | GC |
| ATXN8OS  | GC       | CHERP      | GC | ZNF428    | GC |

|          |          |              |    |            |    |
|----------|----------|--------------|----|------------|----|
| ABCA1    | GC       | LOC106020711 | GC | TICAM1     | GC |
| XBP1     | GC       | LOC106020712 | GC | NAA20      | GC |
| KMT2A    | GC       | MDH1         | GC | SLC2A13    | GC |
| ECE1     | GC       | KDR          | GC | HSD3B1     | GC |
| ALDH5A1  | GC       | PSMD9        | GC | TIPIN      | GC |
| CYP19A1  | GC       | BBS12        | GC | PTGFR      | GC |
| PWRN1    | GC       | FCGR3A       | GC | TWISTNB    | GC |
| FOXP3    | GC       | TOR1B        | GC | PRTFDC1    | GC |
| NKX2-5   | GC       | MCL1         | GC | CA6        | GC |
| GALNS    | GC       | KIF1C        | GC | SMAD7      | GC |
| VPS35    | GC       | AS3MT        | GC | DIAPH3     | GC |
| CYP17A1  | GC       | PNMA2        | GC | PELI2      | GC |
| MYH7     | GC       | VTN          | GC | CERS5      | GC |
| VPS13B   | GC       | PACRG        | GC | PLEKHA8    | GC |
| EGR2     | GC       | SRR          | GC | CCPG1      | GC |
| LTA      | GC       | MIR328       | GC | ARHGAP36   | GC |
| FGF8     | GC       | FTMT         | GC | OR5AS1     | GC |
| COG2     | GC       | CCL18        | GC | TMEM266    | GC |
| OPN4     | GC       | SORCS1       | GC | DBH-AS1    | GC |
| IGFBP3   | GC       | ALDH1A1      | GC | CADM3-AS1  | GC |
| SOX10    | GC       | MESD         | GC | PAFAH1B1P2 | GC |
| OPHN1    | GC       | CYBA         | GC | ARHGAP1    | GC |
| PROP1    | GC       | ACTC1        | GC | ACOX2      | GC |
| HTRA2    | GC       | CFL1         | GC | PSG1       | GC |
| PLAU     | GC       | DDHD2        | GC | SLC28A1    | GC |
| P2RX7    | GC       | PSMD5        | GC | SLC3A2     | GC |
| NIPA1    | GC       | LYN          | GC | TMEM18     | GC |
| CASP8    | GC       | RPS6KB2      | GC | PEG13      | GC |
| ACHE     | GC       | CD86         | GC | ANKRD44    | GC |
| CFI      | GC       | CELF1        | GC | TUBGCP6    | GC |
| GIGYF2   | GC       | IL33         | GC | FREM3      | GC |
| CACNA1S  | GC       | RPS6KB1      | GC | ZNRD1      | GC |
| FKRP     | GC       | PPIEL        | GC | NPFFR1     | GC |
| CYP21A2  | GC       | GATA3        | GC | ACTR5      | GC |
| SERPINA1 | GC       | MIR27A       | GC | YEATS4     | GC |
| FLCN     | GC       | NSF          | GC | OTOG       | GC |
| COL1A2   | GC       | BTBD16       | GC | CSNK1A1L   | GC |
| QDPR     | GC       | NRP1         | GC | UFL1       | GC |
|          | GC       |              |    |            |    |
| KCNA2    | DrugBank | RIN2         | GC | PIN1       | GC |
|          | k        |              |    |            |    |
| SMARCB1  | GC       | ARRB2        | GC | PCMT1      | GC |
| PROK2    | GC       | HSD17B3      | GC | GTDC1      | GC |
| SELP     | GC       | DENND5A      | GC | CHD9       | GC |

---

|          |    |         |    |              |    |
|----------|----|---------|----|--------------|----|
| THRB     | GC | TAT     | GC | ATP10B       | GC |
| FXN      | GC | FGF9    | GC | HCAR2        | GC |
| SLC35A1  | GC | DRG2    | GC | ENTPD4       | GC |
| MT-TK    | GC | RGS2    | GC | BAZ1A        | GC |
| COL5A1   | GC | DAPK1   | GC | PPARGC1B     | GC |
| SCN1B    | GC | TJP1    | GC | TUSC1        | GC |
| HPRT1    | GC | FGD4    | GC | SUPT16H      | GC |
| GPT      | GC | PLA2G2A | GC | TRAPPC12     | GC |
| SETD5    | GC | ALDH3A1 | GC | DOC2A        | GC |
| RAPSN    | GC | ITGAX   | GC | DCTD         | GC |
| BRCA1    | GC | LLGL1   | GC | SEMA6D       | GC |
| APC      | GC | EXT1    | GC | LOC101927066 | GC |
| TBX1     | GC | TENT5A  | GC | TANC2        | GC |
| ADRB1    | GC | CYB561  | GC | TFF2         | GC |
| KIF1A    | GC | ATG4C   | GC | NPY2R        | GC |
| LPL      | GC | RPS20   | GC | MAP9         | GC |
| OPRM1    | GC | VAMP7   | GC | IL21-AS1     | GC |
| POU1F1   | GC | LRRK1   | GC | CD3G         | GC |
| GLUD1    | GC | TAF6    | GC | ELFN1        | GC |
| SMC1A    | GC | VDAC1   | GC | ASCL3        | GC |
| ALS2     | GC | MICB    | GC | UNK          | GC |
| MUSK     | GC | SETDB1  | GC | WDYHV1       | GC |
| ABAT     | GC | INSL3   | GC | NDUFA5       | GC |
| SELENON  | GC | POSTN   | GC | DSEL         | GC |
| CC2D2A   | GC | SH2B1   | GC | SLC25A2      | GC |
| NRG1     | GC | TBX3    | GC | HLA-DRB4     | GC |
| ASPM     | GC | MAFA    | GC | OR6P1        | GC |
| CRHR1    | GC | SRF     | GC | ARHGEF40     | GC |
| SEMA3A   | GC | CTSG    | GC | RHBDF1       | GC |
| LEPR     | GC | CADM1   | GC | CCHCR1       | GC |
| SLC25A22 | GC | SULT2A1 | GC | C19orf33     | GC |
| SPG7     | GC | TLR10   | GC | NUCB2        | GC |
| SUMF1    | GC | DMRT1   | GC | ECI2         | GC |
| NALCN    | GC | KCNH5   | GC | RFTN2        | GC |
| KCNJ2    | GC | NBEA    | GC | CYLC2        | GC |
| CHRNA2   | GC | TRPM8   | GC | RAP2C        | GC |
| HLA-A    | GC | TCF12   | GC | METTL7B      | GC |
| PIK3CA   | GC | H2AC20  | GC | SLC25A41     | GC |
| ADORA1   | GC | CDH10   | GC | CCDC70       | GC |
| CTCF     | GC | TINF2   | GC | LIPG         | GC |
| NPS      | GC | PDLIM1  | GC | TMEM132B     | GC |
| HSPB1    | GC | MTMR10  | GC | TEC          | GC |
| SRD5A3   | GC | MIR326  | GC | RFX4         | GC |
| ASPA     | GC | TXNDC15 | GC | RPL13        | GC |

---

|            |        |                 |    |              |    |
|------------|--------|-----------------|----|--------------|----|
| ABCB7      | GC     | ID2             | GC | CBX5         | GC |
| ATXN10     | GC     | OLR1            | GC | CLYBL        | GC |
| VPS13C     | GC     | ENSG00000277767 | GC | FABP1        | GC |
| FOXP1      | GC     | MCAM            | GC | DDRKG1       | GC |
| ADH1C      | GC     | GPER1           | GC | METTL21C     | GC |
| CFTR       | GC     | HTR3E           | GC | PTGER2       | GC |
| NEFH       | GC     | WDPCP           | GC | DYNLT1       | GC |
| CLCN1      | GC     | ARHGAP11B       | GC | ERC2         | GC |
| S100B      | GC     | PWARSN          | GC | CEP128       | GC |
| SLC25A1    | GC     | RAD23A          | GC | LGR6         | GC |
| ANK2       | GC     | TLR8            | GC | PLEKHH2      | GC |
| THBD       | GC     | HIP1R           | GC | TMEM184B     | GC |
| HDC        | GC     | SMARCA1         | GC | FBXL18       | GC |
| DEPDC5     | GC     | DLX1            | GC | DPH3         | GC |
| LMX1B      | GC     | NR4A1           | GC | FBXO48       | GC |
| SNORD115-1 | GC     | NREP            | GC | MIR639       | GC |
| MT-CYB     | GC     | CLEC16A         | GC | CPEB1-AS1    | GC |
| STS        | GC     | PHF1            | GC | LOC107181287 | GC |
| PTS        | GC     | ARHGEF15        | GC | APOM         | GC |
| STAT1      | GC     | PDE11A          | GC | APEH         | GC |
| PAFAH1B1   | GC     | MBNL1           | GC | HSP90AB2P    | GC |
| ATP7A      | GC     | TRIM21          | GC | MROH6        | GC |
| GSN        | GC     | ACP1            | GC | LINC00051    | GC |
| NPPB       | GC     | SRGAP2          | GC | GNLY         | GC |
| F8         | GC     | PUS3            | GC | GALR3        | GC |
| SERPINA3   | GC     | P2RX4           | GC | SEC23IP      | GC |
| SOX9       | GC     | BRAT1           | GC | NMU          | GC |
| GABRA3     | GC TTD | SYK             | GC | LINC02210    | GC |
| SATB2      | GC     | FHL5            | GC | LILRB1       | GC |
| NR1D1      | GC     | WHRN            | GC | ACSL3        | GC |
| NR5A1      | GC     | SYNE2           | GC | LOC109623489 | GC |
| SYT2       | GC     | GGTLC3          | GC | MARCHF6      | GC |
| ARSB       | GC     | RASD1           | GC | TMSB4X       | GC |
| MFSD8      | GC     | SMCR5           | GC | PIGF         | GC |
| FKTN       | GC     | MEG8            | GC | UBQLNL       | GC |
| MYH6       | GC     | TUBB            | GC | RTN1         | GC |
| TNFRSF11B  | GC     | FCRL3           | GC | PPP2R3A      | GC |
| CACNA1B    | GC     | GRIN2C          | GC | LINC02288    | GC |
| ZEB2       | GC     | HTR1E           | GC | EHD3         | GC |
| RAB7A      | GC     | MIEF1           | GC | SPCS3        | GC |
| CPT2       | GC     | GYPC            | GC | DOCK1        | GC |

|         |    |         |    |          |    |
|---------|----|---------|----|----------|----|
| SLC11A2 | GC | EGR1    | GC | ATP8B3   | GC |
| BTD     | GC | IRF1    | GC | KPNA3    | GC |
| RPS6KA3 | GC | EPB41   | GC | SLC28A2  | GC |
| TACR1   | GC | CLCN6   | GC | MIR452   | GC |
| WASHC5  | GC | PARL    | GC | HAGH     | GC |
| MSX1    | GC | POU3F3  | GC | PPM1B    | GC |
| CST3    | GC | DLX6    | GC | UBE2D4   | GC |
| PRKCG   | GC | AIM2    | GC | SCAMP5   | GC |
| TWNK    | GC | LINGO2  | GC | FCRL4    | GC |
| KAT6B   | GC | GGT2    | GC | ZCCHC24  | GC |
| HESX1   | GC | ANXA2   | GC | PATJ     | GC |
| MT-ND6  | GC | CALCRL  | GC | DYNC1I1  | GC |
| DYRK1A  | GC | LMAN1   | GC | C12orf50 | GC |
| AFF2    | GC | PRG2    | GC | SPAG16   | GC |
| ANKRD11 | GC | CD44    | GC | IFNGR2   | GC |
| SLC26A4 | GC | ARFGAP1 | GC | CD109    | GC |
| MDM2    | GC | POU5F1  | GC | KCNN2    | GC |
| OTX2    | GC | RAC1    | GC | FOXN3    | GC |
| CLN6    | GC | SLC2A3  | GC | SLC22A14 | GC |
| SYN2    | GC | CA8     | GC | ANKRD60  | GC |
| HAMP    | GC | P2RX3   | GC | AHRR     | GC |
| EIF4G1  | GC | GSTO1   | GC | NANOG    | GC |
| F9      | GC | ALKBH5  | GC | CDH11    | GC |
| FLII    | GC | PGD     | GC | CACNA2D3 | GC |
| SLC12A3 | GC | PTPRO   | GC | MELTF    | GC |
| F10     | GC | FRMPD4  | GC | UBA7     | GC |
| ST3GAL3 | GC | NAA50   | GC | PECR     | GC |
| SPAST   | GC | ADIPOR2 | GC | GNG5     | GC |
| H19     | GC | PRKACG  | GC | FAM126B  | GC |
| CCR1    | GC | CUL1    | GC | PSORS1C1 | GC |
| MYO9A   | GC | SPTB    | GC | PXK      | GC |
| LOX     | GC | AKR1C2  | GC | HTRA4    | GC |
| KMT2D   | GC | STBD1   | GC | C15orf39 | GC |
| GRM5    | GC | IL31    | GC | GUCY1A2  | GC |
| AQP4    | GC | NEDD4L  | GC | SDK1     | GC |
| C3      | GC | DUPD1   | GC | GP2      | GC |
| EPM2A   | GC | RXRB    | GC | SGCZ     | GC |
| FASLG   | GC | CCL22   | GC | IFI44    | GC |
| PNPO    | GC | WRNIP1  | GC | CCN3     | GC |
| DOK7    | GC | CBFB    | GC | ATIC     | GC |
| GLUL    | GC | UBN2    | GC | WWC1     | GC |
| GJB2    | GC | PTPRN   | GC | ANP32A   | GC |
| CTSH    | GC | ELAVL4  | GC | RAD51B   | GC |
| PLG     | GC | FEV     | GC | PACSIN1  | GC |

|          |    |          |    |           |    |
|----------|----|----------|----|-----------|----|
| CLCNKB   | GC | MUC5AC   | GC | URM1      | GC |
| FAN1     | GC | CACNA1I  | GC | PLAC1     | GC |
| STAG2    | GC | GRM4     | GC | PCDHGB3   | GC |
| VAMP1    | GC | SUCLG1   | GC | LINC01094 | GC |
| MIR22    | GC | GLRX5    | GC | SRI       | GC |
| CCK      | GC | GALNT17  | GC | AK2       | GC |
| B2M      | GC | ALS3     | GC | ADAM8     | GC |
| FLNB     | GC | KCTD13   | GC | HPSE      | GC |
| DNA2     | GC | KLRK1    | GC | TCF19     | GC |
| SPP1     | GC | NDRG1    | GC | NEBL      | GC |
| C19orf12 | GC | HPGDS    | GC | THOC1     | GC |
| SNCB     | GC | CALY     | GC | ADCK1     | GC |
| GAMT     | GC | SGCD     | GC | PSORS1C2  | GC |
| PCNT     | GC | DLEU2    | GC | NUP153    | GC |
| ATP2A2   | GC | CTSL     | GC | ARRB1     | GC |
| HDAC8    | GC | GRIN3A   | GC | KBTBD8    | GC |
| SYNE1    | GC | HSPE1    | GC | SOCS6     | GC |
| AGTR1    | GC | NR1I2    | GC | MYO10     | GC |
| PROKR2   | GC | ARFGAP3  | GC | MT2A      | GC |
| TGFBR2   | GC | YUHAL    | GC | GRK5      | GC |
| HBB      | GC | USP6     | GC | CPVL      | GC |
| CDKN1C   | GC | NCS1     | GC | FER       | GC |
| IL7      | GC | REL      | GC | SLC4A7    | GC |
| NHLRC1   | GC | HSD17B12 | GC | CDK5R1    | GC |
| THAP1    | GC | CNP      | GC | TPP2      | GC |
| SLC35A2  | GC | CCL26    | GC | CCDC33    | GC |
| FBXO7    | GC | HDAC3    | GC | KCTD8     | GC |
| CLN8     | GC | VAR51    | GC | BCL2L13   | GC |
| MAP2K2   | GC | UBQLN1   | GC | NPFFR2    | GC |
| RAD21    | GC | NT5C1A   | GC | SLC25A31  | GC |
| ZNF804A  | GC | SSTR5    | GC | RABIF     | GC |
| VCAM1    | GC | GJD2     | GC | SENP7     | GC |
| AQP2     | GC | H4-16    | GC | NETO2     | GC |
| CD36     | GC | UROS     | GC | OR52B2    | GC |
| PDGFRB   | GC | NPPC     | GC | NPBWR2    | GC |
| FLI1     | GC | KCNJ12   | GC | CYHR1     | GC |
| DNAJC13  | GC | FEZ1     | GC | MS4A6E    | GC |
| GAD2     | GC | TEK      | GC | NUDT17    | GC |
| ARHGEF9  | GC | PRIMA1   | GC | DGAT2L6   | GC |
| NPHP1    | GC | MMP8     | GC | FAM187B   | GC |
| ZNF41    | GC | RECQL    | GC | OR5K1     | GC |
| GLB1     | GC | RPA1     | GC | PLAC8L1   | GC |
| PTPN22   | GC | APH1A    | GC | FAM228A   | GC |
| SCN4B    | GC | GNB1L    | GC | OR2T4     | GC |



|         |    |          |    |                 |    |
|---------|----|----------|----|-----------------|----|
| KANSL1  | GC | PEG3     | GC | MTRNR2L3        | GC |
| CHRNA1  | GC | PTPRN2   | GC | C8orf17         | GC |
| FGF10   | GC | MT3      | GC | DLEU1-AS1       | GC |
| IL4     | GC | TOMM20   | GC | YWHAEP7         | GC |
| MCOLN1  | GC | RTL1     | GC | MIR4325         | GC |
| LAMA2   | GC | WNT2     | GC | MIR4539         | GC |
| ATP1A2  | GC | OGG1     | GC | LOC101927055    | GC |
| IL2RB   | GC | DST      | GC | CEACAMP8        | GC |
| SCN11A  | GC | SCGB1A1  | GC | FLT1P1          | GC |
| HRH3    | GC | TOP2B    | GC | RASSF1          | GC |
| DPYD    | GC | BCL2A1   | GC | MAGEA9          | GC |
| TSPYL1  | GC | RNF112   | GC | CDC42EP3        | GC |
| WASHC4  | GC | MIR338   | GC | IL37            | GC |
| PDGFB   | GC | MLC1     | GC | PDZD2           | GC |
| G6PC    | GC | THBS1    | GC | RNF185          | GC |
| NTF3    | GC | RPL38    | GC | NALCN-AS1       | GC |
| NSUN2   | GC | USP27X   | GC | INMT            | GC |
| NDP     | GC | WASHC1   | GC | MT1F            | GC |
| XK      | GC | LINC-ROR | GC | DCP1B           | GC |
| GUSB    | GC | TSLP     | GC | KPNB1           | GC |
| GRIN2D  | GC | GLP1R    | GC | AOC1            | GC |
| TRIM8   | GC | MIR485   | GC | POLL            | GC |
| SPG21   | GC | NRCAM    | GC | ENSG00000286192 | GC |
| LAMB2   | GC | COQ4     | GC | MALRD1          | GC |
| THPO    | GC | ATG12    | GC | UBXN7           | GC |
| RBFOX3  | GC | APOA5    | GC | LINC00243       | GC |
| DNM1    | GC | ALS7     | GC | RASSF8          | GC |
| TWIST1  | GC | SUCLA2   | GC | MYO3A           | GC |
| NDUFV2  | GC | RPS6KA1  | GC | RHOT1           | GC |
| CYP11A1 | GC | NBEAL1   | GC | SNX7            | GC |
| CHRNE   | GC | SLC7A5   | GC | MDM4            | GC |
| LAMP2   | GC | PRKACA   | GC | MAIP1           | GC |
| COLQ    | GC | SMAD2    | GC | CPSF7           | GC |
| SLC6A5  | GC | SULT4A1  | GC | TCTA            | GC |
| RPS27A  | GC | SORT1    | GC | BAIAP2L1        | GC |
| IL17A   | GC | MIA2     | GC | DCHS2           | GC |
| GDAP1   | GC | TTN-AS1  | GC | GPR139          | GC |
| WT1     | GC | SLC2A4   | GC | BSN             | GC |
| CRYAB   | GC | ADIPOR1  | GC | MNDA            | GC |
| FBN2    | GC | CGAS     | GC | CWC27           | GC |
| ACADS   | GC | GLIS3    | GC | ARL4A           | GC |

|           |    |         |    |           |    |
|-----------|----|---------|----|-----------|----|
| GATA4     | GC | GRD1    | GC | BRMS1L    | GC |
| ESR2      | GC | ALLC    | GC | HDX       | GC |
| RSRC1     | GC | PRSS3   | GC | CDC14C    | GC |
| ADSL      | GC | NAPB    | GC | NDUFA8    | GC |
| SUFU      | GC | CLINT1  | GC | SP110     | GC |
| NOTCH3    | GC | FURIN   | GC | NRN1      | GC |
| DNAJC6    | GC | NAGPA   | GC | HLF       | GC |
| TNNT2     | GC | RAB10   | GC | AK5       | GC |
| IQCB1     | GC | UNG     | GC | SPECC1    | GC |
| SLC12A5   | GC | PPIP5K2 | GC | ATRN      | GC |
| PITX2     | GC | MRPS22  | GC | LPAR1     | GC |
| CNKS2     | GC | NCAPD2  | GC | F8A1      | GC |
| PHOX2A    | GC | CAMK2G  | GC | LINC01122 | GC |
| GSK3B     | GC | ITGA4   | GC | ACKR2     | GC |
| CACNA1D   | GC | BAMBI   | GC | PGRMC1    | GC |
| SIN3A     | GC | LMO1    | GC | LOC643542 | GC |
| GLRB      | GC | TUBA1B  | GC | PKD2L1    | GC |
| OXTR      | GC | CDH8    | GC | ZBTB17    | GC |
| LHX3      | GC | FGFR1OP | GC | SLC12A4   | GC |
| ANK1      | GC | IRF2BP2 | GC | GTPBP1    | GC |
| L1CAM     | GC | OMP     | GC | COP1      | GC |
| G6PD      | GC | KCNK18  | GC | PKN3      | GC |
| PTCH1     | GC | FXYD6   | GC | MIR1908   | GC |
| MC1R      | GC | RHCE    | GC | HSPA14    | GC |
| PITX3     | GC | ZNF750  | GC | TFPT      | GC |
| GARS1     | GC | CHL1    | GC | ZKSCAN8   | GC |
| KDM5B     | GC | MARK3   | GC | ZNF446    | GC |
| ADCYAP1   | GC | ADGRV1  | GC | UGT2B7    | GC |
| TNFSF11   | GC | ACD     | GC | TMEM115   | GC |
| SLC52A2   | GC | SLC5A6  | GC | KCNS2     | GC |
| LRP5      | GC | ETAA1   | GC | ZFP3      | GC |
| EDN3      | GC | ZNF385D | GC | ZNF133    | GC |
| FGA       | GC | BUD23   | GC | UBR2      | GC |
| C12orf4   | GC | MLEC    | GC | PARD3B    | GC |
| TBR1      | GC | SNIP1   | GC | NCAM2     | GC |
| AIRE      | GC | CHGB    | GC | PPP1R12B  | GC |
| GCG       | GC | PLXNA2  | GC | CD99      | GC |
| PEX5      | GC | EPX     | GC | FOXO6     | GC |
| CALCA     | GC | POU3F2  | GC | HIVEP3    | GC |
| MIR17     | GC | PRDM9   | GC | ZNF662    | GC |
| CCR5      | GC | NCOA7   | GC | LTC4S     | GC |
| GAL       | GC | PRSS1   | GC | VTA1      | GC |
| TNFRSF13B | GC | CASP2   | GC | PCDH7     | GC |
| ARNT2     | GC | GRB2    | GC | LGSN      | GC |

|          |    |            |    |          |    |
|----------|----|------------|----|----------|----|
| USP8     | GC | MBS2       | GC | DVL1P1   | GC |
| PER1     | GC | MBS3       | GC | CEP350   | GC |
| GATA1    | GC | ATOD1      | GC | SPATA8   | GC |
| PAX8     | GC | ATOD3      | GC | FMOD     | GC |
| BTBD9    | GC | ATOD5      | GC | IK       | GC |
| FIG4     | GC | ATOD6      | GC | ABCF1    | GC |
| EPG5     | GC | DUP7Q11.23 | GC | FLRT2    | GC |
| PROC     | GC | ATOD7      | GC | ENPP6    | GC |
| ATP2B3   | GC | ATOD8      | GC | KNTC1    | GC |
| ELANE    | GC | ATOD9      | GC | ANKMY1   | GC |
| TREX1    | GC | WAPL       | GC | FTCDNL1  | GC |
| EIF4E    | GC | ATP2C2     | GC | SERPINA4 | GC |
| COL13A1  | GC | SRGAP3     | GC | KDM3B    | GC |
| IPW      | GC | BTNL2      | GC | SPRED2   | GC |
| TBX5     | GC | MIAT       | GC | NR1D2    | GC |
| EGFR     | GC | MIR195     | GC | EDN2     | GC |
| ASS1     | GC | CD55       | GC | AGBL2    | GC |
| PLCB4    | GC | VPS26A     | GC | INKA1    | GC |
| FBXL3    | GC | ZDHHC8     | GC | TENT4A   | GC |
| IRS1     | GC | FGGY       | GC | AZIN2    | GC |
| CD28     | GC | PAGR1      | GC | SVEP1    | GC |
| DNAAF4   | GC | SLC41A1    | GC | ZPR1     | GC |
| ZFYVE26  | GC | FCSK       | GC | SLCO3A1  | GC |
| ACTA1    | GC | SLC5A2     | GC | FAM107B  | GC |
| NSDHL    | GC | AHR        | GC | MATK     | GC |
| GAA      | GC | CFHR2      | GC | SRL      | GC |
| EFHC1    | GC | SLITRK5    | GC | FABP5    | GC |
| COASY    | GC | IFNAR1     | GC | EPB41L3  | GC |
| ERBB4    | GC | SEMA3C     | GC | COL28A1  | GC |
| C4A      | GC | KRT8       | GC | ARHGEF3  | GC |
| GRIA1    | GC | KCNQ1-AS1  | GC | STAC     | GC |
| PDE4D    | GC | COL4A2     | GC | PZP      | GC |
| ELP4     | GC | DNAJC12    | GC | HAS2     | GC |
| MMD      | GC | HS1BP3     | GC | ZFP36    | GC |
| SCN10A   | GC | SCN7A      | GC | SLC24A3  | GC |
| SETBP1   | GC | LIN7B      | GC | ABLIM1   | GC |
| ATP6V0A2 | GC | ANLN       | GC | RGS7     | GC |
| GDI1     | GC | ARID2      | GC | HUS1     | GC |
| PRKAR1A  | GC | UTS2       | GC | KSR2     | GC |
| AIFM1    | GC | USH1C      | GC | PDF      | GC |
| SPART    | GC | SEPTIN4    | GC | NICN1    | GC |
| KCNB1    | GC | HEY2       | GC | ZNF292   | GC |
| IGF1R    | GC | SRXN1      | GC | SRSF10   | GC |
| NLRP3    | GC | ACER3      | GC | AK1      | GC |

|            |    |          |    |                     |    |
|------------|----|----------|----|---------------------|----|
| GLI3       | GC | KMO      | GC | USP4                | GC |
| PTPRC      | GC | IMPACT   | GC | UBAP2L              | GC |
| DNAJC5     | GC | HNRNPH1  | GC | HSPD1P15            | GC |
| KCNMA1     | GC | IFT20    | GC | ANKAR               | GC |
| TET2       | GC | KCNIP2   | GC | HCG18               | GC |
| GABRR3     | GC | SSTR1    | GC | RIF1                | GC |
| NDE1       | GC | CCT3     | GC | PLA2G2D             | GC |
| TCOF1      | GC | MMP12    | GC | CYP2J2              | GC |
| POMGNT1    | GC | CCL27    | GC | NMUR1               | GC |
| SETX       | GC | SERPING1 | GC | SYT6                | GC |
| UBE2L3     | GC | ADK      | GC | AMOTL2              | GC |
| GLRA1      | GC | EPHA3    | GC | TICRR               | GC |
| CSTB       | GC | CELF2    | GC | ANXA6               | GC |
| DKK1       | GC | H3C14    | GC | ACACB               | GC |
| KCNE1      | GC | CLPS     | GC | MON1A               | GC |
| EDNRA      | GC | ALKBH8   | GC | GLB1L3              | GC |
| INSR       | GC | NR1I3    | GC | H3-3B               | GC |
| SH3TC2     | GC | CIDEC    | GC | TLN1                | GC |
| TIMM8A     | GC | NAMPT    | GC | PRM1                | GC |
| KITLG      | GC | CYP46A1  | GC | ACTBL2              | GC |
| USP9X      | GC | ACVR1    | GC | ACTG1P22            | GC |
| SNTA1      | GC | C1orf210 | GC | ENSG000002269<br>65 | GC |
| WASF1      | GC | ZIC1     | GC | FECHP1              | GC |
| MYC        | GC | GMDS     | GC | ROMO1               | GC |
| KIAA0319   | GC | MIR23A   | GC | ENSG000002498<br>81 | GC |
| TSHB       | GC | GPM6B    | GC | PBX2P1              | GC |
| HUWE1      | GC | SPRN     | GC | MIR2113             | GC |
| MAP1B      | GC | POLI     | GC | ENSG000002570<br>60 | GC |
| SPTBN2     | GC | SHTN1    | GC | ENSG000002622<br>67 | GC |
| FGF23      | GC | TLX2     | GC | MRPL35              | GC |
| HIF1A      | GC | CLNK     | GC | MTERF1              | GC |
| IL12RB1    | GC | RNF168   | GC | NFAT5               | GC |
| TENM4      | GC | PSPN     | GC | MSRB2               | GC |
| SNORD116-1 | GC | GJC1     | GC | CPNE8               | GC |
| DNMT3B     | GC | DISP1    | GC | GPX6                | GC |
| TFAM       | GC | SELENBP1 | GC | SHISA4              | GC |
| PVALB      | GC | FMN1     | GC | ATP6V0B             | GC |
| GNB5       | GC | SDC1     | GC | MIR3681HG           | GC |
| FAR1       | GC | FBXL13   | GC | CELA1               | GC |
| MIR126     | GC | SPI1     | GC | SUPT3H              | GC |

|          |    |           |    |                     |    |
|----------|----|-----------|----|---------------------|----|
| ABCC8    | GC | ITGB1     | GC | KCTD16              | GC |
| HOXA1    | GC | HSPB7     | GC | AGMO                | GC |
| KCNE2    | GC | TRAP1     | GC | SLC7A4              | GC |
| CEP57    | GC | AHSG      | GC | IRF2                | GC |
| TIMELESS | GC | FGF20     | GC | RAD18               | GC |
| MIR140   | GC | BAK1      | GC | KLHL29              | GC |
| CD2AP    | GC | HOXB5     | GC | MVB12B              | GC |
| ALG1     | GC | LRRC43    | GC | IGSF9B              | GC |
| MYH11    | GC | MCM6      | GC | SLC22A8             | GC |
| SHBG     | GC | HHEX      | GC | SMYD3               | GC |
| RHO      | GC | VAR52     | GC | C15orf32            | GC |
| JRK      | GC | MYO1D     | GC | ADAMTS19            | GC |
| LTBP3    | GC | SLC27A5   | GC | BAG6                | GC |
| LEPQTL1  | GC | SNHG1     | GC | SMAD5               | GC |
| FLT1     | GC | LINC01554 | GC | STIM2               | GC |
| PRKAG2   | GC | MIR122    | GC | GJB5                | GC |
| LHX4     | GC | NEDD9     | GC | ROR1                | GC |
| CSF1R    | GC | CD68      | GC | PAK5                | GC |
| IGLON5   | GC | CTBP1     | GC | SRRM4               | GC |
| TSPAN7   | GC | MTF1      | GC | LOC101927284        | GC |
| STAR     | GC | PLEKHB1   | GC | TMC2                | GC |
| IGFBP1   | GC | NEFM      | GC | IGKV2D-29           | GC |
| CDC42    | GC | PTRHD1    | GC | MIR664A             | GC |
| IL1RAPL1 | GC | ANGPTL8   | GC | CWF19L2             | GC |
| OGDH     | GC | MIR154    | GC | PLEKHG1             | GC |
| CLIP2    | GC | EN1       | GC | STXBP4              | GC |
| RS1      | GC | HNRNPDL   | GC | FAM216A             | GC |
| NR0B1    | GC | ACE2      | GC | MIR99AHG            | GC |
| GTF2I    | GC | AP4E1     | GC | H1-5                | GC |
| PLCB1    | GC | AGFG1     | GC | AHNAK               | GC |
| ITPR1    | GC | DDB1      | GC | ASGR2               | GC |
| SCP2     | GC | PTK2B     | GC | ACTR3               | GC |
| GJC2     | GC | SBF1      | GC | GAS2                | GC |
| CNBP     | GC | CAMKK2    | GC | ENAH                | GC |
| DNM2     | GC | PWAR5     | GC | CCDC91              | GC |
| ADAM10   | GC | INPP5B    | GC | KCNIP4              | GC |
| CAMK2A   | GC | MIR33A    | GC | HCG4                | GC |
| TGFB2    | GC | CMYA5     | GC | HLA-K               | GC |
| CHRND    | GC | GRB10     | GC | MICD                | GC |
| CTSA     | GC | CXorf56   | GC | UFL1-AS1            | GC |
| SHOX     | GC | TFG       | GC | DDR1-DT             | GC |
| FXYD1    | GC | ALAS1     | GC | ENSG000002718<br>60 | GC |
| JPH3     | GC | NEDD8     | GC | RF00017-5399        | GC |

|          |    |         |    |                 |    |
|----------|----|---------|----|-----------------|----|
| CCL11    | GC | TAOK2   | GC | CARS1P2         | GC |
| BMP6     | GC | SLITRK2 | GC | ENSG00000226066 | GC |
| MYOD1    | GC | PPM1G   | GC | SLC8A1-AS1      | GC |
| DCAF17   | GC | CYBRD1  | GC | FSTL1           | GC |
| XDH      | GC | PML     | GC | AK8             | GC |
| CPOX     | GC | MBS1    | GC | METTLL15        | GC |
| ANXA5    | GC | MLN     | GC | APBA3           | GC |
| AIP      | GC | ITGAE   | GC | ORC5            | GC |
| TGFBR1   | GC | DIO3    | GC | DAZL            | GC |
| GK       | GC | BDKRB2  | GC | ECE2            | GC |
| TLR5     | GC | GAK     | GC | MRGPRX2         | GC |
| PODXL    | GC | UBE2E3  | GC | TVP23B          | GC |
| CACNA1G  | GC | NR1H3   | GC | INCA1           | GC |
| GATM     | GC | KIF14   | GC | COL23A1         | GC |
| ABCB1    | GC | CDK4    | GC | RASGEF1B        | GC |
| DCX      | GC | MSH3    | GC | GPC5            | GC |
| ADRB3    | GC | PLA2G1B | GC | UBXN1           | GC |
| TNIK     | GC | SIAH1   | GC | CDH20           | GC |
| AGRP     | GC | TERF1   | GC | ENSG00000224836 | GC |
| STX1B    | GC | KRT7    | GC | CFAP54          | GC |
| CC2D1A   | GC | CENPB   | GC | COX11           | GC |
| SLC52A3  | GC | MIP     | GC | CD3E            | GC |
| FLNC     | GC | PKD1L1  | GC | ISG20           | GC |
| MIR125A  | GC | MIR27B  | GC | PCAT1           | GC |
| NRTN     | GC | HPR     | GC | AOAH            | GC |
| LBR      | GC | GABRR1  | GC | LIPF            | GC |
| SLC29A3  | GC | CITED2  | GC | WDR37           | GC |
| DSP      | GC | GIGYF1  | GC | LINC02210-CRHR1 | GC |
| STX1A    | GC | MMP7    | GC | CSAD            | GC |
| ALDH18A1 | GC | FKBP1A  | GC | CSKMT           | GC |
| MIR223   | GC | FHIT    | GC | HYAL3           | GC |
| NDST1    | GC | CD1A    | GC | RNASE1          | GC |
| PABPN1   | GC | PMP2    | GC | OLFM2           | GC |
| LIMK1    | GC | CASC16  | GC | PRC1            | GC |
| NOD2     | GC | AZF1    | GC | SULF1           | GC |
| GHRH     | GC | GH-LCR  | GC | DCDC2C          | GC |
| HK1      | GC | CBLN1   | GC | RPS26P52        | GC |
| SLC9A9   | GC | HM13    | GC | ENSG00000237742 | GC |
| GALC     | GC | PCOS1   | GC | LINC02238       | GC |

|              |    |         |    |                 |    |
|--------------|----|---------|----|-----------------|----|
| PPP2CA       | GC | GRD2    | GC | ENSG00000233005 | GC |
| SLC6A9       | GC | ROBO4   | GC | ENSG00000286973 | GC |
| NTS          | GC | NARF    | GC | MBOAT2          | GC |
| ADRA2A       | GC | MBD1    | GC | FOXB1           | GC |
| SLC6A19      | GC | BRD1    | GC | MTMR6           | GC |
| SAG          | GC | MSMO1   | GC | CXDUPQ26.3      | GC |
| PGAP1        | GC | SLC4A4  | GC | MYO1B           | GC |
| P4HTM        | GC | ST7     | GC | PHACTR2         | GC |
| CDH1         | GC | PLEKHM2 | GC | SQOR            | GC |
| ABCC9        | GC | TAF1L   | GC | TSBP1           | GC |
| IL18         | GC | SYT12   | GC | EIF3A           | GC |
| MIR155       | GC | AMBP    | GC | GPAM            | GC |
| ADA          | GC | NCKAP1  | GC | PTGER3          | GC |
| MKRN3-AS1    | GC | PTGDR   | GC | PABPC1L         | GC |
| PDGFRA       | GC | SUMO2   | GC | TRUB2           | GC |
| ATL1         | GC | ATOH1   | GC | SNAPIN          | GC |
| KIF5A        | GC | F2RL1   | GC | LRTM1           | GC |
| TNNI3        | GC | NEURL4  | GC | SHISA6          | GC |
| SETD2        | GC | PPY     | GC | HYAL2           | GC |
| LHCGR        | GC | HMOX2   | GC | RNY5            | GC |
| GPR101       | GC | DUSP1   | GC | DGKB            | GC |
| RNU4ATAC     | GC | DNTT    | GC | AEBP2           | GC |
| IKBKG        | GC | CAV2    | GC | HS3ST4          | GC |
| KDM4C        | GC | IFNL3   | GC | POU2F1          | GC |
| CYP27B1      | GC | GNGT2   | GC | PHTF1           | GC |
| TDO2         | GC | FOXD4   | GC | KLHDC10         | GC |
| ALPL         | GC | GSK3A   | GC | INTS5           | GC |
| PICK1        | GC | CGB7    | GC | ZSCAN31         | GC |
| LOC108684022 | GC | NNMT    | GC | NKAIN2          | GC |
| ADCY5        | GC | UBE2K   | GC | CUL9            | GC |
| PWAR1        | GC | TAAR6   | GC | BET1            | GC |
| HP           | GC | EHD4    | GC | NXF1            | GC |
| SHOC2        | GC | ATP1A4  | GC | TOMM22          | GC |
| RBP4         | GC | QRSL1   | GC | SEMA3F-AS1      | GC |
| ACTA2        | GC | PLAUR   | GC | TMED9           | GC |
| RBM12        | GC | RECQL5  | GC | TTLL7           | GC |
| APTX         | GC | DIO2    | GC | CDNF            | GC |
| CD19         | GC | SSTR2   | GC | AOPEP           | GC |
| MYBPC3       | GC | PRDX5   | GC | KIF6            | GC |
| DUOX2        | GC | HSPBP1  | GC | LOC111365141    | GC |
| EZH2         | GC | EVX1    | GC | TRIM24          | GC |

|          |    |           |    |                 |    |
|----------|----|-----------|----|-----------------|----|
| RTN4R    | GC | ADAM22    | GC | SLC27A6         | GC |
| CISD2    | GC | DUPXQ25   | GC | TNFSF14         | GC |
| MLXIPL   | GC | NGEF      | GC | C1QTNF4         | GC |
| B3GALNT2 | GC | CDH9      | GC | ZBED9           | GC |
| RPL10    | GC | ANPEP     | GC | HLA-L           | GC |
| DCDC2    | GC | APAF1     | GC | KDM4A-AS1       | GC |
| GRM7     | GC | INSIG2    | GC | HCG21           | GC |
| PIGQ     | GC | PPP3CC    | GC | LINC01876       | GC |
| MIR146A  | GC | DCTN2     | GC | MIR5579         | GC |
| EZR      | GC | PDC       | GC | LINC01985       | GC |
| SLC40A1  | GC | MTDH      | GC | RPL21P17        | GC |
| NEU1     | GC | GABRQ     | GC | ENSG00000253844 | GC |
| SLC45A1  | GC | MFHAS1    | GC | ENSG00000284989 | GC |
| CEP152   | GC | SH3KBP1   | GC | ENSG00000259223 | GC |
| ATAD1    | GC | ANKRD31   | GC | RN7SKP120       | GC |
| CHRM2    | GC | IGBP1     | GC | ENSG00000270896 | GC |
| MT-ND2   | GC | LZTS1     | GC | lnc-DDR1-4      | GC |
| NR1H4    | GC | POTEF     | GC | ENSG00000212168 | GC |
| F3       | GC | LINC01546 | GC | RF00017-5404    | GC |
| PLEC     | GC | RNU1-1    | GC | ENSG00000287318 | GC |
| MT-TF    | GC | PTPRD-AS2 | GC | ANKRD12         | GC |
| WARS2    | GC | PRKX-AS1  | GC | ARL15           | GC |
| TGM1     | GC | CD2       | GC | PALM2AKAP2      | GC |
| SMAD3    | GC | ABO       | GC | SCGN            | GC |
| LMOD3    | GC | UBE3C     | GC | FOXL1           | GC |
| MITF     | GC | TSNAX     | GC | YTHDC1          | GC |
| NRCLP3   | GC | RAB29     | GC | IL20RB          | GC |
| ACADV1   | GC | PTTG1     | GC | PGLS            | GC |
| IMPA1    | GC | WASHC3    | GC | PMEPA1          | GC |
| RTTN     | GC | GSTO2     | GC | ARMC1           | GC |
| TMEM106B | GC | CCR4      | GC | TOMM34          | GC |
| ZMPSTE24 | GC | PRPF40A   | GC | ZSCAN12         | GC |
| HEPACAM  | GC | RP1L1     | GC | RALYL           | GC |
| PQBP1    | GC | EIF2AK2   | GC | EPSTI1          | GC |
| COL7A1   | GC | C4B_2     | GC | SGSM1           | GC |
| SDHA     | GC | TNFSF13   | GC | SPOCK3          | GC |
| GTF2IRD1 | GC | CMA1      | GC | SH3GL2          | GC |
| SZT2     | GC | ANKRD49   | GC | ITGBL1          | GC |



|         |            |             |    |           |    |
|---------|------------|-------------|----|-----------|----|
| KIF1B   | GC         | PCDHA3      | GC | GTF2A1    | GC |
| MIR144  | GC         | PRKDC       | GC | AKAP1     | GC |
| DSPS    | GC<br>OMIM | CHRNA3      | GC | ERAS      | GC |
| SMN1    | GC         | MIR98       | GC | RNPEP     | GC |
| PMPCA   | GC         | TXNDC9      | GC | MTCH2     | GC |
| NEUROD2 | GC         | EFHC2       | GC | ZKSCAN4   | GC |
| BGLAP   | GC         | HARS1       | GC | ZSCAN9    | GC |
| MIR106B | GC         | HMGB1       | GC | NOX5      | GC |
| MTM1    | GC         | FZD3        | GC | PSME4     | GC |
| PACS1   | GC         | TEKT3       | GC | SLC9A2    | GC |
| BAZ1B   | GC         | PVR         | GC | GRK6      | GC |
| MIF     | GC         | UBE2E2      | GC | FBXL7     | GC |
| KCNJ5   | GC         | ASIC1       | GC | SLC9A3R2  | GC |
| PNPLA6  | GC         | GPX3        | GC | MAPKAP1   | GC |
| ALOX5   | GC         | S100A9      | GC | PPP1R13L  | GC |
| CXCR4   | GC         | SOGA3       | GC | LINC01500 | GC |
| CYP1A2  | GC         | OTUD7A      | GC | ADAM24P   | GC |
| CFH     | GC         | PTPRJ       | GC | SLC22A23  | GC |
| CIT     | GC         | MIR497      | GC | OCEL1     | GC |
| ANO3    | GC         | HHC2:066650 | GC | TRAM2     | GC |
| NPAP1   | GC         | HCNR606     | GC | CCDC13    | GC |
| COL5A2  | GC         | HCNR617     | GC | EPHA5     | GC |
| KCNJ8   | GC         | MAP3K11     | GC | MAGI3     | GC |
| MAPK10  | GC         | HTR1F       | GC | TCF21     | GC |
| HJV     | GC         | CTCFL       | GC | GTF2E1    | GC |
| ITGAM   | GC         | HBE1        | GC | SUCLG2    | GC |
| CSF3R   | GC         | MIR219A2    | GC | FAM189A1  | GC |
| TOP3A   | GC         | MAS1L       | GC | DDX52     | GC |
| BCHE    | GC         | RICTOR      | GC | SEPTIN7P2 | GC |
| VLDLR   | GC         | SNX2        | GC | EEF1A1P14 | GC |
| NRCLP2  | GC         | TTBK1       | GC | NAT1      | GC |
| OPTN    | GC         | AQP3        | GC | CDK5RAP1  | GC |
| ACAN    | GC         | DDI1        | GC | NBPF22P   | GC |
| HEXA    | GC         | CSH1        | GC | LRRC1     | GC |
| IL1A    | GC         | IL6ST       | GC | PLD2      | GC |
| PRKRA   | GC         | GPR55       | GC | LGALS2    | GC |
| MYT1L   | GC         | SNX6        | GC | ST13P1    | GC |
| HSPA1A  | GC         | SNX5        | GC | DLG5      | GC |
| SKI     | GC         | KCNIP1      | GC | SCAND1    | GC |
| CPLX1   | GC         | SP2         | GC | ADGRB3    | GC |
| IRF5    | GC         | RCC1L       | GC | SART1     | GC |
| TRPA1   | GC         | ANGPT1      | GC | TMOD1     | GC |
| HNRNPA1 | GC         | HAR1A       | GC | CRACR2B   | GC |

|         |    |                 |    |           |    |
|---------|----|-----------------|----|-----------|----|
| UBQLN2  | GC | AQP5            | GC | LOC284395 | GC |
| FBLN5   | GC | EPM2AIP1        | GC | TSPAN18   | GC |
| PRPH2   | GC | CHST12          | GC | IP6K1     | GC |
| BCR     | GC | GTSCR1          | GC | MED8      | GC |
| HTR1D   | GC | GLIS1           | GC | C2orf69   | GC |
| LINS1   | GC | GLRA3           | GC | LINC01135 | GC |
| TBL2    | GC | TNKS            | GC | PTGIR     | GC |
| GBE1    | GC | SLC30A4         | GC | WDR59     | GC |
| EMD     | GC | LAMA5           | GC | WDFY1     | GC |
| WAC     | GC | NIPAL1          | GC | LRCH3     | GC |
| DLG4    | GC | DEXI            | GC | GFRA4     | GC |
| NRCLP4  | GC | SNORD112        | GC | RBBP6     | GC |
| NRCLP5  | GC | ENSG00000271486 | GC | EEF1G     | GC |
| NRCLP6  | GC | TBC1D5          | GC | ELMOD1    | GC |
| GCK     | GC | TBCD            | GC | NAA80     | GC |
| GAPDH   | GC | IDE             | GC | CDRT7     | GC |
| PRPH    | GC | CXCR2           | GC | OBI1-AS1  | GC |
| GRID2   | GC | CDCP2           | GC | PAXIP1    | GC |
| ABCA7   | GC | EGR3            | GC | PREX1     | GC |
| CNGB3   | GC | H4C1            | GC | MAEA      | GC |
| MT-TH   | GC | OLIG3           | GC | ADAMTS20  | GC |
| IGHMBP2 | GC | HAR1B           | GC | BAG1      | GC |
| CCR6    | GC | HPS1            | GC | HYI       | GC |
| FSHR    | GC | MIR382          | GC | RIC8B     | GC |
| BICD2   | GC | TOM1L2          | GC | IFITM4P   | GC |
| APOL1   | GC | MST1R           | GC | DENND3    | GC |
| SCARB2  | GC | ID1             | GC | GNB2      | GC |
| ADAR    | GC | MAP3K13         | GC | HECW1     | GC |
| CASP3   | GC | PCA3            | GC | GGT7      | GC |
| MBP     | GC | TUT1            | GC | FHOD3     | GC |
| RFC2    | GC | SULT1A3         | GC | FSIP1     | GC |
| IGF2R   | GC | MIR379          | GC | FNBP4     | GC |
| ARVCF   | GC | CD163           | GC | IPMK      | GC |
| DLK1    | GC | SMAD1           | GC | CCDC69    | GC |
| MED23   | GC | RHEB            | GC | SLIT1     | GC |
| CTNNA3  | GC | MAP11           | GC | FICD      | GC |
| GP6     | GC | SMARCA5         | GC | KIRREL1   | GC |
| TBXA2R  | GC | NSMF            | GC | PEAK1     | GC |
| ATPAF2  | GC | CXCL11          | GC | RASGEF1A  | GC |
| KCNA4   | GC | GRAP2           | GC | TLX1      | GC |
| IL12A   | GC | MBNL2           | GC | DEFA1     | GC |
| PC      | GC | SLC11A1         | GC | DHX57     | GC |
| AVPR2   | GC | ARHGAP39        | GC | MIA3      | GC |

|          |    |          |    |                 |    |
|----------|----|----------|----|-----------------|----|
| TRIB2    | GC | TGFA     | GC | ORC3            | GC |
| ACP5     | GC | SRSF1    | GC | JDP2            | GC |
| TREM2    | GC | ANKRD50  | GC | ANKS1A          | GC |
| GLUD2    | GC | DGKQ     | GC | USP34           | GC |
| MEFV     | GC | MFAP4    | GC | S100A2          | GC |
| TBK1     | GC | MED9     | GC | CTDSP2          | GC |
| SEPSECS  | GC | GID4     | GC | NPNT            | GC |
| MET      | GC | LRRTM3   | GC | UBOX5           | GC |
| ADGRG1   | GC | CHKA     | GC | SRSF12          | GC |
| CRPPA    | GC | ADD1     | GC | LINC01556       | GC |
| PSMB8    | GC | DSC3     | GC | STK4-AS1        | GC |
| TFR2     | GC | MAP6     | GC | LINC00240       | GC |
| SIM1     | GC | CCL7     | GC | VAV3-AS1        | GC |
| NIPAL4   | GC | MFF      | GC | SLC9A9-AS1      | GC |
| CRBN     | GC | HIP1     | GC | MIR4301         | GC |
| HLCS     | GC | CPB2     | GC | LINC01581       | GC |
| ASAH1    | GC | BRD2     | GC | MICE            | GC |
| GLDC     | GC | DBX1     | GC | GRM7-AS2        | GC |
| SERPINF2 | GC | NFIL3    | GC | LINC01776       | GC |
| WVOX     | GC | AMD1     | GC | RPL23AP1        | GC |
| JMJD1C   | GC | HR       | GC | GNPATP          | GC |
| DARS2    | GC | DSTYK    | GC | ZNF603P         | GC |
| DDOST    | GC | TRIM27   | GC | LOC101928475    | GC |
| PRDM10   | GC | CHRM5    | GC | ENSG00000229533 | GC |
| DCN      | GC | PTPRG    | GC | ENSG00000124593 | GC |
| TRDN     | GC | RIBC1    | GC | ENSG00000253238 | GC |
| PRF1     | GC | SRM      | GC | ENSG00000248973 | GC |
| ITGA2    | GC | SH3GL1   | GC | ENSG00000254035 | GC |
| KAT6A    | GC | GPR4     | GC | KRT8P18         | GC |
| DAG1     | GC | CASC15   | GC | ENSG00000261758 | GC |
| ZBTB20   | GC | MIR137HG | GC | LINC02450       | GC |
| CACNG2   | GC | CDC20    | GC | RPS7P8          | GC |
| NDUFV1   | GC | SLC22A3  | GC | ENSG00000243276 | GC |
| POLR3A   | GC | STAT5B   | GC | FXNP1           | GC |
| TUBB3    | GC | GREM1    | GC | RNA5SP181       | GC |
| HADHB    | GC | SNORD107 | GC | EBLN3P          | GC |

|          |        |        |    |                 |    |
|----------|--------|--------|----|-----------------|----|
| HBA2     | GC     | DERL1  | GC | ENSG00000223774 | GC |
| PTHLH    | GC     | MED13  | GC | ENSG00000223838 | GC |
| ERCC8    | GC     | ID4    | GC | ACTBP13         | GC |
| MCTP2    | GC     | MCEE   | GC | ENSG00000248538 | GC |
| CHRNA1   | GC     | FBXW7  | GC | ENSG00000249429 | GC |
| CACNA1F  | GC     | POC1B  | GC | PTP4A1P4        | GC |
| CHD2     | GC     | GPI    | GC | ENSG00000253901 | GC |
| GSR      | GC     | GPR78  | GC | ENSG00000266460 | GC |
| C4B      | GC     | ZBTB33 | GC | ENSG00000286608 | GC |
| ALMS1    | GC     | ABCA13 | GC | piR-39858-250   | GC |
| ALDH3A2  | GC     | EIF4A1 | GC | LOC105377632    | GC |
| C12orf65 | GC     | LEF1   | GC | ENSG00000261310 | GC |
| TXNRD2   | GC     | PAWR   | GC | ENSG00000227766 | GC |
| SIGMAR1  | GC     | MEF2D  | GC | ENSG00000236837 | GC |
| SMN2     | GC     | ATP5PD | GC | lnc-VRK2-10     | GC |
| PPP2R2B  | GC     | CD58   | GC | lnc-FEN1-6      | GC |
| CLIP1    | GC     | UHMK1  | GC | ENSG00000287027 | GC |
| PRTN3    | GC     | LYRM1  | GC | lnc-RPGRIP1L-2  | GC |
| LIAS     | GC     | MIR182 | GC | ENSG00000280040 | GC |
| COG5     | GC     | NTSR1  | GC | piR-48749-002   | GC |
| TBL1XR1  | GC     | YBX1   | GC | RF00017-5528    | GC |
| CSMD1    | GC     | PCM1   | GC | ENSG00000271272 | GC |
| HSPB8    | GC     | FGF13  | GC | ENSG00000287634 | GC |
| GLE1     | GC     | ULK2   | GC | ENSG00000285409 | GC |
| PTH1R    | GC TTD | MYO16  | GC | LOC105377628    | GC |
| PDCD1    | GC     | TTI2   | GC | ENSG00000254780 | GC |
| NFIX     | GC     | PROCR  | GC | ENSG00000225842 | GC |

|           |        |            |    |                 |    |
|-----------|--------|------------|----|-----------------|----|
| SLC25A15  | GC     | RAMP1      | GC | ENSG00000270541 | GC |
| MCPH1     | GC     | MIR4422HG  | GC | ENSG00000275827 | GC |
| CSF3      | GC     | TMEM126A   | GC | OLFM1           | GC |
| KIF11     | GC     | CD9        | GC | SCAI            | GC |
| LARS2     | GC     | MTRNR2L5   | GC | SCGB1D4         | GC |
| MAP2      | GC     | NR2E1      | GC | CTDSPL          | GC |
| STUB1     | GC     | WDR11      | GC | IPO9            | GC |
| ABCB11    | GC     | MAP3K9     | GC | MRPS24          | GC |
| NFIB      | GC     | POF1B      | GC | NR2F6           | GC |
| VIP       | GC     | CHP1       | GC | SLC38A3         | GC |
| RAB11A    | GC     | SERPINE2   | GC | MPZL3           | GC |
| EYA1      | GC     | CERKL      | GC | SLC22A11        | GC |
| MT-CO3    | GC     | SNX1       | GC | PYROXD2         | GC |
| C1QBP     | GC     | KDM4A      | GC | KBTBD11         | GC |
| FDFT1     | GC     | MAP2K3     | GC | EIF4G3          | GC |
| ALAS2     | GC     | CLN9       | GC | MDFIC           | GC |
| FAAH      | GC     | ECT        | GC | UBXN11          | GC |
| GNPTAB    | GC     | DEL16P13.3 | GC | TRIM69          | GC |
| CLCN7     | GC     | S100A8     | GC | ZBTB46          | GC |
| PTGS2     | GC     | SP140      | GC | CCN4            | GC |
| MIR15A    | GC     | SYNGR1     | GC | HDAC7           | GC |
| FGF14     | GC     | MIR381     | GC | SESN1           | GC |
| NRXN3     | GC     | TNFRSF18   | GC | RIPOR2          | GC |
| KRT14     | GC     | ORC1       | GC | KLHL1           | GC |
| SCN3B     | GC     | ERC1       | GC | C1orf87         | GC |
| KMT2C     | GC     | FMO5       | GC | ALOX15B         | GC |
| HNRNPA2B1 | GC     | CXCR1      | GC | MMS19           | GC |
| TECPR2    | GC     | PGAM5      | GC | KCTD15          | GC |
| CAPN1     | GC     | RFX2       | GC | RADIL           | GC |
| AGL       | GC     | CASZ1      | GC | ZNF460          | GC |
| CD4       | GC     | MAGI2      | GC | LRRC18          | GC |
| ROBO3     | GC     | SPN        | GC | PIP5K1B         | GC |
| SLC4A1    | GC     | P2RX2      | GC | VPS35L          | GC |
| TACR3     | GC     | SLC30A6    | GC | ZC3H11A         | GC |
| OPA3      | GC     | RARRES2    | GC | CLTB            | GC |
| MED25     | GC     | GRIN3B     | GC | OTUD7B          | GC |
| CALM1     | GC     | C8orf37    | GC | SLC39A6         | GC |
| STT3A     | GC     | VILL       | GC | TMPRSS11D       | GC |
| TCAP      | GC     | KRT18      | GC | HIGD1A          | GC |
| FLG       | GC     | VPS29      | GC | RAB17           | GC |
| HTR7      | GC TTD | ZNF746     | GC | CDHR3           | GC |
| NEK1      | GC     | COBL       | GC | TGFBRAP1        | GC |

---

|          |    |             |    |              |    |
|----------|----|-------------|----|--------------|----|
| ABCD1    | GC | KCNN1       | GC | FAM218A      | GC |
| HIBCH    | GC | CD1D        | GC | KLK9         | GC |
| NOS1AP   | GC | PEG10       | GC | MBOAT1       | GC |
| WDR4     | GC | ARR3        | GC | CYB561D1     | GC |
| TRH      | GC | CTPS1       | GC | FARP1        | GC |
| HBA1     | GC | KCNJ16      | GC | ACSL1        | GC |
| NTF4     | GC | RAN         | GC | ILF3         | GC |
| COMP     | GC | CCT4        | GC | F11R         | GC |
| MATR3    | GC | MAFB        | GC | MAGEC2       | GC |
| CYP11B1  | GC | PAM         | GC | SLC9A4       | GC |
| FGF12    | GC | CRYZL1      | GC | ZNF641       | GC |
| SLC35A3  | GC | PCSK1N      | GC | ATF7IP2      | GC |
| CHCHD10  | GC | RSS         | GC | AMIGO3       | GC |
| KCND3    | GC | TRAPPC2B    | GC | SMAD5-AS1    | GC |
| PRSS12   | GC | ID3         | GC | LOC105372310 | GC |
| PKD1     | GC | SMCHD1      | GC | TM9SF2       | GC |
| APOH     | GC | ATP13A3     | GC | UMODL1       | GC |
| CYP2C19  | GC | SLC47A1     | GC | GLCCI1       | GC |
| ETFDH    | GC | SMCR2       | GC | TNIP2        | GC |
| SCN2B    | GC | SMCR6       | GC | EIF5A        | GC |
| GMPPB    | GC | HSD17B13    | GC | PRKCQ        | GC |
| RORB     | GC | TSNAX-DISC1 | GC | DISP3        | GC |
| HAND2    | GC | DIP2A       | GC | C1GALT1      | GC |
| IYD      | GC | GABARAPL1   | GC | AP1B1        | GC |
| EEF1A2   | GC | KLK4        | GC | MARF1        | GC |
| APOC3    | GC | IL1R2       | GC | PRELID1      | GC |
| ATP1A1   | GC | HAVCR1      | GC | DEFB128      | GC |
| MSN      | GC | SCLY        | GC | TMEM158      | GC |
| ASMT     | GC | GRP         | GC | LTBR         | GC |
| AKAP9    | GC | SRSF6       | GC | E2F3         | GC |
| TUBB2B   | GC | CD274       | GC | SETMAR       | GC |
| SMARCA4  | GC | MIR1185-1   | GC | GRXCR1       | GC |
| TCF7L2   | GC | WHAMM       | GC | RBM39        | GC |
| HSD11B1  | GC | LRRC41      | GC | CD93         | GC |
| GATAD2B  | GC | SRP68P1     | GC | ITM2C        | GC |
| GRIA2    | GC | MIR346      | GC | LEMD2        | GC |
| SLC22A5  | GC | SGPL1       | GC | HMBOX1       | GC |
| CUL3     | GC | RHBDF2      | GC | HNRNPD       | GC |
| GJA5     | GC | LINC01734   | GC | LUC7L3       | GC |
| TRAPPC6B | GC | CRELD1      | GC | DEDD         | GC |
| SH3BP2   | GC | CHN2        | GC | OLFM4        | GC |
| ADAMTS13 | GC | SSTR4       | GC | SYT17        | GC |
| EML1     | GC | AJAP1       | GC | DIRC1        | GC |
| DYM      | GC | LCA5        | GC | GNPDA1       | GC |

---

|          |    |              |    |           |    |
|----------|----|--------------|----|-----------|----|
| MEIS1    | GC | QKI          | GC | MYO3B     | GC |
| TSEN54   | GC | GPRIN1       | GC | ENY2      | GC |
| ALDH2    | GC | SCOC-AS1     | GC | JHY       | GC |
| TRHR     | GC | S100A6       | GC | GDF7      | GC |
| NOP56    | GC | ENTR1        | GC | PLCXD2    | GC |
| UROD     | GC | ITPR3        | GC | GALNT13   | GC |
| MIR483   | GC | GCFC2        | GC | SENP5     | GC |
| ZNF81    | GC | MIR675       | GC | KRCC1     | GC |
| MMP13    | GC | PLD1         | GC | PBX4      | GC |
| IHH      | GC | GPC6         | GC | TAS2R14   | GC |
| CRADD    | GC | VPS54        | GC | ARHGAP28  | GC |
| HMGCR    | GC | ADRA1B       | GC | MXD3      | GC |
| EPAS1    | GC | CCDC144A     | GC | LRP3      | GC |
| PRDM16   | GC | SOX11        | GC | MPHOSPH6  | GC |
| KCNK3    | GC | EIF4A2       | GC | CHST2     | GC |
| MYO7A    | GC | USP24        | GC | PDIA3     | GC |
| RTN4     | GC | SYT11        | GC | TMEM30B   | GC |
| CCL5     | GC | RANBP17      | GC | GPAT3     | GC |
| LIPN     | GC | RNF11        | GC | LINC00841 | GC |
| ACTG1    | GC | AURKA        | GC | CCRL2     | GC |
| NFE2L2   | GC | AADAC        | GC | NAP1L1    | GC |
| GHSR     | GC | H2BC21       | GC | SNORA13   | GC |
| CSNK2A1  | GC | MS4A2        | GC | RGS14     | GC |
| MAPK1    | GC | STRADB       | GC | LAYN      | GC |
| TRAK1    | GC | LMX1A        | GC | CCDC27    | GC |
| TGFB3    | GC | CCDC8        | GC | DEUP1     | GC |
| DUOXA2   | GC | MIR20B       | GC | ZNF217    | GC |
| BTK      | GC | USP40        | GC | ARHGEF10L | GC |
| SLC1A4   | GC | VPS26B       | GC | DDX17     | GC |
| PPARGC1A | GC | VAPA         | GC | DDN       | GC |
| MYLK     | GC | LNPEP        | GC | HTATIP2   | GC |
| GNRHR    | GC | APBB1        | GC | STAP2     | GC |
| MRAP     | GC | LOC106050103 | GC | GPR156    | GC |
| DNMT3A   | GC | RPSA         | GC | FGFBP1    | GC |
| SNX14    | GC | NT5E         | GC | CDK5R2    | GC |
| PPARG    | GC | GAS5         | GC | SEMA3B    | GC |
| RECQL4   | GC | AMT          | GC | BTBD3     | GC |
| TPM2     | GC | HOMER3       | GC | CREB3L2   | GC |
| SIL1     | GC | USP2         | GC | SUSD1     | GC |
| DDX41    | GC | LOC108663985 | GC | LIFR-AS1  | GC |
| INPP5E   | GC | PRKG2        | GC | PCF11     | GC |
| ASXL3    | GC | STK32B       | GC | GPR141    | GC |
| ADCY10   | GC | PIGK         | GC | GAB1      | GC |
| CYP3A4   | GC | GOLGA2       | GC | ZMYM4     | GC |

|         |            |              |    |              |    |
|---------|------------|--------------|----|--------------|----|
| TNPO3   | GC         | MST1         | GC | MX2          | GC |
| DICER1  | GC         | SKP1         | GC | PLD5         | GC |
| FGF2    | GC         | CDC34        | GC | GREB1        | GC |
| CILK1   | GC         | PSMA5        | GC | SAMD4A       | GC |
| CIZ1    | GC         | RPN2         | GC | HACD2        | GC |
| CBS     | GC         | CAVIN2       | GC | RAB3C        | GC |
| GNAI3   | GC         | CDKAL1       | GC | SEMA3F       | GC |
| SCNN1A  | GC         | GPR89B       | GC | PFN3         | GC |
| AGPAT2  | GC         | GPR89A       | GC | IPO5         | GC |
| AGTR2   | GC         | TRPM3        | GC | CNBD1        | GC |
| VAPB    | GC         | ATXN3L       | GC | PCDHGA3      | GC |
| SOD2    | GC         | REM1         | GC | SMYD1        | GC |
| RLS6    | GC         | CCDC62       | GC | RLN3         | GC |
| LITAF   | GC         | DPY19L2P2    | GC | ACKR4        | GC |
| MCCC1   | GC         | UCHL1-AS1    | GC | SNRNP48      | GC |
| ANKK1   | GC         | LINC01262    | GC | CD53         | GC |
| GHRHR   | GC         | UCH1LAS      | GC | NMNAT2       | GC |
| ENO2    | GC         | TRIP12       | GC | GPR83        | GC |
| SIK1    | GC         | KCNK2        | GC | CAND1        | GC |
| CYP2B6  | GC         | TTC8         | GC | RNF123       | GC |
| STT3B   | GC         | RNF13        | GC | PBX3         | GC |
| NLGN1   | GC         | PPP1R9B      | GC | ASCL4        | GC |
| MDD2    | GC<br>OMIM | MIR128-1     | GC | PABPC1P2     | GC |
| PEX14   | GC         | TRAF3IP2-AS1 | GC | BNIP2        | GC |
| CA2     | GC         | ADH1A        | GC | SRP14        | GC |
| SLC16A2 | GC         | FERD3L       | GC | MPP7         | GC |
| HCN4    | GC         | PAF1         | GC | SMARCD1      | GC |
| ENG     | GC         | GSTT1        | GC | NIPSNAP3B    | GC |
| GM2A    | GC         | BST1         | GC | BUB1B-PAK6   | GC |
| NADK2   | GC         | TBXAS1       | GC | UBL5         | GC |
| KCNJ1   | GC         | EIF4EBP2     | GC | MRPL1        | GC |
| NPTX2   | GC         | CRAT         | GC | GSTM4        | GC |
| KCNC1   | GC         | GLRA4        | GC | PHLPP1       | GC |
| ANOS1   | GC         | SWI5         | GC | LOC101928516 | GC |
| OPRK1   | GC         | STMN2        | GC | RALBP1       | GC |
| CD59    | GC         | HGF          | GC | INSC         | GC |
| PPP3CA  | GC         | PNLIP        | GC | GTF2B        | GC |
| HNRNPH2 | GC         | BACH2        | GC | ZNF536       | GC |
| WAS     | GC         | RNF170       | GC | PTENP1       | GC |
| EBP     | GC         | MIR92A1      | GC | ATP6V1C2     | GC |
| GLI2    | GC         | NSUN5        | GC | GPA33        | GC |
| EPOR    | GC         | ATP13A1      | GC | NSL1         | GC |
| PCGF2   | GC         | CDH17        | GC | CMC2         | GC |



---

|          |            |          |    |           |    |
|----------|------------|----------|----|-----------|----|
| MDD1     | GC<br>OMIM | ADCY2    | GC | TMEM150C  | GC |
| ARSH     | GC         | ESS2     | GC | LINC00996 | GC |
| CHCHD2   | GC         | HLA-DRB3 | GC | RBM6      | GC |
| PMS2     | GC         | SCG5     | GC | EVA1A     | GC |
| SELE     | GC         | PAPOLG   | GC | STYX      | GC |
| MC2R     | GC         | BRD4     | GC | CIAO2B    | GC |
| MIR9-1   | GC         | IQCK     | GC | DMC1      | GC |
| GNAS-AS1 | GC         | TBC1D20  | GC | CASP8AP2  | GC |
| SLC33A1  | GC         | DNAJB2   | GC | TMEM109   | GC |
| ALG14    | GC         | PPT2     | GC | SIGLEC1   | GC |
| SOS1     | GC         | H4C11    | GC | KDELR3    | GC |
| DYNC1I2  | GC         | CD209    | GC | UBN1      | GC |
| HIVEP2   | GC         | DEFB1    | GC | HELT      | GC |
| SPTLC1   | GC         | CHD5     | GC | ZNF500    | GC |
| PIGP     | GC         | KANTR    | GC | IPO9-AS1  | GC |
| CAPN3    | GC         | PLIN1    | GC | RGS12     | GC |
| MOCS1    | GC         | CNIH2    | GC | CSE1L     | GC |
| PGAP3    | GC         | SAMD11   | GC | MS4A3     | GC |
| LINGO1   | GC         | BHLHE40  | GC | SLC28A3   | GC |
| SLC12A1  | GC         | RBCK1    | GC | PKHD1L1   | GC |
| PICALM   | GC         | GNAT1    | GC | PHTF2     | GC |
| F13A1    | GC         | SCG2     | GC | ZBPB2     | GC |
| MMP1     | GC         | UBE4A    | GC | OR51F1    | GC |
| SNHG14   | GC         | GCLM     | GC | GLYR1     | GC |
| UMOD     | GC         | KCTD3    | GC | TMEM182   | GC |
| AIMP1    | GC         | GDF15    | GC | CDC37     | GC |
| ASH1L    | GC         | FUT2     | GC | AADA4L4   | GC |
| TPK1     | GC         | SV2C     | GC | PPP6R1    | GC |
| GRIK1    | GC         | LRRC7    | GC | ENOPH1    | GC |
| AIMP2    | GC         | PRR12    | GC | CDC16     | GC |
| ELP1     | GC         | LY86     | GC | RFC3      | GC |
| ERBB3    | GC         | CTTN     | GC | RSBN1     | GC |
| TPI1     | GC         | CUL7     | GC | LRRC59    | GC |
| SERPINA6 | GC         | COX4I1   | GC | CAMKV     | GC |
| AGA      | GC         | SRSF9    | GC | VGLL2     | GC |
| HLA-G    | GC         | TET3     | GC | CGRRF1    | GC |
| CR1      | GC         | AGO1     | GC | PTPN13    | GC |
| AMH      | GC         | ASIC3    | GC | HNRNPA0   | GC |
| CTSF     | GC         | UBE2V1   | GC | RTRAF     | GC |
| CALM2    | GC         | TFE3     | GC | JOSD1     | GC |
| SARS1    | GC         | CHD6     | GC | HOXD3     | GC |
| IFIH1    | GC         | FNDC3A   | GC | ARHGAP18  | GC |
| SULT2B1  | GC         | GPR153   | GC | KLHL5     | GC |

---

---

|         |    |            |    |            |    |
|---------|----|------------|----|------------|----|
| TRPS1   | GC | UBE2G2     | GC | SF3A3      | GC |
| MIR34C  | GC | MBD2       | GC | CPEB4      | GC |
| PDHA1   | GC | LAMB3      | GC | BCAS3      | GC |
| CYP27A1 | GC | GGCT       | GC | MOV10L1    | GC |
| ADAM17  | GC | GC         | GC | GPRC5B     | GC |
| COL11A2 | GC | SIX6       | GC | RFFL       | GC |
| NSD2    | GC | WIP1       | GC | STARD4-AS1 | GC |
| TRPV3   | GC | DENND11    | GC | TAF2       | GC |
| CCDC47  | GC | CALCB      | GC | CHKB-CPT1B | GC |
| TACO1   | GC | MIR193B    | GC | EPS8       | GC |
| MDH2    | GC | NUP160     | GC | PCDH18     | GC |
| STK11   | GC | TSPOAP1    | GC | GPSM3      | GC |
| SEPTIN9 | GC | FRAS1      | GC | CHCHD3     | GC |
| MIR148B | GC | TIRAP      | GC | TACC2      | GC |
| SEMA5A  | GC | TSPAN2     | GC | EEPD1      | GC |
| PEPD    | GC | LIPJ       | GC | CFAP299    | GC |
| NPSR1   | GC | HNRNPF     | GC | EEF1A1P22  | GC |
| GPC3    | GC | TCF4-AS1   | GC | TSKU       | GC |
| ATAD3A  | GC | RPTOR      | GC | OXNAD1     | GC |
| ADRA1A  | GC | SEZ6L      | GC | SPAG7      | GC |
| CYFIP2  | GC | STX17      | GC | RGS16      | GC |
| HTR3B   | GC | LRRN1      | GC | PSME3IP1   | GC |
| TUBA1A  | GC | LINC00271  | GC | H3-5       | GC |
| MAPK14  | GC | H4C12      | GC | C11orf97   | GC |
| RNASEL  | GC | TPTE       | GC | MTA2       | GC |
| KCNA5   | GC | ISG15      | GC | IDO2       | GC |
| OCA2    | GC | INHA       | GC | PLCB2      | GC |
| TRIO    | GC | KCNK6      | GC | PARP4      | GC |
| MYCN    | GC | CCR2       | GC | TANK       | GC |
| COL17A1 | GC | VAV3       | GC | EHF        | GC |
| ARCN1   | GC | DUP5P13    | GC | OR6C1      | GC |
| MAD1L1  | GC | DEL17P13.1 | GC | BCAP29     | GC |
| IBA57   | GC | BFIS1      | GC | OR10Z1     | GC |
| MAGT1   | GC | PRSS8      | GC | MIR3976HG  | GC |
| WDR62   | GC | LRRN3      | GC | SP140L     | GC |
| MYD88   | GC | CHD4       | GC | PSD4       | GC |
| HAPLN1  | GC | TNXA       | GC | PRPF4B     | GC |
| RAC2    | GC | MOV10      | GC | ARID4B     | GC |
| KCNK9   | GC | MIRLET7B   | GC | RNF169     | GC |
| WDR73   | GC | POU4F1     | GC | CTPS2      | GC |
| HSD3B2  | GC | GPHA2      | GC | CLASP1     | GC |
| IL7R    | GC | CCL20      | GC | GDPD4      | GC |
| JUP     | GC | THAP3      | GC | RAD1       | GC |
| POMT1   | GC | PDPK1      | GC | CEP72      | GC |

---

|           |    |              |    |                    |    |
|-----------|----|--------------|----|--------------------|----|
| OPRD1     | GC | POLE         | GC | ADGRB2             | GC |
| SIRT1     | GC | FGF18        | GC | DDX60L             | GC |
| PDE10A    | GC | HABP2        | GC | FHDC1              | GC |
| CTSK      | GC | CD1C         | GC | RIDA               | GC |
| BAP1      | GC | SPECC1L      | GC | IGSF11             | GC |
| FBP1      | GC | EXOC1        | GC | ATAD2B             | GC |
| ABCB4     | GC | GRHPR        | GC | ARPC2              | GC |
| NT5C2     | GC | LOC114803470 | GC | CPSF2              | GC |
| LRP4      | GC | RAB11FIP5    | GC | ZC3H4              | GC |
| MEG3      | GC | AGAP6        | GC | NIBAN1             | GC |
| TM4SF20   | GC | SUCO         | GC | PUM3               | GC |
| PLOD1     | GC | CCS          | GC | ECT2               | GC |
| TNFRSF10A | GC | NMUR2        | GC | RSBN1L             | GC |
| CUX2      | GC | MDGA2        | GC | GPR176             | GC |
| PPOX      | GC | RNF41        | GC | EMC7               | GC |
| SLC12A6   | GC | H4C9         | GC | FAM83B             | GC |
| CYP11B2   | GC | ETS1         | GC | RPRD2              | GC |
| SPIB      | GC | ANKS1B       | GC | RFC5               | GC |
| WDR45B    | GC | H4C3         | GC | NEK6               | GC |
| COG4      | GC | H4C8         | GC | USP6NL             | GC |
| ASXL1     | GC | H4C6         | GC | SCRN1              | GC |
| CNTF      | GC | FCGR1A       | GC | SFXN1              | GC |
| ACTB      | GC | KCNE4        | GC | UPP2               | GC |
| CRYAA     | GC | JARID2       | GC | LRFN2              | GC |
| CPLANE1   | GC | COCH         | GC | INTS12             | GC |
| PAX2      | GC | DNMT3L       | GC | C3orf67            | GC |
| UNC13A    | GC | H4C2         | GC | OPN3               | GC |
| MIR29A    | GC | H4C13        | GC | APOBEC3C           | GC |
| RRAS      | GC | H4C4         | GC | UNC79              | GC |
| PRICKLE1  | GC | H4C5         | GC | LMAN2              | GC |
| SLC13A5   | GC | CACNA1C-AS2  | GC | GFPT2              | GC |
| CUX1      | GC | PPP1R3F      | GC | STK17A             | GC |
| SELL      | GC | CSRP1        | GC | BDP1               | GC |
| NBAS      | GC | IPPK         | GC | RIMS4              | GC |
| BLOC1S1   | GC | TRAT1        | GC | CACTIN             | GC |
| COG1      | GC | PFAS         | GC | TMEM189-<br>UBE2V1 | GC |
| PLA2G4A   | GC | PPP1R13B     | GC | FLJ33534           | GC |
| WNT4      | GC | HPX          | GC | LOC401478          | GC |
| TNFRSF11A | GC | NCOA2        | GC | BUD13              | GC |
| AVPR1B    | GC | SUPT5H       | GC | USP28              | GC |
| MMEL1     | GC | PTGDR2       | GC | EFNA1              | GC |
| GPD1L     | GC | HPD          | GC | S100P              | GC |
| PLPBP     | GC | ESPL1        | GC | SS18               | GC |

---

|          |    |            |    |                |    |
|----------|----|------------|----|----------------|----|
| GYS1     | GC | TPT1       | GC | PLEKHG6        | GC |
| NTNG1    | GC | CERS1      | GC | AFAP1L1        | GC |
| LGI1     | GC | SHOX2      | GC | KDM8           | GC |
| FSHB     | GC | KLK7       | GC | TRIM67         | GC |
| TUBB4A   | GC | POLD1      | GC | UBTD1          | GC |
| TMEM43   | GC | NPRL3      | GC | C2CD4C         | GC |
| TBL1X    | GC | EDEM1      | GC | C14orf177      | GC |
| A2M      | GC | GOT2       | GC | LINC00917      | GC |
| RLS7     | GC | TEKT5      | GC | WDR11-AS1      | GC |
| IFT43    | GC | RNF217-AS1 | GC | XRRA1          | GC |
| CD79A    | GC | KLKB1      | GC | SNRK           | GC |
| ITGB2    | GC | GNB4       | GC | RASAL2         | GC |
| SNORD116 | GC | ESX1       | GC | LOC100129620   | GC |
| EPCAM    | GC | MIR652     | GC | GALNTL6        | GC |
| PI4KA    | GC | CDC14A     | GC | TAB1           | GC |
| CRX      | GC | FARP2      | GC | DEFB127        | GC |
| M6PR     | GC | PIK3CD     | GC | IZUMO1R        | GC |
| CASQ2    | GC | SNAI1      | GC | ENC1           | GC |
| CR2      | GC | HBEGF      | GC | VPS37C         | GC |
| SIX3     | GC | LTF        | GC | GPR26          | GC |
| NRGN     | GC | PIRC2      | GC | OR2J3          | GC |
| NFKB2    | GC | PIRC4      | GC | TANGO6         | GC |
| AMELX    | GC | MMAB       | GC | H2AC6          | GC |
| PSENN    | GC | UPK1A      | GC | RNF40          | GC |
| GAP43    | GC | THADA      | GC | EPC1           | GC |
| REST     | GC | KIR3DL1    | GC | C10orf90       | GC |
| TRIP13   | GC | CABIN1     | GC | PROKR1         | GC |
| HOXB1    | GC | TSNARE1    | GC | GBF1           | GC |
| P3H1     | GC | FZD9       | GC | LRP1B          | GC |
| NUP107   | GC | NFKBIL1    | GC | EPB41L4A       | GC |
| INF2     | GC | FMO2       | GC | TENM2          | GC |
| ARMC9    | GC | XIST       | GC | ZNF561         | GC |
| CHRNA9   | GC | PPP1R15A   | GC | SNTG1          | GC |
| SLC5A5   | GC | GJA3       | GC | BCL2L14        | GC |
| ATP12A   | GC | NOP2       | GC | NFE2L3         | GC |
| UNC80    | GC | LIF        | GC | VGLL3          | GC |
| DCPS     | GC | NLRP5      | GC | ATXN7L1        | GC |
| HCFC1    | GC | DNAH12     | GC | LRIF1          | GC |
| OCRL     | GC | VDAC3      | GC | CABCOC01       | GC |
| HTR2B    | GC | USF1       | GC | TPI1P2         | GC |
| FGD1     | GC | BCL2L1     | GC | RPL6P25        | GC |
| PLAT     | GC | NFATC1     | GC | EGID-100124696 | GC |
| HCCS     | GC | DEFB4A     | GC | CCDC162P       | GC |
| DSG2     | GC | APLN       | GC | GASK1A         | GC |

---

|          |    |               |    |           |    |
|----------|----|---------------|----|-----------|----|
| DBP      | GC | TLE1          | GC | STK32A    | GC |
| APPL1    | GC | NBPF3         | GC | GIN1      | GC |
| CPT1B    | GC | NMT1          | GC | RBM34     | GC |
| CTNND2   | GC | LDHA          | GC | JAML      | GC |
| CHM      | GC | NKX6-2        | GC | MIR4789   | GC |
| MTRR     | GC | SOBP          | GC | RGS20     | GC |
| STAT4    | GC | SNRPE         | GC | TAS2R1    | GC |
| TCN2     | GC | CD83          | GC | ZBED5     | GC |
| CALB1    | GC | EIF4H         | GC | FAM241B   | GC |
| CXCL10   | GC | MIR95         | GC | RHOBTB3   | GC |
| DLD      | GC | ZNRD1ASP      | GC | TMX2      | GC |
| TSC22D3  | GC | MIR432        | GC | ABHD14B   | GC |
| PGAP2    | GC | TIMM13        | GC | ZBED8     | GC |
| SERPINI1 | GC | FBLN2         | GC | SH3RF1    | GC |
| SMARCAL1 | GC | PPP3R1        | GC | RFTN1     | GC |
| SMARCC2  | GC | PDE4DIP       | GC | TRPC7     | GC |
| MAFD1    | GC | FMO4          | GC | ZNF691    | GC |
| MIR29C   | GC | COMA          | GC | RMDN2     | GC |
| RETREG1  | GC | SNX13         | GC | ZNF66     | GC |
| LARP7    | GC | NTM           | GC | OR2BH1P   | GC |
| NONO     | GC | KIFAP3        | GC | RAPGEF5   | GC |
| HSPA9    | GC | TRIM9         | GC | TRIM11    | GC |
| PYY      | GC | NFIC          | GC | PRLH      | GC |
| MIR24-1  | GC | NXPH1         | GC | PDXP      | GC |
| GPD1     | GC | NMBR          | GC | HLX       | GC |
| IL3      | GC | TXK           | GC | MAGEA9B   | GC |
| HSP90AA1 | GC | ABCC3         | GC | SLC2A12   | GC |
| THRA     | GC | DLAT          | GC | C1RL      | GC |
| UBA5     | GC | PTCHD1-AS     | GC | PCMTD1    | GC |
| SLC37A4  | GC | MIR369        | GC | GPATCH2   | GC |
| SLC10A2  | GC | KCNK10        | GC | ZNF562    | GC |
| ATP4A    | GC | RAI14         | GC | MB21D2    | GC |
| KMT2B    | GC | ALDH1B1       | GC | STEAP1B   | GC |
| EMX2     | GC | PRPS1L1       | GC | ARMH4     | GC |
| TMLHE    | GC | MIR181D       | GC | LINC01184 | GC |
| COL10A1  | GC | SYNPO         | GC | LINC01722 | GC |
| HDAC9    | GC | DCDC1         | GC | PA2G4P2   | GC |
| MIR30E   | GC | ICAM3         | GC | USE1      | GC |
| EIF2AK3  | GC | BAZ2B         | GC | PSD3      | GC |
| LRSAM1   | GC | C1QTNF3       | GC | ACTR3B    | GC |
| PKP2     | GC | LALBA         | GC | NCEH1     | GC |
| GRM2     | GC | PTBP1         | GC | HMGCLL1   | GC |
| BACE1    | GC | ENSG000002308 | GC | HERPUD2   | GC |

---

|          |    |          |    |          |    |
|----------|----|----------|----|----------|----|
| SLC2A2   | GC | DNAJC14  | GC | FOXD2    | GC |
| MAPK3    | GC | TCF3     | GC | TMEM45B  | GC |
| KLHL40   | GC | TRO      | GC | NLRP8    | GC |
| PF4      | GC | YIF1A    | GC | FAM180A  | GC |
| POU2AF1  | GC | SGCB     | GC | PLEKHS1  | GC |
| HINT1    | GC | ESRRG    | GC | TRABD2B  | GC |
| CORIN    | GC | ZCCHC12  | GC | CFAP77   | GC |
| KRT5     | GC | SYNJ2    | GC | UMAD1    | GC |
| KDM6A    | GC | ADH7     | GC | NPM2     | GC |
| PROS1    | GC | EPS15    | GC | TMEM178A | GC |
| SLC18A1  | GC | CX3CL1   | GC | C8orf34  | GC |
| KNG1     | GC | RIPK1    | GC | CRYBG2   | GC |
| PFKM     | GC | BLZF1    | GC | USP48    | GC |
| IL17F    | GC | LHFPL5   | GC | BTF3     | GC |
| APRT     | GC | MAP3K7   | GC | NCBP2    | GC |
| GRIP1    | GC | LHX8     | GC | CLSTN3   | GC |
| ABCC2    | GC | ATG9A    | GC | IFRD2    | GC |
| CD8A     | GC | PRPF40B  | GC | EIF2S2P7 | GC |
| DHCR24   | GC | MEST     | GC | ITGB7    | GC |
| RIMS1    | GC | TRIM2    | GC | MAPK15   | GC |
| ZFYVE27  | GC | NIF3L1   | GC | IFNW1    | GC |
| CX3CR1   | GC | H4C15    | GC | MRPL48   | GC |
| TRPM1    | GC | GNA14    | GC | SETD4    | GC |
| PSAT1    | GC | MLST8    | GC | OR52K1   | GC |
| TRAPPC2  | GC | KCNB2    | GC | MMP27    | GC |
| LMOD1    | GC | TSPY1    | GC | LNX2     | GC |
| TNFSF15  | GC | PSIP1    | GC | DEFA6    | GC |
| LMAN2L   | GC | H4C14    | GC | TASP1    | GC |
| NR2E3    | GC | SACM1L   | GC | CPNE2    | GC |
| WNT7A    | GC | HOOK1    | GC | MTIF3    | GC |
| TGM5     | GC | ATG2A    | GC | TSTD1    | GC |
| LTBP2    | GC | RAMP3    | GC | ARRDC1   | GC |
| TPM1     | GC | F2R      | GC | RANBP3L  | GC |
| IFNA1    | GC | IRF7     | GC | C6orf201 | GC |
| PLN      | GC | CSK      | GC | DBNDD2   | GC |
| TIMP1    | GC | ENAM     | GC | LSMEM2   | GC |
| SERPINH1 | GC | AKR7A2   | GC | PNMA8A   | GC |
| ADM      | GC | SERPINB2 | GC | MIR1179  | GC |
| RLS1     | GC | VPS16    | GC | RPS23P3  | GC |
| RCBTB1   | GC | FOXMI    | GC | CYP27C1  | GC |
| BSND     | GC | DNAJC30  | GC | RBM5     | GC |
| SLC25A11 | GC | TUG1     | GC | DEFA4    | GC |
| EFNB1    | GC | PLIN3    | GC | RAB24    | GC |
| ALX3     | GC | GABARAP  | GC | HOXD4    | GC |

---

|         |      |              |    |              |    |
|---------|------|--------------|----|--------------|----|
| WIPI2   | GC   | ITPA         | GC | FAM107A      | GC |
| TK2     | GC   | GABARAPL2    | GC | ARHGAP30     | GC |
| NF2     | GC   | LMO2         | GC | RNF167       | GC |
| STIM1   | GC   | KNOP1        | GC | PM20D2       | GC |
| IL5     | GC   | GYPE         | GC | TMEM26       | GC |
| CCR3    | GC   | DPY19L1      | GC | PIWIL3       | GC |
| EXOSC3  | GC   | ME2          | GC | ZNF90        | GC |
| TTBK2   | GC   | EMX1         | GC | ZNF454       | GC |
| FHL1    | GC   | PCSK2        | GC | OR7G1        | GC |
| GYPB    | GC   | RIPPLY3      | GC | FASTKD5      | GC |
| HNF1A   | GC   | SNTB2        | GC | ZNF486       | GC |
| FOXE1   | GC   | ATP5PO       | GC | ZNF626       | GC |
| GRM3    | GC   | RILP         | GC | ANKRD30B     | GC |
| TNXB    | GC   | CD1E         | GC | OR7G2        | GC |
| LIPA    | GC   | MIR484       | GC | PPP5D1       | GC |
| MT-ND4  | GC   | CGB3         | GC | RTL6         | GC |
| PLA2G7  | GC   | RPLP1        | GC | PNMA8B       | GC |
| PREPL   | GC   | MYH10        | GC | ZNF826P      | GC |
| PHKA2   | GC   | LMLN         | GC | LINC01619    | GC |
| CDK20   | GC   | WDR20        | GC | GUCY2EP      | GC |
| MT-CO2  | GC   | C17orf107    | GC | POM121L10P   | GC |
| PGR     | GC   | MIR1304      | GC | RPS2P6       | GC |
| KCNE3   | GC   | CXCR5        | GC | ECI2-DT      | GC |
| COG8    | GC   | SYNM         | GC | MIR4465      | GC |
| KARS1   | GC   | DHRS9        | GC | PNMA8C       | GC |
| KCNV2   | GC   | LPP          | GC | LOC728739    | GC |
| HSD11B2 | GC   | CNIH3        | GC | RPL30P3      | GC |
| COL4A3  | GC   | RUNX1T1      | GC | PAK6         | GC |
| FMN2    | GC   | MED19        | GC | FAAH2        | GC |
| TYROBP  | GC   | KAAG1        | GC | VWA5A        | GC |
| RB1     | GC   | LOC110121269 | GC | OR52B4       | GC |
| TJP2    | GC   | TK1          | GC | LOC101928387 | GC |
| MAFD2   | GC   | IL1RL1       | GC | USP32        | GC |
| MAFD8   | GC   | KRT19        | GC | AATK         | GC |
|         | OMIM |              |    |              |    |
| MAFD9   | GC   | MKI67        | GC | CLDN23       | GC |
|         | OMIM |              |    |              |    |
| LIG4    | GC   | RAMP2        | GC | SAMD4B       | GC |
| MEGF10  | GC   | TOR1AIP1     | GC | ACBD7        | GC |
| PRKCD   | GC   | TMEM79       | GC | KLHL23       | GC |
| IL1R1   | GC   | NSUN6        | GC | PRSS55       | GC |
| GSTM1   | GC   | NPAS1        | GC | ACTL8        | GC |
| MIR210  | GC   | GAS8         | GC | LINC00907    | GC |
| PIGT    | GC   | CD46         | GC | LOC284930    | GC |

|            |      |              |    |           |    |
|------------|------|--------------|----|-----------|----|
| CERT1      | GC   | ROGDI        | GC | POLD2P1   | GC |
| FGB        | GC   | RNU6ATAC     | GC | ASS1P11   | GC |
| ALAD       | GC   | STX8         | GC | RPL31P35  | GC |
| MBOAT7     | GC   | NBR1         | GC | PARD6A    | GC |
| PHF6       | GC   | SEL1L        | GC | CTNNAL1   | GC |
| DSC2       | GC   | OSM          | GC | ASB13     | GC |
| NPR2       | GC   | PUM1         | GC | IFNA21    | GC |
| MAFD3      | GC   | ADH6         | GC | MPRIP     | GC |
| MAFD4      | GC   | NOVA1        | GC | CEP85     | GC |
| MAFD5      | GC   | CSN3         | GC | RABL3     | GC |
|            | OMIM |              |    |           |    |
| MAFD6      | GC   | AGO2         | GC | TPGS2     | GC |
| IDO1       | GC   | POLR2G       | GC | DDIAS     | GC |
| ATP6V1A    | GC   | CYP51A1      | GC | RASSF10   | GC |
| HMGCL      | GC   | PDIA4        | GC | OR5T3     | GC |
| LOC1095047 | GC   | SYNCRIP      | GC | ODF3B     | GC |
| 28         |      |              |    |           |    |
| HIVEP1     | GC   | FAS-AS1      | GC | C19orf18  | GC |
| CTSC       | GC   | SLC22A18     | GC | FBXO47    | GC |
| KDM6B      | GC   | KCNT2        | GC | C5orf66   | GC |
| BMPR2      | GC   | FGF4         | GC | CSNK1G3   | GC |
| GMPPA      | GC   | MCM5         | GC | CCDC167   | GC |
| EDC3       | GC   | ERI3         | GC | LINC00893 | GC |
| LAMA1      | GC   | KIAA1586     | GC | IFN1@     | GC |
| RPS3A      | GC   | FCER1A       | GC | PPP1R21   | GC |
| WARS1      | GC   | PDS5A        | GC | STMN4     | GC |
| ATP2A1     | GC   | KAT5         | GC | IPO4      | GC |
| AVPR1A     | GC   | KYAT1        | GC | KCTD18    | GC |
| YY1        | GC   | KAT2B        | GC | CRYL1     | GC |
| OAT        | GC   | AKR1B1       | GC | RHPN2     | GC |
| IMMP2L     | GC   | RTN4IP1      | GC | OLFML3    | GC |
| RPGRIP1L   | GC   | FADS2        | GC | TUBD1     | GC |
| RBM8A      | GC   | XIRP2        | GC | TOM1L1    | GC |
| MYPN       | GC   | AP2B1        | GC | CCNG2     | GC |
| MIR93      | GC   | EFTUD2       | GC | ADGRL2    | GC |
| VRK1       | GC   | TLDC2        | GC | GPR6      | GC |
| FKBP10     | GC   | RSU1         | GC | SLC46A3   | GC |
| G6PC3      | GC   | EEF1AKNMT    | GC | RNFT1     | GC |
| ZC3H14     | GC   | INSIG1       | GC | UBXN2A    | GC |
| CDK5RAP2   | GC   | LOC106029312 | GC | SNX29     | GC |
| TGFBI      | GC   | SHPK         | GC | ADSS2     | GC |
| CSF2       | GC   | MCHR2-AS1    | GC | OR2S2     | GC |
| METTL23    | GC   | S100A7       | GC | OR52D1    | GC |
| TRAF6      | GC   | CA10         | GC | C2orf42   | GC |



|         |    |          |    |              |      |
|---------|----|----------|----|--------------|------|
| RAB40AL | GC | MBNL3    | GC | OR10T2       | GC   |
| DGCR2   | GC | RBBP5    | GC | SLC25A48     | GC   |
| SPTLC2  | GC | TAPBPL   | GC | OR10K1       | GC   |
| PCBD1   | GC | PSPH     | GC | OR52E6       | GC   |
| GRIK4   | GC | YAP1     | GC | MORN2        | GC   |
| ZFP57   | GC | MAU2     | GC | OR8S1        | GC   |
| USP7    | GC | DGAT2    | GC | EEF1AKMT2    | GC   |
| ABCG5   | GC | DUOX1    | GC | TPTE2P1      | GC   |
| PTK7    | GC | NPL      | GC | HBBP1        | GC   |
| RGS4    | GC | CLEC4C   | GC | KU-MEL-3     | GC   |
| KRT16   | GC | PEE1     | GC | LOC154449    | GC   |
| GYG1    | GC | CWC22    | GC | RPL21P119    | GC   |
| TECR    | GC | ATP13A4  | GC | TVP23CP2     | GC   |
| RARS2   | GC | IGES     | GC | LOC101927078 | GC   |
| DHODH   | GC | CYB561D2 | GC | AIMP1P1      | GC   |
| BBS9    | GC | VASP     | GC | HDAC10       | GC   |
| SARDH   | GC | CENPI    | GC | PIDD1        | GC   |
| MAPK8   | GC | HIPK3    | GC | UTS2B        | GC   |
| PCK1    | GC | IST1     | GC | PCDHB10      | GC   |
| SCT     | GC | FCN2     | GC | EOLA1        | GC   |
| CAPN10  | GC | SH2D3A   | GC | EOLA2        | GC   |
| CRLF1   | GC | HSF1     | GC | TRAJ10       | GC   |
| ALX4    | GC | PRR5     | GC | PTGER1       | GC   |
| GP1BB   | GC | SOX2-OT  | GC | KLHL20       | GC   |
| HRH1    | GC | ESCO1    | GC | APOL6        | GC   |
| RLS2    | GC | SPTSSB   | GC | CLDND1       | GC   |
| NPHS1   | GC | AATF     | GC | NASP         | GC   |
| COL6A1  | GC | CEACAM5  | GC | ZDHHC16      | GC   |
| KCNC3   | GC | UCP3     | GC | ATP5MC3      | GC   |
| ICOSLG  | GC | CCL24    | GC | LINC00894    | GC   |
| TCIRG1  | GC | APLNR    | GC | DNAJB1P1     | GC   |
| CDH13   | GC | ABCC4    | GC | LINC02112    | GC   |
| SP7     | GC | CDC42SE2 | GC | PEX10        | OMIM |
| RARB    | GC | DLG2-AS1 | GC | NALD         | OMIM |
| CLU     | GC | PANK4    | GC | PBD6A        | OMIM |
| VRK2    | GC | CARMIL2  | GC | PBD6B        | OMIM |
| CYCS    | GC | XIRP1    | GC | PER3         | OMIM |
| PSMB9   | GC | RAB6A    | GC | FASPS3       | OMIM |
| PFN1    | GC | CNTNAP5  | GC | SLC45A1      | OMIM |
| RNF135  | GC | UBA1     | GC | DNB5         | OMIM |
| VPS11   | GC | SLC30A8  | GC | IDDNPF       | OMIM |
| MBTPS2  | GC | FKBP1B   | GC | RERE         | OMIM |
| MSMB    | GC | COQ7     | GC | NEDBEH       | OMIM |
| DSG1    | GC | STOM     | GC | PEX14        | OMIM |

|          |    |                     |            |          |      |
|----------|----|---------------------|------------|----------|------|
| SPINK5   | GC | INS-IGF2            | GC         | PBD13A   | OMIM |
| GFPT1    | GC | RNF207              | GC         | DDOST    | OMIM |
| FBXO31   | GC | ARHGEF26            | GC         | OST      | OMIM |
| CFAP410  | GC | OR1L6               | GC         | OST48    | OMIM |
| RLS4     | GC | FAM50B              | GC         | CDG1R    | OMIM |
| IFNGR1   | GC | NPY4R               | GC         | EPHB2    | OMIM |
| DGCR6    | GC | DEPTOR              | GC         | EPHT3    | OMIM |
| MAN2B1   | GC | LOC109029533        | GC         | DRT      | OMIM |
| MVK      | GC | RXFP3               | GC         | ERK      | OMIM |
| CGA      | GC | SLC6A15             | GC         | PCBC     | OMIM |
| XYLT2    | GC | SNX10               | GC         | CAPB     | OMIM |
| PKLR     | GC | NEUROG2             | GC         | BDPLT22  | OMIM |
| TTF2     | GC | PHLDA2              | GC         | DHDDS    | OMIM |
| TBX21    | GC | RRIS                | GC<br>OMIM | HDS      | OMIM |
| TMEM107  | GC | STC1                | GC         | RP59     | OMIM |
| F7       | GC | ENGASE              | GC         | DEDSM    | OMIM |
| TRIP11   | GC | FLG-AS1             | GC         | SVBP     | OMIM |
| AP3B2    | GC | SP100               | GC         | CCDC23   | OMIM |
| CACNA2D1 | GC | BIRC5               | GC         | NEDAHM   | OMIM |
| MIR20A   | GC | THSD4               | GC         | ALG6     | OMIM |
| MIR342   | GC | CNIH1               | GC         | CDG1C    | OMIM |
| HSPA8    | GC | MIR598              | GC         | PGM1     | OMIM |
| TRPC3    | GC | LRRC2-AS1           | GC         | GSD14    | OMIM |
| COL6A2   | GC | PPP1R8              | GC         | CDG1T    | OMIM |
| SFTPB    | GC | SAA1                | GC         | SARS1    | OMIM |
| ARSG     | GC | GPR88               | GC         | SARS     | OMIM |
| CLCN4    | GC | LOC106728418        | GC         | SERS     | OMIM |
| CHRNA5   | GC | OR1C1               | GC         | NEDMAS   | OMIM |
| PPARA    | GC | NATD1               | GC         | WARS2    | OMIM |
| KCNQ1OT1 | GC | ENSG000002124<br>11 | GC         | NEMMLAS  | OMIM |
| MIR659   | GC | EA3                 | GC         | PEX11B   | OMIM |
| CCDC78   | GC | EA7                 | GC         | PEX14B   | OMIM |
| GABRG3   | GC | EA8                 | GC         | PRUNE1   | OMIM |
| HSPB3    | GC | LAT2                | GC         | DRES17   | OMIM |
| ACY1     | GC | EID1                | GC         | NMIHBA   | OMIM |
| ARFGEF2  | GC | CKAP5               | GC         | ARHGEF2  | OMIM |
| RLS3     | GC | DROSHA              | GC         | GEFH1    | OMIM |
| RLS5     | GC | ZMYND10             | GC         | KIAA0651 | OMIM |
| RLS8     | GC | TLNRD1              | GC         | NEDMHM   | OMIM |
| ABCG8    | GC | P2RX5               | GC         | BDET     | OMIM |
| HOMER1   | GC | KRIT1               | GC         | PEX19 P  | OMIM |
| ABCB6    | GC | CDC27               | GC         | XF       | OMIM |

|         |    |          |    |             |      |
|---------|----|----------|----|-------------|------|
| PON2    | GC | BICC1    | GC | HK33        | OMIM |
| GYS2    | GC | ENPP3    | GC | D1S2223E    | OMIM |
| POMT2   | GC | BANK1    | GC | PBD12A      | OMIM |
| DDX11   | GC | TTC3     | GC | UFC1        | OMIM |
| ANTXR2  | GC | FGF16    | GC | NEDSG       | OMIM |
| PDE5A   | GC | DUSP4    | GC | NFASC       | OMIM |
| CYP2C9  | GC | HBQ1     | GC | KIAA0756    | OMIM |
| TUBA4A  | GC | ASAH2    | GC | NEDCPMD     | OMIM |
| ZDHHC9  | GC | UCN      | GC | COG2        | OMIM |
| PPP1R1B | GC | KCNJ3    | GC | LDLC        | OMIM |
| TNNT1   | GC | SLC10A1  | GC | CDG2Q       | OMIM |
| TUBB1   | GC | MIR361   | GC | PPP1CB      | OMIM |
| PLCE1   | GC | HMX2     | GC | NSLH2       | OMIM |
| ITIH3   | GC | DDI2     | GC | FBXO11      | OMIM |
| KCNN3   | GC | NFE2L1   | GC | FBX11       | OMIM |
| CDKN1A  | GC | CTNNA1   | GC | VIT1        | OMIM |
| ATF6    | GC | HK2      | GC | PRMT9       | OMIM |
| MSX2    | GC | CHST3    | GC | IDDFBA      | OMIM |
| MAX     | GC | PSMF1    | GC | PEX13       | OMIM |
| BGN     | GC | ICOS     | GC | ZWS         | OMIM |
| PIGC    | GC | TIMM23   | GC | PBD11A      | OMIM |
| PNOC    | GC | SCFD1    | GC | PBD11B      | OMIM |
| TBX20   | GC | RPS6KA2  | GC | MOGS        | OMIM |
| YWHAG   | GC | ATP11C   | GC | GCS1        | OMIM |
| BRWD3   | GC | CD1B     | GC | CDG2B       | OMIM |
| FZD4    | GC | MIR431   | GC | GGCX        | OMIM |
| DLGAP1  | GC | MIR539   | GC | VKCFD1      | OMIM |
| AGER    | GC | INSM2    | GC | ADHD5       | OMIM |
| PRKG1   | GC | TMEM161B | GC | SMPD4       | OMIM |
| CDH3    | GC | DDIT4    | GC | NSMASE3     | OMIM |
| MAF     | GC | CALHM1   | GC | KIAA1418    | OMIM |
| HYDIN   | GC | TIAM1    | GC | NEDMABA     | OMIM |
| CRHR2   | GC | FRS2     | GC | CCDC115     | OMIM |
| OPRL1   | GC | GZMM     | GC | CCP1        | OMIM |
| COL6A3  | GC | SLC1A6   | GC | CDG2O       | OMIM |
| MED13L  | GC | NPC1L1   | GC | TBR1 IDIDAS | OMIM |
| CHRM1   | GC | GSX1     | GC | SCN9A       | OMIM |
| CHD1    | GC | MIR10B   | GC | NENA        | OMIM |
| TEF     | GC | SPTBN1   | GC | PN1         | OMIM |
| COX15   | GC | CSNK2A2  | GC | FEB3B       | OMIM |
| NPHS2   | GC | CHRD     | GC | GEFSP7      | OMIM |
| SLC45A2 | GC | ESRRB    | GC | FNP         | OMIM |
| ALDH6A1 | GC | TEKT2    | GC | HSAN2D      | OMIM |
| DPP4    | GC | ZIC4     | GC | METTL5      | OMIM |

|         |    |            |    |          |      |
|---------|----|------------|----|----------|------|
| DGCR8   | GC | ARHGAP26   | GC | HSPC133  | OMIM |
| SNURF   | GC | MCHR1      | GC | MRT72    | OMIM |
| SORL1   | GC | SNORD109B  | GC | DYNC1I2  | OMIM |
| TRPM4   | GC | RSPH6A     | GC | DNCI2    | OMIM |
| PTGDS   | GC | RB1CC1     | GC | IC2      | OMIM |
| RPS23   | GC | MC3R       | GC | NEDMIBA  | OMIM |
| TFAP2A  | GC | SYVN1      | GC | LNPB     | OMIM |
| LRP1    | GC | CKS1B      | GC | KIAA1715 | OMIM |
| ABCA3   | GC | RMDN3      | GC | NEDEHCC  | OMIM |
| PBX1    | GC | ACTR3C     | GC | HECW2    | OMIM |
| COQ6    | GC | MGRN1      | GC | NEDL2    | OMIM |
| ITM2B   | GC | PCDH8      | GC | KIAA1301 | OMIM |
| IL15    | GC | HYAL1      | GC | NDHSAL   | OMIM |
| LARGE1  | GC | KLRC1      | GC | ZNF142   | OMIM |
| ASNS    | GC | CACNB3     | GC | NEDISHM  | OMIM |
| TMPO    | GC | DEGS2      | GC | PER2     | OMIM |
| COA8    | GC | TBPL1      | GC | FASPS1   | OMIM |
| VSX2    | GC | ADH5       | GC | KIAA0347 | OMIM |
| SDHD    | GC | STX10      | GC | BRPF1    | OMIM |
| FGF3    | GC | RCVRN      | GC | BR140    | OMIM |
| COL4A1  | GC | TEKT1      | GC | IDDDFP   | OMIM |
| MSH2    | GC | GANAB      | GC | IQSEC1   | OMIM |
| ADH1B   | GC | SLC7A10    | GC | KIAA0763 | OMIM |
| H19-ICR | GC | HCN2       | GC | IDDSSBA  | OMIM |
| ANO10   | GC | TCTE1      | GC | NGLY1    | OMIM |
| KCNAB2  | GC | PCDHB1     | GC | PNG1     | OMIM |
| MLH1    | GC | C6orf62    | GC | CDDG     | OMIM |
| ARNTL2  | GC | MIR3176    | GC | CDG1V    | OMIM |
| NACC1   | GC | PWRN2      | GC | STT3B    | OMIM |
| STX16   | GC | PPM1K      | GC | SIMP     | OMIM |
| ORAI1   | GC | MFAP2      | GC | CDG1X    | OMIM |
| TBCK    | GC | FASTK      | GC | PLCD1    | OMIM |
| NFU1    | GC | WDR5       | GC | NDNC3    | OMIM |
| MASP2   | GC | ALOX12     | GC | CTNNB1   | OMIM |
| SIX5    | GC | SLC4A11    | GC | NEDSDV   | OMIM |
| MORC2   | GC | LXN        | GC | EVR7     | OMIM |
| SP1     | GC | AKT1S1     | GC | DHX30    | OMIM |
| RBM20   | GC | DMAP1      | GC | DDX30    | OMIM |
| POLR2A  | GC | DOCK4      | GC | RETCOR   | OMIM |
| COL25A1 | GC | TAOK3      | GC | KIAA0890 | OMIM |
| NGFR    | GC | GOLGA8F    | GC | NEDMIAL  | OMIM |
| GABRB1  | GC | GOLGA8G    | GC | DOCK3    | OMIM |
| CAMK2B  | GC | GOLGA8EP   | GC | NEDIDHA  | OMIM |
| ZNF711  | GC | SNORD115-2 | GC | RFT1     | OMIM |

|          |    |             |    |          |      |
|----------|----|-------------|----|----------|------|
| SLC13A3  | GC | SNORD115-10 | GC | CDG1N    | OMIM |
| TRPC6    | GC | SNORD115-11 | GC | SSD      | OMIM |
| CALB2    | GC | SNORD115-12 | GC | ZBTB11   | OMIM |
| TWIST2   | GC | SNORD115-13 | GC | MRT69    | OMIM |
| PDX1     | GC | SNORD115-14 | GC | P2RY12   | OMIM |
| CDSN     | GC | SNORD115-15 | GC | P2Y12    | OMIM |
| NLRP12   | GC | SNORD115-16 | GC | BDPLT8   | OMIM |
| LAMP1    | GC | SNORD115-17 | GC | RSRC1    | OMIM |
| CYB5A    | GC | SNORD115-18 | GC | SRRP53   | OMIM |
| BMP1     | GC | SNORD115-19 | GC | MRT70    | OMIM |
| NAA15    | GC | SNORD115-20 | GC | AP2M1    | OMIM |
| IRS2     | GC | SNORD115-21 | GC | CLAPM1   | OMIM |
| GPNMB    | GC | SNORD115-22 | GC | MRD60    | OMIM |
| PDLIM5   | GC | SNORD115-23 | GC | ALG3     | OMIM |
| ISCA2    | GC | SNORD115-25 | GC | NOT56L   | OMIM |
| FCGR3B   | GC | SNORD115-26 | GC | CDGS4    | OMIM |
| ZNF408   | GC | SNORD115-29 | GC | CDG1D    | OMIM |
| HLA-DQA2 | GC | SNORD115-3  | GC | DRD5     | OMIM |
| HSPA4    | GC | SNORD115-30 | GC | DRD1B    | OMIM |
| ACO1     | GC | SNORD115-31 | GC | DRD1L2   | OMIM |
| NAIP     | GC | SNORD115-32 | GC | SRD5A3   | OMIM |
| CDKN1B   | GC | SNORD115-33 | GC | SRD5A2L  | OMIM |
| MIR30D   | GC | SNORD115-34 | GC | CDG1Q    | OMIM |
| FGF17    | GC | SNORD115-35 | GC | KRIZI    | OMIM |
| KCNK4    | GC | SNORD115-36 | GC | CDG1Q    | OMIM |
| MPP5     | GC | SNORD115-37 | GC | TMEM165  | OMIM |
| GDF9     | GC | SNORD115-38 | GC | FT27     | OMIM |
| KISS1    | GC | SNORD115-39 | GC | CDG2K    | OMIM |
| SNX27    | GC | SNORD115-4  | GC | SEC31A   | OMIM |
| STAG3    | GC | SNORD115-40 | GC | SEC31L1  | OMIM |
| ARV1     | GC | SNORD115-41 | GC | KIAA0905 | OMIM |
| NR1H2    | GC | PRR16       | GC | NEDSOSB  | OMIM |
| TRMT1    | GC | WNT2B       | GC | SLC39A8  | OMIM |
| UBE2T    | GC | ACY3        | GC | BIGM103  | OMIM |
| MMADHC   | GC | OPCML       | GC | CDG2N    | OMIM |
| LGALS4   | GC | DMWD        | GC | PAND3    | OMIM |
| ETV6     | GC | NNAT        | GC | SLC6A19  | OMIM |
| PHACTR1  | GC | SPRR3       | GC | HND      | OMIM |
| MYO1H    | GC | MIR376A1    | GC | ADHD4    | OMIM |
| VPS53    | GC | SMC5        | GC | ZSWIM6   | OMIM |
| HTRA1    | GC | CPE         | GC | KIAA1577 | OMIM |
| NCAM1    | GC | EEF1D       | GC | AFND     | OMIM |
| DMGDH    | GC | KCNMB3      | GC | NEDMAGA  | OMIM |
| WNT10B   | GC | KCNQ4       | GC | RAD50    | OMIM |

|         |    |              |    |         |      |
|---------|----|--------------|----|---------|------|
| PDP1    | GC | METTTL27     | GC | NBSLD   | OMIM |
| NUS1    | GC | DECR1        | GC | PPP2CA  | OMIM |
| LAMA4   | GC | NAB2         | GC | NEDLBA  | OMIM |
| JPH2    | GC | RPL7A        | GC | PDGFRB  | OMIM |
| CYFIP1  | GC | CCL13        | GC | PDGFR   | OMIM |
| MIR143  | GC | RABAC1       | GC | IBGC4   | OMIM |
| MIR150  | GC | SNORD108     | GC | IMF1    | OMIM |
| MIR433  | GC | SNORD109A    | GC | PENTT   | OMIM |
| FCGR2A  | GC | SNORD64      | GC | KOGS    | OMIM |
| TRIP4   | GC | DUSP19       | GC | VAR51   | OMIM |
| MIR30B  | GC | PHF11        | GC | VAR5    | OMIM |
| HAVCR2  | GC | CRLF2        | GC | G7A     | OMIM |
| PDE4B   | GC | ATG13        | GC | VAR52   | OMIM |
| MTNR1B  | GC | CLDN4        | GC | NDMSCA  | OMIM |
| BCL2    | GC | TEKT4        | GC | FKBP5   | OMIM |
| IL16    | GC | IAH1         | GC | FKBP51  | OMIM |
| CUL4B   | GC | NBPF9        | GC | PEX6    | OMIM |
| KCNE5   | GC | CLDN1        | GC | PXAAA1  | OMIM |
| COL4A4  | GC | ACCS         | GC | PAF2    | OMIM |
| ACTN4   | GC | LOC106029311 | GC | PBD4A   | OMIM |
| GPR50   | GC | LOC106029313 | GC | PDB4B   | OMIM |
| FADS1   | GC | PRNT         | GC | HMLR2   | OMIM |
| HOXA2   | GC | ADAMTS14     | GC | ADHD3   | OMIM |
| TLR9    | GC | ANGPTL6      | GC | SLC17A5 | OMIM |
| CCDC103 | GC | FASN         | GC | SIASD   | OMIM |
| ENPP1   | GC | INHBB        | GC | SLD     | OMIM |
| SREBF1  | GC | DMRT3        | GC | SLC35A1 | OMIM |
| MNX1    | GC | LRRC75B      | GC | CST     | OMIM |
| RSPO4   | GC | C22orf15     | GC | CDG2F   | OMIM |
| TRPM7   | GC | DENND1A      | GC | WASF1   | OMIM |
| AIF1    | GC | IL23A        | GC | WAVE    | OMIM |
| ZEB1    | GC | MTHFSD       | GC | WAVE1   | OMIM |
| KCTD7   | GC | NPHP3-ACAD11 | GC | SCAR1   | OMIM |
| PRLR    | GC | TREM1        | GC | NEDALVS | OMIM |
| FKBP14  | GC | CUL2         | GC | NUS1    | OMIM |
| MIR142  | GC | CARS1        | GC | NGBR    | OMIM |
| MIR320A | GC | GLS2         | GC | C6orf68 | OMIM |
| AASS    | GC | ASH2L        | GC | CDG1AA  | OMIM |
| LRRC56  | GC | UCP1         | GC | MRD55   | OMIM |
| SNCG    | GC | HOXA3        | GC | MAFD6   | OMIM |
| CLCNKA  | GC | LETM1        | GC | BPAD    | OMIM |
| MIR137  | GC | CKAP4        | GC | PEX7    | OMIM |
| ARIH1   | GC | ILK          | GC | RCDP1   | OMIM |
| CNOT3   | GC | KLK3         | GC | PBD9B   | OMIM |

---

|           |    |         |    |          |      |
|-----------|----|---------|----|----------|------|
| TUBA8     | GC | VPREB1  | GC | PEX3     | OMIM |
| MICU1     | GC | NOL3    | GC | PBD10A   | OMIM |
| CDC6      | GC | C5AR1   | GC | PBD10B   | OMIM |
| PIGW      | GC | BCL7B   | GC | FGFR1OP  | OMIM |
| LMBRD1    | GC | CDX2    | GC | FOP      | OMIM |
| OSTM1     | GC | OXA1L   | GC | DLL1     | OMIM |
| PPP2R1A   | GC | CUL4A   | GC | DELTA1   | OMIM |
| KIF5C     | GC | GLG1    | GC | NEDBAS   | OMIM |
| STOX1     | GC | MT-TG   | GC | INTS1    | OMIM |
| TAC3      | GC | MINK1   | GC | INT1     | OMIM |
| DAB1      | GC | FABP4   | GC | KIAA1440 | OMIM |
| ANKRD1    | GC | NCK1    | GC | NDCAGF   | OMIM |
| ATP10A    | GC | ZFP28   | GC | BRAT1    | OMIM |
| MIR133B   | GC | CSRNP3  | GC | BAAT1    | OMIM |
| VAX1      | GC | MAMLD1  | GC | C7orf27  | OMIM |
| SRD5A1    | GC | WNT11   | GC | RMFSL    | OMIM |
| CSN1S1    | GC | CDCA5   | GC | NEDCAS   | OMIM |
| SLC2A9    | GC | TLL1    | GC | WIPI2    | OMIM |
| TBX19     | GC | CYTH4   | GC | IDSSA    | OMIM |
| SLC39A8   | GC | RPLP0   | GC | CDK13    | OMIM |
| PTPRD     | GC | EOMES   | GC | DC2L5    | OMIM |
| GFM1      | GC | MTX1    | GC | CHED     | OMIM |
| GTS       | GC | NOTUM   | GC | CHDFIDD  | OMIM |
| UBQLN4    | GC | HOXA11  | GC | PEX1     | OMIM |
| VAMP2     | GC | GYG2    | GC | ZWS1     | OMIM |
| CLPB      | GC | RRAGC   | GC | PBD1A    | OMIM |
| GLO1      | GC | DMTN    | GC | PBD1B    | OMIM |
| BCL11A    | GC | RGS6    | GC | HMLR1    | OMIM |
| GPX4      | GC | ADAM12  | GC | ACTL6B   | OMIM |
| FARS2     | GC | NLRP2   | GC | BAF53B   | OMIM |
| NBN       | GC | SH2D3C  | GC | IDSSAD   | OMIM |
| KCNJ18    | GC | CACNB1  | GC | EIEE76   | OMIM |
| CD40      | GC | CKB     | GC | PUS7     | OMIM |
| MIRLET7D  | GC | NAP1L4  | GC | KIAA1897 | OMIM |
| XYLT1     | GC | IL12RB2 | GC | IDDABS   | OMIM |
| SLC17A7   | GC | SPATA22 | GC | COG5     | OMIM |
| SFTPC     | GC | NDRG2   | GC | GOLTC1   | OMIM |
| MBTPS1    | GC | BNC2    | GC | GTC90    | OMIM |
| KLHL7     | GC | DOP1B   | GC | CDG2I    | OMIM |
| CACNA2D2  | GC | PSG3    | GC | FOXP2    | OMIM |
| SCN1A-AS1 | GC | PTPN5   | GC | SPCH1    | OMIM |
| TSEN34    | GC | ABALON  | GC | TNRC10   | OMIM |
| HNRNPK    | GC | GLYAT   | GC | CAGH44   | OMIM |
| IL18R1    | GC | RPS6KA6 | GC | PEX2     | OMIM |

---

|              |    |           |    |          |        |      |
|--------------|----|-----------|----|----------|--------|------|
| SECISBP2     | GC | RUNX3     | GC | PAF1     | OMIM   |      |
| CARS2        | GC | NELFCD    | GC | PMP35    | OMIM   |      |
| PIGL         | GC | THAP7     | GC | PBD5A    | OMIM   |      |
| TNNI3K       | GC | PAX7      | GC | PBD5B    | OMIM   |      |
| FAT4         | GC | YPEL1     | GC | PXMP3    | OMIM   |      |
| DHPS         | GC | ABHD11    | GC | OTUD6B   | OMIM   |      |
| SRCAP        | GC | GNAT3     | GC | DUBA5    | OMIM   |      |
| HRH2         | GC | NSUN7     | GC | IDDFSDA  | OMIM   |      |
| ALDH4A1      | GC | LACTB     | GC | INTS8    | OMIM   |      |
| SDHB         | GC | KEL       | GC | INT8     | OMIM   |      |
| LONP1        | GC | WNT9A     | GC | NEDCHS   | OMIM   |      |
| BAX          | GC | CYP1A1    | GC | FZD6     | OMIM   |      |
| AMPD1        | GC | PDHB      | GC | NDNC10   | OMIM   |      |
| NECAP1       | GC | UBR5      | GC | PLAA     | OMIM   |      |
| VPS13D       | GC | SLC26A7   | GC | PLAP     | OMIM   |      |
| STAG1        | GC | UTS2R     | GC | NDMSBA   | OMIM   |      |
| MIR206       | GC | RNF146    | GC | B4GALT1  | OMIM   |      |
| NRXN2        | GC | MAB21L1   | GC | GGTB2    | OMIM   |      |
| CHRNA3       | GC | PITPNM2   | GC | GT1      | OMIM   |      |
| MSH6         | GC | WDR41     | GC | GTB      | OMIM   |      |
| ESCO2        | GC | ATP2B4    | GC | CDG2D    | OMIM   |      |
| CBSL         | GC | TMEM189   | GC | PRKACG   | OMIM   |      |
| DCAF8        | GC | FKBP6     | GC | BDPLT19  | OMIM   |      |
| ATG5         | GC | FBN3      | GC | GPR51    | OMIM   |      |
| TUBG1        | GC | TEN1      | GC | EIEE59   | OMIM   |      |
| PAEP         | GC | RHOA      | GC | DrugBank | NDPLHS | OMIM |
| CARD11       | GC | NECTIN4   | GC | ALG2     | OMIM   |      |
| LOC108663987 | GC | SIK1B     | GC | CDGII    | OMIM   |      |
| XPNPEP3      | GC | CAMK2N2   | GC | CMSTA3   | OMIM   |      |
| PORCN        | GC | SLC30A1   | GC | CMS14    | OMIM   |      |
| PGK1         | GC | PLS1      | GC | PAND2    | OMIM   |      |
| DPYS         | GC | OSR2      | GC | DPM2     | OMIM   |      |
| CNTN4        | GC | TIMM23B   | GC | CDG1U    | OMIM   |      |
| ERCC4        | GC | MRT19     | GC | DOLK     | OMIM   |      |
| REEP1        | GC | MRT23     | GC | TMEM15   | OMIM   |      |
| SLC25A3      | GC | MRT24     | GC | DK1      | OMIM   |      |
| CSF1         | GC | MRT25     | GC | SEC59    | OMIM   |      |
| CNC2         | GC | MRT28     | GC | KIAA1094 | OMIM   |      |
| BIN1         | GC | CDH4      | GC | CDG1M    | OMIM   |      |
| SC5D         | GC | PPIAL4D   | GC | NTNG2    | OMIM   |      |
| PIGG         | GC | LINC00624 | GC | NEDBASH  | OMIM   |      |



|          |    |              |    |          |      |
|----------|----|--------------|----|----------|------|
| NAA10    | GC | MIR5087      | GC | GFI1B    | OMIM |
| PIK3C2A  | GC | ARMC4        | GC | BDPLT17  | OMIM |
| PITX1    | GC | ACSS1        | GC | GRIN1    | OMIM |
| LOXL1    | GC | GPC4         | GC | NMDAR1   | OMIM |
| CETP     | GC | FGR          | GC | NDHMSR   | OMIM |
| IAPP     | GC | TMEM37       | GC | NDHMSD   | OMIM |
| IL6R     | GC | MCF2         | GC | CACNA1B  | OMIM |
| VIM      | GC | MNT          | GC | CACNL1A5 | OMIM |
| TMEM132D | GC | WASF3        | GC | NEDNEH   | OMIM |
| SLC17A6  | GC | RAD21L1      | GC | HK1      | OMIM |
| PREP     | GC | PPP1R12A     | GC | HKD      | OMIM |
| VMA21    | GC | MAS1         | GC | HMSNR    | OMIM |
| SPRED1   | GC | GIP          | GC | RP79     | OMIM |
| PSMD4    | GC | DUX4         | GC | NEDVIBA  | OMIM |
| MMP14    | GC | DAND5        | GC | PLAU     | OMIM |
| TALDO1   | GC | PARD6G-AS1   | GC | URK      | OMIM |
| EPHX1    | GC | ST3GAL1      | GC | QPD      | OMIM |
| HMGCS2   | GC | LOC105274310 | GC | BDPLT5   | OMIM |
| SLCO1B1  | GC | KBTBD4       | GC | ZMIZ1    | OMIM |
| SLC6A20  | GC | XAGE3        | GC | RAI17    | OMIM |
| PHF21A   | GC | DEL10Q26     | GC | KIAA1224 | OMIM |
| PIGY     | GC | CTEPH1       | GC | ZIMP10   | OMIM |
| RHOBTB2  | GC | PEE2         | GC | NEDDFSFA | OMIM |
| UPF3B    | GC | PEE3         | GC | ADRB1    | OMIM |
| NPRL2    | GC | DEL16P13.2   | GC | ADRB1R   | OMIM |
| MIR107   | GC | MRT16        | GC | RHR      | OMIM |
| SNX3     | GC | MRT29        | GC | FNSS2    | OMIM |
| UBC      | GC | MRT30        | GC | DEAF1    | OMIM |
| FGFR4    | GC | MRT31        | GC | SPN      | OMIM |
| PCDH10   | GC | MRT33        | GC | ZMYND5   | OMIM |
| ATP5F1E  | GC | MRT35        | GC | MRD24    | OMIM |
| HTR6     | GC | DDAH2        | GC | FAR1     | OMIM |
| MECOM    | GC | SKA2         | GC | MLSTD2   | OMIM |
| GSTP1    | GC | ACAD8        | GC | PFCRD    | OMIM |
| MIR106A  | GC | DMXL2        | GC | SLC35C1  | OMIM |
| AARS1    | GC | RNASE2       | GC | FUCT1    | OMIM |
| CYP2E1   | GC | CCL1         | GC | CDG2C    | OMIM |
| DLG1     | GC | CXCL6        | GC | PEX16    | OMIM |
| FCGR2B   | GC | SLC30A3      | GC | PBD8A    | OMIM |
| KIFBP    | GC | EPHA6        | GC | PBD8B    | OMIM |
| RNASE3   | GC | NCKAP5       | GC | PHF21A   | OMIM |
| SCZD2    | GC | SCD          | GC | BHC80    | OMIM |
| WDTC1    | GC | P3H3         | GC | KIAA1696 | OMIM |
| CXCR3    | GC | MIR296       | GC | IDDBCS   | OMIM |

|         |    |              |    |         |      |
|---------|----|--------------|----|---------|------|
| CNR2    | GC | MTOR-AS1     | GC | TMX2    | OMIM |
| NOTCH4  | GC | ULK1         | GC | NEDMCMS | OMIM |
| TSPAN12 | GC | VDAC2        | GC | RASGRP2 | OMIM |
| NUP85   | GC | IL25         | GC | CDC25L  | OMIM |
| APOL4   | GC | SRRD         | GC | CABP4   | OMIM |
| PARK21  | GC | CYSLTR2      | GC | CRSD    | OMIM |
| CDH2    | GC | GPR108       | GC | CSNB2B  | OMIM |
| CHGA    | GC | ICA1         | GC | PAK1    | OMIM |
| ALPP    | GC | BMP7         | GC | IDDMSSD | OMIM |
| DBT     | GC | LOC100130587 | GC | ALG8    | OMIM |
| CYP7A1  | GC | ZNF470       | GC | CDG1H   | OMIM |
| HTR4    | GC | RBMS3        | GC | PCLD3   | OMIM |
| EPHB4   | GC | NT5C1B       | GC | MRE11A  | OMIM |
| NDUFS3  | GC | ZNF674       | GC | MRE11   | OMIM |
| PES1    | GC | SLC25A6      | GC | ATLD    | OMIM |
| TFEB    | GC | WWP1         | GC | GRIA4   | OMIM |
| AXIN2   | GC | FZD1         | GC | GLUR4   | OMIM |
| SREBF2  | GC | TMOD2        | GC | NEDSGA  | OMIM |
| POLR3B  | GC | DCLK2        | GC | ALKBH8  | OMIM |
| PLAGL1  | GC | GML          | GC | ABH8    | OMIM |
| CRHBP   | GC | YIPF7        | GC | MRT71   | OMIM |
| APOL2   | GC | GEMIN8       | GC | ALG9    | OMIM |
| CCKAR   | GC | HOXA4        | GC | DIBD1   | OMIM |
| CSF2RA  | GC | GTF3A        | GC | CDG1L   | OMIM |
| FTO     | GC | BTF3L4       | GC | GIKANIS | OMIM |
| FANCI   | GC | DHRS7C       | GC | DDX6    | OMIM |
| IGHE    | GC | LOC110121288 | GC | HLR2    | OMIM |
| SPAG1   | GC | HRH4         | GC | IDDILF  | OMIM |
| DNAJC3  | GC | MROH7        | GC | DPAGT1  | OMIM |
| NIPA2   | GC | HP1BP3       | GC | DPAGT2  | OMIM |
| PARK10  | GC | TMEM132E     | GC | DGPT    | OMIM |
| PARK16  | GC | SPINK1       | GC | CDG1J   | OMIM |
| IGFALS  | GC | SLC37A1      | GC | CMSTA2  | OMIM |
| CLTC    | GC | MXD1         | GC | CMS13   | OMIM |
| IKBKB   | GC | RRAS2        | GC | CBL     | OMIM |
| PARK12  | GC | ZNF526       | GC | CBL2    | OMIM |
| PTGS1   | GC | HPSE2        | GC | NSLL    | OMIM |
| ANG     | GC | FBXL5        | GC | STT3A   | OMIM |
| SCZD1   | GC | RBM25        | GC | ITM1    | OMIM |
| IFNB1   | GC | C4orf45      | GC | TMC     | OMIM |
| PPBP    | GC | LTA4H        | GC | FLI1    | OMIM |
| TEAD4   | GC | IL17D        | GC | BDPLT21 | OMIM |
| COL4A5  | GC | IGF2-AS      | GC | PEX5    | OMIM |
| AP4B1   | GC | DLC1         | GC | PXR1    | OMIM |

|          |    |              |    |          |      |
|----------|----|--------------|----|----------|------|
| ASTN2    | GC | BNIP3        | GC | PTS1R    | OMIM |
| IMPA2    | GC | PPID         | GC | PBD2A    | OMIM |
| CXCL12   | GC | CACNG3       | GC | PBD2B    | OMIM |
| GABRA6   | GC | PRKCE        | GC | RCDP5    | OMIM |
| DAD1     | GC | WNT5B        | GC | KRAS     | OMIM |
| STIL     | GC | VEZT         | GC | KRAS2    | OMIM |
| ATOH7    | GC | BRD3         | GC | RASK2    | OMIM |
| IRS4     | GC | PRDM5        | GC | NS       | OMIM |
| NCOR1    | GC | SRA1         | GC | CFC2     | OMIM |
| STAC3    | GC | PDCD10       | GC | RALD     | OMIM |
| FANCL    | GC | PPP1R3C      | GC | OES      | OMIM |
| PRKCA    | GC | SEC14L5      | GC | BHLHE41  | OMIM |
| UBXN2B   | GC | HEPHL1       | GC | BHLHB3   | OMIM |
| IKZF1    | GC | GPX2         | GC | SHARP1   | OMIM |
| NEUROD1  | GC | CDIP1        | GC | FNSS1    | OMIM |
| NPAS3    | GC | OR3A3        | GC | CNOT2    | OMIM |
| REV3L    | GC | POM121C      | GC | NOT2     | OMIM |
| ELP2     | GC | PDCL         | GC | IDNADFS  | OMIM |
| ISL1     | GC | TSPAN32      | GC | TPH2     | OMIM |
| WNT5A    | GC | SPIN4        | GC | NTPH     | OMIM |
| TRPV1    | GC | TKTL1        | GC | ADHD7    | OMIM |
| PPM1D    | GC | ATG14        | GC | CRY1     | OMIM |
| CHRFAM7A | GC | PAPPA2       | GC | PHLL1    | OMIM |
| SCZD3    | GC | NEUROG1      | GC | DSPD     | OMIM |
| MME      | GC | RAB3A        | GC | DHX37    | OMIM |
| HFM1     | GC | GLRX         | GC | KIAA1517 | OMIM |
| CCL3     | GC | CNTN5        | GC | NEDBAVC  | OMIM |
| KATNB1   | GC | PLB1         | GC | ADHD6    | OMIM |
| ADAMTSL1 | GC | SERTAD3      | GC | CDK8     | OMIM |
| TNFSF13B | GC | SYBU         | GC | IDDHBA   | OMIM |
| FECH     | GC | FZD8         | GC | COG6     | OMIM |
| TNFSF12  | GC | GHITM        | GC | COD2     | OMIM |
| MMP20    | GC | ATG7         | GC | KIAA1134 | OMIM |
| CAV1     | GC | WIZ          | GC | CDG2L    | OMIM |
| JUN      | GC | MEOX2        | GC | SHNS     | OMIM |
| CLP1     | GC | ENO3         | GC | ALG11    | OMIM |
| IFNA2    | GC | MACF1        | GC | KIAA1266 | OMIM |
| SV2A     | GC | LOC109461477 | GC | CDG1P    | OMIM |
| CHRNA6   | GC | IL31RA       | GC | PAND1    | OMIM |
| BMPR1A   | GC | KLK1         | GC | FBXL3    | OMIM |
| SCZD8    | GC | TRIM64       | GC | FBXL3A   | OMIM |
| PRDM8    | GC | RNR2         | GC | FBL3     | OMIM |
| DHFR     | GC | BRS3         | GC | IDDSFAS  | OMIM |
| PINK1-AS | GC | CCDC196      | GC | TRAPPC6B | OMIM |

|          |    |          |    |          |      |
|----------|----|----------|----|----------|------|
| SLC25A12 | GC | ASRGL1   | GC | TPC6     | OMIM |
| MIR199A1 | GC | CCDC154  | GC | NEDMEBA  | OMIM |
| DPYSL2   | GC | ALOX5AP  | GC | MGAT2    | OMIM |
| SCZD7    | GC | ZNF569   | GC | CDGS2    | OMIM |
| MB       | GC | PPIF     | GC | CDG2A    | OMIM |
| RPL18    | GC | ENPEP    | GC | FUT8     | OMIM |
| DHDDS    | GC | NISCH    | GC | CDGF1    | OMIM |
| SGO1     | GC | DUSP13   | GC | ACTN1    | OMIM |
| SOST     | GC | ESM1     | GC | BDPLT15  | OMIM |
| ITCH     | GC | LIPE     | GC | IRF2BPL  | OMIM |
| MAP2K5   | GC | KCNAB1   | GC | C14orf4  | OMIM |
| CXCL9    | GC | DNAJB13  | GC | EAP1     | OMIM |
| CLPX     | GC | ZBTB38   | GC | NEDAMSS  | OMIM |
| CEP135   | GC | ACVR2A   | GC | BCL11B   | OMIM |
| NAT2     | GC | RENBP    | GC | CTIP2    | OMIM |
| PANX1    | GC | MRGPRE   | GC | IMD49    | OMIM |
| PRKCB    | GC | MPDZ     | GC | IDDFSTA  | OMIM |
| CD69     | GC | SUPT4H1  | GC | CCNK     | OMIM |
| UBB      | GC | GEMIN2   | GC | IDDHDF   | OMIM |
| SCZD6    | GC | NEURL1   | GC | GNB5     | OMIM |
| KCND2    | GC | SEPTIN7  | GC | GB5      | OMIM |
| NLRP7    | GC | PPP2R3C  | GC | IDDCA    | OMIM |
| ERF      | GC | TRAIP    | GC | LADCI    | OMIM |
| PDE4A    | GC | EXOC3L2  | GC | RORA     | OMIM |
| GATA2    | GC | TOP1     | GC | IDDECA   | OMIM |
| SERPINA7 | GC | CHTF18   | GC | MPI      | OMIM |
| GSC      | GC | RPS6KA5  | GC | PMI1     | OMIM |
| RELA     | GC | NUP42    | GC | CDG1B    | OMIM |
| MMP3     | GC | UQCRC2   | GC | SCAPER   | OMIM |
| TGM2     | GC | PCBP4    | GC | KIAA1454 | OMIM |
| GABRA4   | GC | GTF2IRD2 | GC | IDDRP    | OMIM |
| FABP7    | GC | KIF4A    | GC | MTHFS    | OMIM |
| EFEMP1   | GC | BLVRB    | GC | NEDMEHM  | OMIM |
| SCZD10   | GC | NEK11    | GC | ADHD1    | OMIM |
| YWHAQ    | GC | MOB2     | GC | MAPK8IP3 | OMIM |
| NRG3     | GC | CLEC4E   | GC | SYD2     | OMIM |
| MIR212   | GC | SPNS1    | GC | JSAP1    | OMIM |
| ITGB4    | GC | DUSP11   | GC | JIP3     | OMIM |
| HPS4     | GC | GIPR     | GC | NEDBA    | OMIM |
| ANXA11   | GC | CCN1     | GC | ALG1     | OMIM |
| PIP5K1C  | GC | SKAP2    | GC | HMAT1    | OMIM |
| ACKR1    | GC | SF3B6    | GC | HMT1 C   | OMIM |
| CHST11   | GC | NAV2     | GC | DG1K     | OMIM |
| MSR1     | GC | LILRA4   | GC | PMM2     | OMIM |

---

|         |    |              |    |          |      |
|---------|----|--------------|----|----------|------|
| HPS5    | GC | IRX6         | GC | CDG1A    | OMIM |
| MIR15B  | GC | RSPRY1       | GC | GRIN2A   | OMIM |
| MIR197  | GC | CTSE         | GC | NMDAR2A  | OMIM |
| LRPPRC  | GC | TNKS2        | GC | FESD     | OMIM |
| PIGO    | GC | ORMDL3       | GC | LKS      | OMIM |
| SET     | GC | PLP2         | GC | MAFD4    | OMIM |
| MT-TS1  | GC | LIMK2        | GC | COG7     | OMIM |
| NTNG2   | GC | FUT9         | GC | CDG2E    | OMIM |
| PTGIS   | GC | COL19A1      | GC | GNAO1    | OMIM |
| SLC52A1 | GC | LOC108228208 | GC | EIEE17   | OMIM |
| HTN3    | GC | LOC108228209 | GC | NEDIM    | OMIM |
| NTRK3   | GC | PRKD1        | GC | COG8     | OMIM |
| MBD4    | GC | BCL6         | GC | DOR1     | OMIM |
| CASP9   | GC | INTS1        | GC | CDG2H    | OMIM |
| CCL17   | GC | NUP210       | GC | FCSK     | OMIM |
| DGKH    | GC | CLEC6A       | GC | FUK      | OMIM |
| TRANK1  | GC | C14orf178    | GC | CDGF2    | OMIM |
| SUGCT   | GC | MACROH2A1    | GC | COG4     | OMIM |
| APOD    | GC | ADAM23       | GC | COD1     | OMIM |
| TPMT    | GC | AHSA1        | GC | CDG2J    | OMIM |
| AFP     | GC | SLC29A1      | GC | SWILS    | OMIM |
| ZNF462  | GC | ICMT         | GC | NDNC7    | OMIM |
| MIR198  | GC | LNPB         | GC | GEMIN4   | OMIM |
| DLGAP3  | GC | MYO9B        | GC | NEDMCR   | OMIM |
| COL9A1  | GC | DBI          | GC | POLR2A   | OMIM |
| MT-TW   | GC | MYB          | GC | RPOL2    | OMIM |
| SLC9A1  | GC | SULT1A1      | GC | NEDHIB   | OMIM |
| TBC1D7  | GC | ST3GAL6      | GC | MPDU1    | OMIM |
| ERVW-1  | GC | CACNA2D1-AS1 | GC | SL15     | OMIM |
| GNAQ    | GC | SOX14        | GC | CDGIF    | OMIM |
| SETD1A  | GC | MTUS2        | GC | KDM6B    | OMIM |
| HLA-C   | GC | FGFRL1       | GC | JMJD3    | OMIM |
| SLC6A14 | GC | THBS2        | GC | KIAA0346 | OMIM |
| PSMNSW  | GC | SLC37A3      | GC | NEDCFSA  | OMIM |
| TOR3A   | GC | VWC2         | GC | VAMP2    | OMIM |
| PAX4    | GC | SCNM1        | GC | SYB2     | OMIM |
| NQO1    | GC | DPYD-AS2     | GC | NEDHAHM  | OMIM |
| CHIT1   | GC | ASAP1        | GC | ADHD2    | OMIM |
| ACTL6B  | GC | CAPRIN1      | GC | TMEM199  | OMIM |
| SHANK1  | GC | C11orf21     | GC | VMA12    | OMIM |
| HDAC6   | GC | LY6E         | GC | VPH2     | OMIM |
| SLC16A1 | GC | RFK          | GC | C17orf32 | OMIM |
| MGR6    | GC | MXD4         | GC | CDG2P    | OMIM |
| RAB5A   | GC | CHTF8        | GC | SLC6A4   | OMIM |

---

---

|         |    |            |    |          |      |
|---------|----|------------|----|----------|------|
| AHCY    | GC | CLDN3      | GC | HTT      | OMIM |
| GAST    | GC | ZDBF2      | GC | OCD1     | OMIM |
| PEMT    | GC | GPR1-AS    | GC | SLFN14   | OMIM |
| ASPRV1  | GC | LINC01090  | GC | BDPLT20  | OMIM |
| AVIL    | GC | ITLN1      | GC | PEX12    | OMIM |
| SP4     | GC | CBLL1      | GC | PBD3A    | OMIM |
| GFRA1   | GC | NEK3       | GC | ITGA2B   | OMIM |
| FAM3D   | GC | COPE       | GC | GP2B     | OMIM |
| TBX4    | GC | FDXR       | GC | CD41B    | OMIM |
| RARA    | GC | SLC29A2    | GC | GT       | OMIM |
| PAK3    | GC | C9orf50    | GC | BDPLT2   | OMIM |
| PON3    | GC | GTF2IRD2B  | GC | ITGB3    | OMIM |
| HTR5A   | GC | DEFB103B   | GC | GP3A     | OMIM |
| TLR3    | GC | PAICS      | GC | MED13    | OMIM |
| LGI4    | GC | RBM45      | GC | THRAP1   | OMIM |
| MALAT1  | GC | ADGRG6     | GC | TRAP240  | OMIM |
| CDKN3   | GC | ALG10B     | GC | MRD61    | OMIM |
| WNT3A   | GC | ADCY9      | GC | BPTF     | OMIM |
| WASF2   | GC | CGB5       | GC | FALZ     | OMIM |
| HMGA2   | GC | REC8       | GC | FAC1     | OMIM |
| IL10RB  | GC | TRIM74     | GC | NURF301  | OMIM |
| BOLA3   | GC | ABHD11-AS1 | GC | NEDDFL   | OMIM |
| KCNQ5   | GC | TSIX       | GC | NDNC9    | OMIM |
| LGALS3  | GC | PRIMPOL    | GC | COG1     | OMIM |
| GRK3    | GC | CADPS      | GC | LDLB     | OMIM |
| MIR30A  | GC | NCR3       | GC | KIAA1381 | OMIM |
| CCL4    | GC | DAGLA      | GC | CDG2G    | OMIM |
| IER3IP1 | GC | PCYOX1     | GC | TMEM94   | OMIM |
| LRP8    | GC | GTF2IRD2P1 | GC | KIAA0195 | OMIM |
| PIP4K2A | GC | PKNOX2     | GC | IDDCDF   | OMIM |
| AXIN1   | GC | MED7       | GC | RAC3     | OMIM |
| PGF     | GC | ICAM2      | GC | CSNK1D   | OMIM |
| TAF15   | GC | NSUN3      | GC | ASPS     | OMIM |
| GPAA1   | GC | WLS        | GC | FASPS2   | OMIM |
| CLEC7A  | GC | DNAJC24    | GC | WDR45B   | OMIM |
| TLR6    | GC | NSUN5P2    | GC | WIPI3    | OMIM |
| MGR5    | GC | NSUN5P1    | GC | WDR45L   | OMIM |
| TXN     | GC | CMS1A1     | GC | NEDSBAS  | OMIM |
| IGFBP2  | GC | IGH        | GC | MAFD1    | OMIM |
| DSCAM   | GC | SPTLC3     | GC | BPAD     | OMIM |
| SLC6A17 | GC | ATE1       | GC | MD1      | OMIM |
| BDNF-AS | GC | CDC123     | GC | OHDS     | OMIM |
| KPTN    | GC | CAMSAP2    | GC | TBXA2R   | OMIM |
| TYMS    | GC | ERAP2      | GC | BDPLT13  | OMIM |

---

|          |     |          |          |         |      |
|----------|-----|----------|----------|---------|------|
| VCAN     | GC  | ELF3     | GC       | RAB11B  | OMIM |
| BEST1    | GC  | MED31    | GC       | NDAGSCW | OMIM |
| CD80     | GC  | TRIM50   | GC       | DHPS    | OMIM |
| STAT6    | GC  | SPDYE1   | GC       | NEDSSWI | OMIM |
| ITGA3    | GC  | PROB1    | GC       | NACC1   | OMIM |
| TMEM230  | GC  | TMEM270  | GC       | BTBD14B | OMIM |
| TCTEX1D2 | GC  | GTF2IP1  | GC       | NECFM   | OMIM |
| RPE65    | GC  | MT-TD    | GC       | SPTBN4  | OMIM |
| NDEL1    | GC  | GTF2IP4  | GC       | QV      | OMIM |
| ACTN1    | GC  | WBSCR2   | GC       | NEDHND  | OMIM |
| YWHAE    | GC  | SNORD133 | GC       | CMND    | OMIM |
| CRB2     | GC  | WBSCR23  | GC       | CNOT3   | OMIM |
| CARD9    | GC  | PDS5B    | GC       | NOT3    | OMIM |
| RPL35    | GC  | IL21     | GC       | IDDSADF | OMIM |
| FTH1     | GC  | NUDC     | GC       | GP6     | OMIM |
| JPH1     | GC  | NCOA1    | GC       | GPIV    | OMIM |
| NAGK     | GC  | NPY5R    | DrugBank | BDPLT11 | OMIM |
| H3R      | TTD |          |          |         |      |

GC: the GeneCards Database; OMIM: the Online Mendelian Inheritance in Man; TTD: the Therapeutic Target Database

**Supplementary Table S5. Compound-Target Network information for BXHP**

| <b>Name</b>                                                  | <b>Type</b> | <b>Degree</b> | <b>Betweenness Centrality</b> |
|--------------------------------------------------------------|-------------|---------------|-------------------------------|
| kaempferol                                                   | mol         | 47            | 0.376658                      |
| luteolin                                                     | mol         | 40            | 0.329407                      |
| beta-sitosterol                                              | mol         | 25            | 0.147799                      |
| Stigmasterol                                                 | mol         | 24            | 0.180146                      |
| baicalein                                                    | mol         | 23            | 0.162184                      |
| Cavidine                                                     | mol         | 19            | 0.119031                      |
| coniferin                                                    | mol         | 14            | 0.058167                      |
| morin                                                        | mol         | 10            | 0.066690                      |
| delphinidin                                                  | mol         | 5             | 0.003864                      |
| (3S,6S)-3-(benzyl)-6-(4-hydroxybenzyl)piperazine-2,5-quinone | mol         | 3             | 0.001202                      |
| Spinasterol                                                  | mol         | 3             | 0.004765                      |
| 24-Ethylcholest-4-en-3-one                                   | mol         | 2             | 0.000910                      |
| gondoic acid                                                 | mol         | 2             | 0.000184                      |
| 10,13-eicosadienoic                                          | mol         | 2             | 0.000184                      |
| Vulgaxanthin-I                                               | mol         | 2             | 0.000742                      |
| poriferasterol monoglucoside_qt                              | mol         | 2             | 0.000381                      |
| stigmast-7-enol                                              | mol         | 2             | 0.000381                      |
| Cycloartenol                                                 | mol         | 1             | 0.000000                      |
| beta-D-Ribofuranoside, xanthine-9                            | mol         | 1             | 0.000000                      |
| Prostaglandin G/H synthase 2                                 | gene        | 12            | 0.147901                      |
| Nuclear receptor coactivator 2                               | gene        | 12            | 0.106607                      |
| Prostaglandin G/H synthase 1                                 | gene        | 10            | 0.115612                      |
| Progesterone receptor                                        | gene        | 7             | 0.035114                      |
| Androgen receptor                                            | gene        | 7             | 0.038088                      |
| Muscarinic acetylcholine receptor M1                         | gene        | 5             | 0.022507                      |
| Alpha-1B adrenergic receptor                                 | gene        | 5             | 0.022507                      |
| Beta-2 adrenergic receptor                                   | gene        | 5             | 0.009015                      |
| Peroxisome proliferator activated receptor gamma             | gene        | 5             | 0.018752                      |
| Mineralocorticoid receptor                                   | gene        | 4             | 0.018119                      |
| Muscarinic acetylcholine receptor M3                         | gene        | 4             | 0.006350                      |
| Sodium channel protein type 5 subunit alpha                  | gene        | 4             | 0.006350                      |
| Caspase-3                                                    | gene        | 4             | 0.021443                      |
| Mu-type opioid receptor                                      | gene        | 3             | 0.002425                      |
| Trypsin-1                                                    | gene        | 3             | 0.010638                      |
| Nuclear receptor coactivator 1                               | gene        | 3             | 0.007724                      |
| Transcription factor p65                                     | gene        | 3             | 0.010638                      |
| RAC-alpha serine/threonine-protein kinase                    | gene        | 3             | 0.010638                      |
| Apoptosis regulator Bcl-2                                    | gene        | 3             | 0.008683                      |
| Apoptosis regulator BAX                                      | gene        | 3             | 0.008683                      |
| Muscarinic acetylcholine receptor M2                         | gene        | 3             | 0.008647                      |



|                                                                   |      |   |          |
|-------------------------------------------------------------------|------|---|----------|
| Gamma-aminobutyric acid receptor subunit alpha-1                  | gene | 3 | 0.008647 |
| Transcription factor AP-1                                         | gene | 3 | 0.012077 |
| Nitric oxide synthase, inducible                                  | gene | 3 | 0.002778 |
| Potassium voltage-gated channel subfamily H member 2              | gene | 2 | 0.001164 |
| ADRB1                                                             | gene | 2 | 0.001889 |
| Alpha-1D adrenergic receptor                                      | gene | 2 | 0.000609 |
| Sodium-dependent serotonin transporter                            | gene | 2 | 0.001164 |
| Coagulation factor VII                                            | gene | 2 | 0.006212 |
| Vascular endothelial growth factor A                              | gene | 2 | 0.003345 |
| Matrix metalloproteinase-9                                        | gene | 2 | 0.003345 |
| Aryl hydrocarbon receptor                                         | gene | 2 | 0.003278 |
| Alpha-1A adrenergic receptor                                      | gene | 2 | 0.001178 |
| Caspase-9                                                         | gene | 2 | 0.005400 |
| Sodium-dependent noradrenaline transporter                        | gene | 2 | 0.004807 |
| Tumor necrosis factor                                             | gene | 2 | 0.004015 |
| Interstitial collagenase                                          | gene | 2 | 0.004015 |
| Heme oxygenase 1                                                  | gene | 2 | 0.004015 |
| Intercellular adhesion molecule 1                                 | gene | 2 | 0.004015 |
| Arachidonate 5-lipoxygenase                                       | gene | 2 | 0.003709 |
| Glutathione S-transferase P                                       | gene | 2 | 0.004015 |
| Solute carrier family 2, facilitated glucose transporter member 4 | gene | 2 | 0.004015 |
| Insulin receptor                                                  | gene | 2 | 0.004015 |
| DNA topoisomerase 1                                               | gene | 2 | 0.003353 |
| Muscarinic acetylcholine receptor M5                              | gene | 1 | 0.000000 |
| 5-hydroxytryptamine receptor 3A                                   | gene | 1 | 0.000000 |
| Alpha-2C adrenergic receptor                                      | gene | 1 | 0.000000 |
| Delta-type opioid receptor                                        | gene | 1 | 0.000000 |
| Retinoic acid receptor RXR-beta                                   | gene | 1 | 0.000000 |
| cAMP and cAMP-inhibited cGMP 3',5'-cyclic phosphodiesterase 10A   | gene | 1 | 0.000000 |
| Proto-oncogene c-Fos                                              | gene | 1 | 0.000000 |
| Hypoxia-inducible factor 1-alpha                                  | gene | 1 | 0.000000 |
| Myeloperoxidase                                                   | gene | 1 | 0.000000 |
| Insulin-like growth factor II                                     | gene | 1 | 0.000000 |
| Cytochrome c                                                      | gene | 1 | 0.000000 |
| Arachidonate 12-lipoxygenase, 12S-type                            | gene | 1 | 0.000000 |
| Nuclear factor of activated T-cells, cytoplasmic 1                | gene | 1 | 0.000000 |
| NADPH oxidase 5                                                   | gene | 1 | 0.000000 |
| Apolipoprotein D                                                  | gene | 1 | 0.000000 |
| Neuronal acetylcholine receptor subunit alpha-2                   | gene | 1 | 0.000000 |
| Caspase-8                                                         | gene | 1 | 0.000000 |
| Protein kinase C alpha type                                       | gene | 1 | 0.000000 |

|                                                                         |      |   |          |
|-------------------------------------------------------------------------|------|---|----------|
| Serum paraoxonase/arylesterase 1                                        | gene | 1 | 0.000000 |
| Microtubule-associated protein 2                                        | gene | 1 | 0.000000 |
| Alcohol dehydrogenase 1C                                                | gene | 1 | 0.000000 |
| Alpha-2A adrenergic receptor                                            | gene | 1 | 0.000000 |
| Sodium-dependent dopamine transporter                                   | gene | 1 | 0.000000 |
| Aldose reductase                                                        | gene | 1 | 0.000000 |
| Urokinase-type plasminogen activator                                    | gene | 1 | 0.000000 |
| Leukotriene A-4 hydrolase                                               | gene | 1 | 0.000000 |
| Amine oxidase [flavin-containing] B                                     | gene | 1 | 0.000000 |
| Amine oxidase [flavin-containing] A                                     | gene | 1 | 0.000000 |
| Estrogen receptor                                                       | gene | 1 | 0.000000 |
| Cyclin-A2                                                               | gene | 1 | 0.000000 |
| Acetylcholinesterase                                                    | gene | 1 | 0.000000 |
| Inhibitor of nuclear factor kappa-B kinase subunit beta                 | gene | 1 | 0.000000 |
| Activator of 90 kDa heat shock protein ATPase homolog 1                 | gene | 1 | 0.000000 |
| Mitogen-activated protein kinase 8                                      | gene | 1 | 0.000000 |
| Signal transducer and activator of transcription 1-alpha/beta           | gene | 1 | 0.000000 |
| Cytochrome P450 3A4                                                     | gene | 1 | 0.000000 |
| Cytochrome P450 1A2                                                     | gene | 1 | 0.000000 |
| Cytochrome P450 1A1                                                     | gene | 1 | 0.000000 |
| e-selectin                                                              | gene | 1 | 0.000000 |
| Vascular cell adhesion protein 1                                        | gene | 1 | 0.000000 |
| Nuclear receptor subfamily 1 group I member 2                           | gene | 1 | 0.000000 |
| Cytochrome P450 1B1                                                     | gene | 1 | 0.000000 |
| Hyaluronan synthase 2                                                   | gene | 1 | 0.000000 |
| 26S proteasome non-ATPase regulatory subunit 3                          | gene | 1 | 0.000000 |
| Nuclear receptor subfamily 1 group I member 3                           | gene | 1 | 0.000000 |
| Serine/threonine-protein phosphatase 2B catalytic subunit alpha isoform | gene | 1 | 0.000000 |
| Glutathione S-transferase Mu 1                                          | gene | 1 | 0.000000 |
| Epidermal growth factor receptor                                        | gene | 1 | 0.000000 |
| Bcl-2-like protein 1                                                    | gene | 1 | 0.000000 |
| Cyclin-dependent kinase inhibitor 1                                     | gene | 1 | 0.000000 |
| 72 kDa type IV collagenase                                              | gene | 1 | 0.000000 |
| Mitogen-activated protein kinase 1                                      | gene | 1 | 0.000000 |
| Interleukin-10                                                          | gene | 1 | 0.000000 |
| Retinoblastoma-associated protein                                       | gene | 1 | 0.000000 |
| Interleukin-6                                                           | gene | 1 | 0.000000 |
| E3 ubiquitin-protein ligase Mdm2                                        | gene | 1 | 0.000000 |
| Amyloid beta A4 protein                                                 | gene | 1 | 0.000000 |
| Induced myeloid leukemia cell differentiation protein Mcl-1             | gene | 1 | 0.000000 |

---

|                                             |      |   |          |
|---------------------------------------------|------|---|----------|
| Baculoviral IAP repeat-containing protein 5 | gene | 1 | 0.000000 |
| Interleukin-2                               | gene | 1 | 0.000000 |
| Tyrosinase                                  | gene | 1 | 0.000000 |
| Interferon gamma                            | gene | 1 | 0.000000 |
| Interleukin-4                               | gene | 1 | 0.000000 |
| CD40 ligand                                 | gene | 1 | 0.000000 |
| Adenylate cyclase type 2                    | gene | 1 | 0.000000 |
| Hepatocyte growth factor receptor           | gene | 1 | 0.000000 |
| Endothelin-1                                | gene | 1 | 0.000000 |
| Multidrug resistance protein 1              | gene | 1 | 0.000000 |
| Platelet glycoprotein 4                     | gene | 1 | 0.000000 |
| Glutathione reductase, mitochondrial        | gene | 1 | 0.000000 |

---

**Supplementary Table S6. The core PPI network for 34 Core Candidate BXHP Targets**

| <b>Target</b> | <b>Degree<br/>(DC)</b> | <b>LAC</b> | <b>Eigenvector<br/>(EC)</b> | <b>Betweenness<br/>(BC)</b> | <b>Closeness<br/>(CC)</b> | <b>Network<br/>(NC)</b> |
|---------------|------------------------|------------|-----------------------------|-----------------------------|---------------------------|-------------------------|
| AKT1          | 71                     | 24.197184  | 0.2037491                   | 1204.3031                   | 0.7151899                 | 60.473476               |
| IL6           | 64                     | 25.15625   | 0.19558994                  | 896.1162                    | 0.6890244                 | 51.934406               |
| VEGFA         | 60                     | 26.633333  | 0.19526711                  | 439.6876                    | 0.6608187                 | 52.233864               |
| JUN           | 60                     | 26.7       | 0.19547728                  | 462.44553                   | 0.6608187                 | 51.671867               |
| CASP3         | 57                     | 26.070175  | 0.18780428                  | 540.6267                    | 0.65317917                | 46.826435               |
| FOS           | 56                     | 23.357143  | 0.17146671                  | 882.6748                    | 0.65317917                | 41.194527               |
| PTGS2         | 54                     | 26.37037   | 0.18284132                  | 416.53726                   | 0.6348315                 | 45.540604               |
| MAPK8         | 54                     | 27.555555  | 0.18801345                  | 209.65298                   | 0.6348315                 | 45.5019                 |
| MAPK1         | 53                     | 26.37736   | 0.18181162                  | 242.86472                   | 0.6312849                 | 43.62528                |
| EGFR          | 52                     | 24.884615  | 0.17430517                  | 388.63925                   | 0.64204544                | 41.179848               |
| MMP9          | 47                     | 27.276596  | 0.17246202                  | 256.82117                   | 0.6042781                 | 39.87058                |
| ESR1          | 44                     | 23.136364  | 0.14979742                  | 228.85316                   | 0.6042781                 | 33.526962               |
| CYCS          | 44                     | 22.454546  | 0.1521999                   | 188.10568                   | 0.60106385                | 32.465523               |
| PPARG         | 41                     | 20.780487  | 0.13966197                  | 229.38957                   | 0.591623                  | 28.636946               |
| RELA          | 40                     | 25         | 0.15296479                  | 161.15675                   | 0.5885417                 | 30.698633               |
| IL10          | 40                     | 26.75      | 0.15591635                  | 61.88223                    | 0.58247423                | 33.459766               |
| BCL2L1        | 40                     | 25.85      | 0.15364026                  | 61.90998                    | 0.58247423                | 32.838665               |
| MMP2          | 39                     | 25.589743  | 0.152548                    | 75.881134                   | 0.57360405                | 31.331295               |
| HMOX1         | 39                     | 22.923077  | 0.14345294                  | 118.42971                   | 0.58247423                | 28.552681               |
| APP           | 38                     | 13.842105  | 0.10482103                  | 705.5535                    | 0.5885417                 | 22.000998               |
| IL4           | 37                     | 23.72973   | 0.13989754                  | 172.71529                   | 0.57360405                | 28.463701               |
| CASP8         | 37                     | 24.972973  | 0.14504218                  | 48.84611                    | 0.5707071                 | 30.394432               |
| AR            | 37                     | 20.486486  | 0.13001317                  | 155.2597                    | 0.57653064                | 26.726683               |
| IL2           | 35                     | 24         | 0.13826314                  | 47.942364                   | 0.56218904                | 28.153973               |
| STAT1         | 34                     | 23.647058  | 0.13643731                  | 65.17049                    | 0.5594059                 | 26.741438               |
| HIF1A         | 34                     | 21.470589  | 0.13097338                  | 87.08679                    | 0.5566502                 | 25.206003               |
| CDKN1A        | 33                     | 22.484848  | 0.1283113                   | 65.7505                     | 0.5485437                 | 26.94772                |
| MPO           | 32                     | 19.625     | 0.11585885                  | 123.632225                  | 0.5594059                 | 23.912392               |
| AHR           | 32                     | 16.4375    | 0.10633193                  | 164.21674                   | 0.5432692                 | 20.806871               |
| PGR           | 29                     | 17.655172  | 0.10641885                  | 61.478817                   | 0.5512195                 | 20.787596               |
| MMP1          | 28                     | 20.785715  | 0.11575514                  | 54.67552                    | 0.5432692                 | 22.623016               |
| ABCB1         | 25                     | 11.28      | 0.07418045                  | 147.25879                   | 0.5458937                 | 14.586952               |
| PLAU          | 21                     | 13.619047  | 0.08337217                  | 62.776352                   | 0.51834863                | 15.349145               |
| GSTP1         | 21                     | 10.380953  | 0.061818644                 | 155.68744                   | 0.509009                  | 12.414377               |

**Supplementary Table S7. GO Enrichment Analysis for 34 Core Candidate BXHP Targets**

| <b>Category</b>    | <b>Term</b>                                            | <b>Count</b> | <b>PValue</b>          | <b>Rich Factor</b>     |
|--------------------|--------------------------------------------------------|--------------|------------------------|------------------------|
| Biological process | regulation of apoptosis                                | 24           | $2.40 \times 10^{-21}$ | $3.93 \times 10^{-18}$ |
|                    | regulation of programmed cell death                    | 24           | $3.01 \times 10^{-21}$ | $4.92 \times 10^{-18}$ |
|                    | regulation of cell death                               | 24           | $3.27 \times 10^{-21}$ | $5.35 \times 10^{-18}$ |
|                    | regulation of cell proliferation                       | 19           | $2.18 \times 10^{-14}$ | $3.58 \times 10^{-11}$ |
|                    | response to organic substance                          | 18           | $9.82 \times 10^{-14}$ | $1.61 \times 10^{-10}$ |
|                    | regulation of transcription                            | 18           | $3.15 \times 10^{-5}$  | $5.16 \times 10^{-2}$  |
|                    | positive regulation of cellular biosynthetic process   | 17           | $8.19 \times 10^{-13}$ | $1.34 \times 10^{-9}$  |
|                    | positive regulation of biosynthetic process            | 17           | $1.02 \times 10^{-12}$ | $1.67 \times 10^{-9}$  |
|                    | positive regulation of macromolecule metabolic process | 17           | $2.47 \times 10^{-11}$ | $4.04 \times 10^{-8}$  |
|                    | regulation of transcription, DNA-dependent             | 17           | $9.14 \times 10^{-7}$  | $1.50 \times 10^{-3}$  |
| Cell component     | organelle lumen                                        | 16           | $3.54 \times 10^{-6}$  | $4.25 \times 10^{-3}$  |
|                    | membrane--enclosed lumen                               | 16           | $4.54 \times 10^{-6}$  | $5.45 \times 10^{-3}$  |
|                    | intracellular organelle lumen                          | 14           | $8.32 \times 10^{-5}$  | $9.98 \times 10^{-2}$  |
|                    | extracellular region                                   | 13           | $1.19 \times 10^{-3}$  | 1.42                   |
|                    | cytosol                                                | 12           | $1.25 \times 10^{-4}$  | $1.50 \times 10^{-1}$  |
|                    | nuclear lumen                                          | 12           | $2.71 \times 10^{-4}$  | $3.24 \times 10^{-1}$  |
|                    | extracellular region part                              | 11           | $4.08 \times 10^{-5}$  | $4.90 \times 10^{-2}$  |
|                    | extracellular space                                    | 10           | $1.79 \times 10^{-5}$  | $2.15 \times 10^{-2}$  |
|                    | nucleoplasm                                            | 9            | $7.43 \times 10^{-4}$  | $8.88 \times 10^{-1}$  |
|                    | cell projection                                        | 7            | $4.96 \times 10^{-3}$  | 5.79                   |
| Molecular Function | transition metal ion binding                           | 13           | $3.57 \times 10^{-2}$  | $3.63 \times 10$       |
|                    | DNA binding                                            | 12           | $2.48 \times 10^{-2}$  | $2.67 \times 10$       |
|                    | transcription factor activity                          | 10           | $5.44 \times 10^{-4}$  | $6.71 \times 10^{-1}$  |
|                    | transcription regulator activity                       | 10           | $1.10 \times 10^{-2}$  | $1.28 \times 10$       |
|                    | sequence--specific DNA binding                         | 9            | $1.07 \times 10^{-4}$  | $1.33 \times 10^{-1}$  |
|                    | protein dimerization activity                          | 8            | $3.52 \times 10^{-4}$  | $4.35 \times 10^{-1}$  |
|                    | lipid binding                                          | 7            | $8.38 \times 10^{-4}$  | 1.03                   |
|                    | peptidase activity                                     | 7            | $2.90 \times 10^{-3}$  | 3.54                   |
|                    | identical protein binding                              | 7            | $4.97 \times 10^{-3}$  | 5.98                   |
|                    | endopeptidase activity                                 | 6            | $2.39 \times 10^{-3}$  | 2.91                   |

**Supplementary Table S8. Pathway Enrichment Analysis for 34 Core Candidate BXHP Targets**

| <b>Number</b> | <b>Term</b>                                                   | <b>Count</b> | <b>PValue</b>          | <b>Rich Factor</b>     |
|---------------|---------------------------------------------------------------|--------------|------------------------|------------------------|
| hsa05200      | Pathways in cancer                                            | 23           | $1.17 \times 10^{-20}$ | $1.24 \times 10^{-17}$ |
| hsa04080      | Toll-like receptor signaling pathway                          | 9            | $7.48 \times 10^{-8}$  | $7.95 \times 10^{-5}$  |
| hsa04020      | Pancreatic cancer                                             | 8            | $1.33 \times 10^{-7}$  | $1.42 \times 10^{-4}$  |
| hsa05210      | Colorectal cancer                                             | 8            | $3.90 \times 10^{-7}$  | $4.15 \times 10^{-4}$  |
| hsa05215      | T cell receptor signaling pathway                             | 8            | $2.18 \times 10^{-6}$  | $2.32 \times 10^{-3}$  |
| hsa04660      | MAPK signaling pathway                                        | 8            | $7.29 \times 10^{-4}$  | $7.73 \times 10^{-1}$  |
| hsa05212      | Bladder cancer                                                | 7            | $1.12 \times 10^{-7}$  | $1.19 \times 10^{-4}$  |
| hsa05222      | Prostate cancer                                               | 7            | $1.03 \times 10^{-5}$  | $1.09 \times 10^{-2}$  |
| hsa04210      | Jak-STAT signaling pathway                                    | 7            | $2.36 \times 10^{-4}$  | $2.50 \times 10^{-1}$  |
| hsa04010      | Apoptosis                                                     | 6            | $1.33 \times 10^{-4}$  | $1.41 \times 10^{-1}$  |
| hsa04012      | ErbB signaling pathway                                        | 6            | $1.33 \times 10^{-4}$  | $1.41 \times 10^{-1}$  |
| hsa04510      | Focal adhesion                                                | 6            | $5.84 \times 10^{-3}$  | 6.03                   |
| hsa04060      | Cytokine-cytokine receptor interaction                        | 6            | $1.73 \times 10^{-2}$  | $1.69 \times 10^0$     |
| hsa04621      | NOD-like receptor signaling pathway                           | 5            | $4.33 \times 10^{-4}$  | $4.60 \times 10^{-1}$  |
| hsa05120      | Epithelial cell signaling in<br>Helicobacter pylori infection | 5            | $6.17 \times 10^{-4}$  | $6.54 \times 10^{-1}$  |
| hsa05211      | Renal cell carcinoma                                          | 5            | $6.89 \times 10^{-4}$  | $7.30 \times 10^{-1}$  |
| hsa05220      | Chronic myeloid leukemia                                      | 5            | $8.95 \times 10^{-4}$  | $9.47 \times 10^{-1}$  |
| hsa04662      | B cell receptor signaling pathway                             | 5            | $8.95 \times 10^{-4}$  | $9.47 \times 10^{-1}$  |
| hsa05222      | Small cell lung cancer                                        | 5            | $1.37 \times 10^{-3}$  | 1.45                   |
| hsa04912      | GnRH signaling pathway                                        | 5            | $2.42 \times 10^{-3}$  | 2.54                   |
| hsa04722      | Neurotrophin signaling pathway                                | 5            | $5.65 \times 10^{-3}$  | 5.85                   |
| hsa05010      | Alzheimer's disease                                           | 5            | $1.46 \times 10^{-2}$  | $1.44 \times 10^0$     |
| hsa04672      | Intestinal immune network for IgA<br>production               | 4            | $2.84 \times 10^{-3}$  | 2.98                   |
| hsa04150      | mTOR signaling pathway                                        | 4            | $3.37 \times 10^{-3}$  | 3.53                   |
| hsa05214      | Glioma                                                        | 4            | $5.80 \times 10^{-3}$  | 5.99                   |
| hsa04115      | p53 signaling pathway                                         | 4            | $7.17 \times 10^{-3}$  | 7.37                   |
| hsa05218      | Melanoma                                                      | 4            | $8.09 \times 10^{-3}$  | 8.27                   |
| hsa04370      | VEGF signaling pathway                                        | 4            | $9.40 \times 10^{-3}$  | 9.55                   |
| hsa04664      | Fc epsilon RI signaling pathway                               | 4            | $1.05 \times 10^{-2}$  | $1.06 \times 10^0$     |
| hsa04914      | Progesterone-mediated oocyte<br>maturation                    | 4            | $1.36 \times 10^{-2}$  | $1.36 \times 10^0$     |
| hsa05330      | Allograft rejection                                           | 3            | $1.87 \times 10^{-2}$  | $1.82 \times 10^0$     |
| hsa05320      | Autoimmune thyroid disease                                    | 3            | $3.59 \times 10^{-2}$  | $3.22 \times 10^0$     |
| hsa05213      | Endometrial cancer                                            | 3            | $3.72 \times 10^{-2}$  | $3.31 \times 10^0$     |
| hsa05014      | Amyotrophic lateral sclerosis (ALS)                           | 3            | $3.85 \times 10^{-2}$  | $3.41 \times 10^0$     |
| hsa05223      | Non-small cell lung cancer                                    | 3            | $3.98 \times 10^{-2}$  | $3.51 \times 10^0$     |
| hsa05221      | Acute myeloid leukemia                                        | 3            | $4.53 \times 10^{-2}$  | $3.89 \times 10^0$     |
